# Supplementary material for: Physicochemical and biological ageing processes of (micro)plastics in the environment: a multi-tiered study on polyethylene
Source: Research Square preprint supplement (doi:10.21203/rs.3.rs-1589987/v1), 2022-05-13
Supplement: Supplementary file 1 [file bf452c0d9fb54ffbd95b10c9.pdf]

# **Physicochemical and biological ageing processes of (micro)plastics in the environment: a multi-tiered study on polyethylene**

Gilberto Binda<sup>1,2\*</sup>, Giorgio Zanetti<sup>2</sup>, Arianna Bellasi<sup>2</sup>, Davide Spanu<sup>2</sup>, Ginevra Boldrocchi<sup>3</sup>, Roberta Bettinetti<sup>3</sup>, Andrea Pozzi<sup>2</sup>, Luca Nizzetto<sup>1,4\*</sup>

<sup>1</sup> Norwegian Institute for Water Research (NIVA), Økernveien 94, 0579 Oslo, Norway

<sup>2</sup> Department of Science and High Technology, University of Insubria, Via Valleggio 11, 22100 Como, Italy

<sup>3</sup> Department of Human and Innovation for the Territory, University of Insubria, Via Valleggio 11, 22100 Como, Italy

<sup>4</sup> RECETOX, Masarik University, Kamenice 753/5, 625 00 Brno, Czech Republic

**Supplementary information, Tables S1-S2 and Figs. S1-S3**

**Table S1** Chemical features of lake water used in the experiments.

| <b>Variable</b>                    | <b>Unit</b>             | <b>Value</b> |
|------------------------------------|-------------------------|--------------|
| <b>Date</b>                        | -                       | 18/02/2021   |
| <b>pH</b>                          | -                       | 8.2          |
| <b>Electrical conductivity</b>     | $\mu\text{S}/\text{cm}$ | 210          |
| <b>Alkalinity</b>                  | mmol/l                  | 1.5          |
| <b>Chemical Oxygen Demand</b>      | mg/L                    | 18           |
| <b>Na<sup>+</sup></b>              | mg/L                    | 2.84         |
| <b>NH<sub>4</sub><sup>+</sup></b>  | mg/L                    | 0.95         |
| <b>K<sup>+</sup></b>               | mg/L                    | 1.59         |
| <b>Mg<sup>2+</sup></b>             | mg/L                    | 3.88         |
| <b>Ca<sup>2+</sup></b>             | mg/L                    | 16.75        |
| <b>F<sup>-</sup></b>               | mg/L                    | 1.3          |
| <b>Cl<sup>-</sup></b>              | mg/L                    | 3.73         |
| <b>NO<sub>3</sub><sup>-</sup></b>  | mg/L                    | 3.55         |
| <b>SO<sub>4</sub><sup>2-</sup></b> | mg/L                    | 15.7         |

**Table S2** Chemical composition of salt depositions in biofouled plastics after UV ageing in air, analyzed by means of SEM-EDX. Data are shown as average  $\pm$  standard deviation after 5 measurements.

| <b>Element</b> | <b>Concentration (wt%)</b> |
|----------------|----------------------------|
| C              | 47.81 $\pm$ 18.55          |
| O              | 30.1 $\pm$ 10.44           |
| Ca             | 21.41 $\pm$ 1.58           |
| Cl             | 7.2 $\pm$ 4.69             |
| K              | 4.36 $\pm$ 4.84            |
| Na             | 2.61 $\pm$ 1.01            |

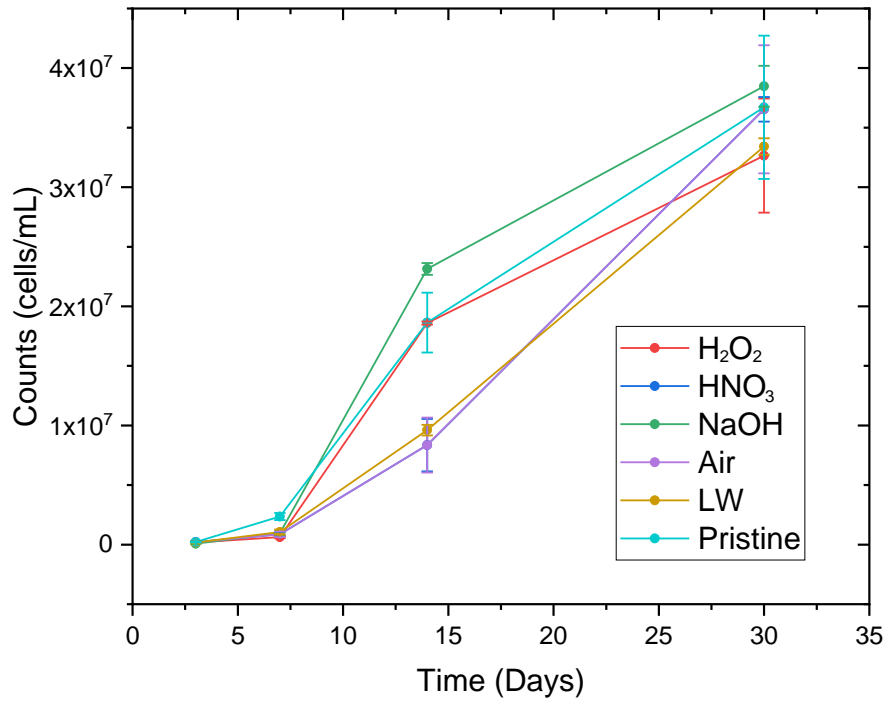

**Fig. S1** Algal growth in all the incubation batches for pristine PE fragments (in light blue), and previously UV aged in H<sub>2</sub>O<sub>2</sub> (in red), HNO<sub>3</sub> (in blue), NaOH (in green), air (in purple), and lake water (LW, in brown). Error bars indicate the standard deviation values after 3 measurements.

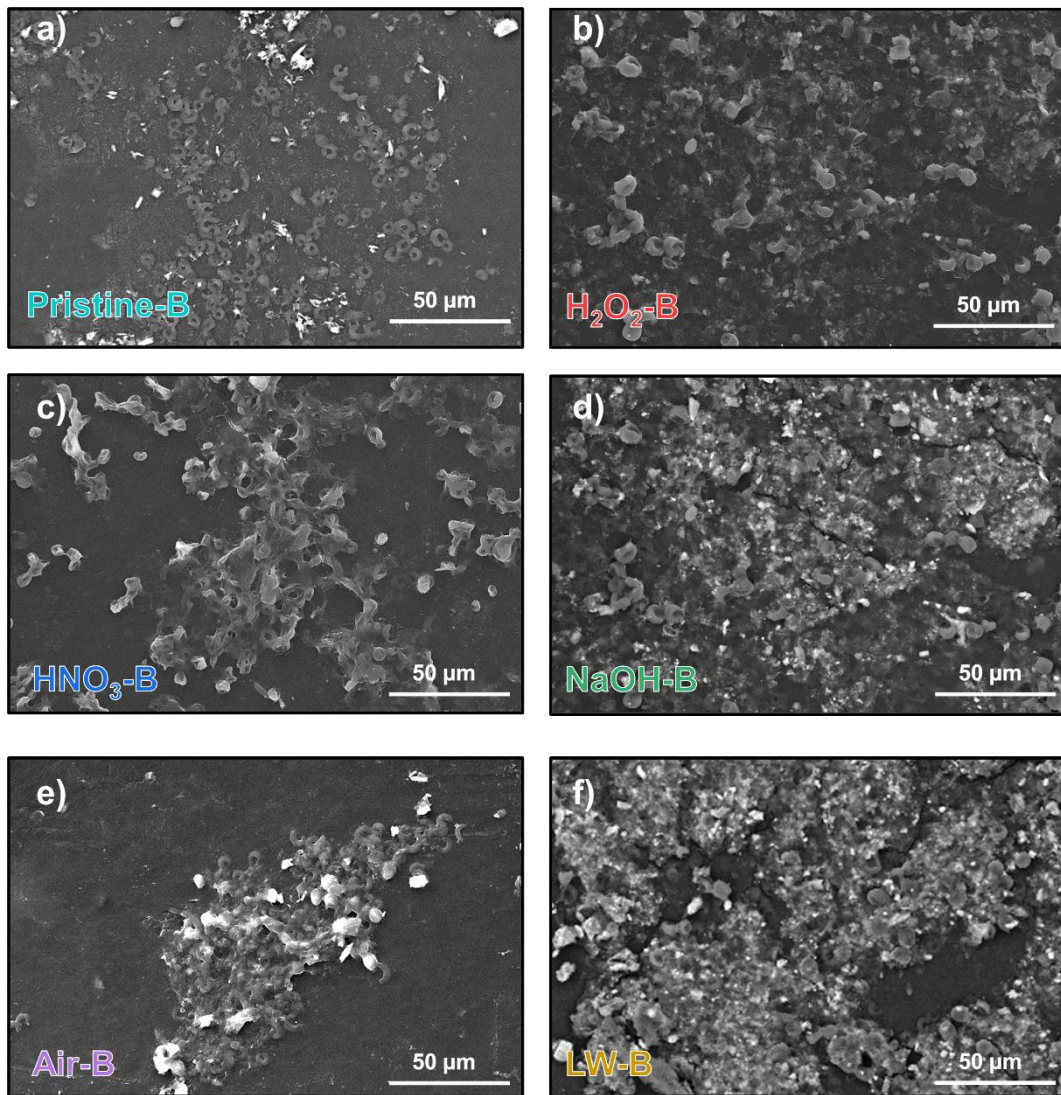

**Fig. S2:** SEM micrographs of the different PE MPs at 500x magnifications after 30 days of biofouling. a) pristine PE (Pristine-B), and previously UV aged in: b) H<sub>2</sub>O<sub>2</sub> (H<sub>2</sub>O<sub>2</sub>-B), c) HNO<sub>3</sub> (HNO<sub>3</sub>-B), d) NaOH (NaOH -B), e) air (Air-B), and f) lake water (LW-B).

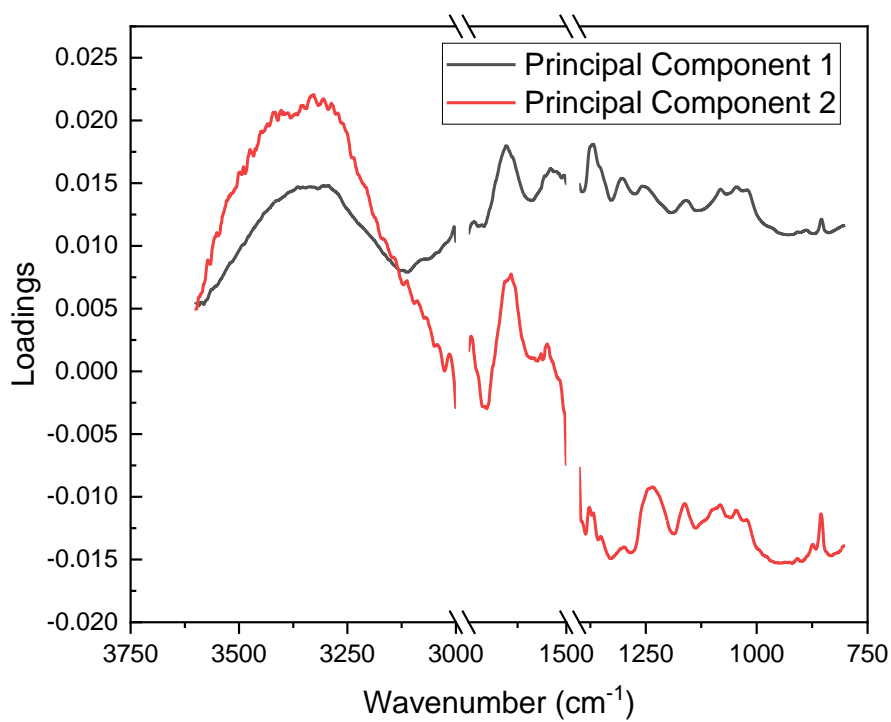

**Fig. S3** Loading values at different FT-IR bands for principal component 1 (in black) and 2 (in red), representing the 96.91% and 1.99% of the total variance, respectively.
