# Supplementary material for: Physicochemical and biological ageing processes of (micro)plastics in the environment: a multi-tiered study on polyethylene
Source: Research Square preprint supplement (doi:10.21203/rs.3.rs-1589987/v1), 2022-05-13
Supplement: Supplementary file 1 [file e740f9d672b026d98c1910a0.xlsx]

## Sheet: IR spectra
Raw IR spectra of pristine and aged PE
	Wavenumber	Pristine	H2O2	HNO3	NaOH	Air	LW	H2O2-B	HNO3-B	NaOH-B	air-B	LW-B	Pristine-B
	4000.05	0.00159	0.0067	0.00161	0.00175	0.0017	0.00386	0.00497138	0.00170988	0.00143185	0.00474058	0.00052053	0.00120647
	3999.81	0.00159	0.0067	0.00161	0.00175	0.0017	0.00386	0.00473258	0.00168338	0.00147055	0.00464798	0.00034154	0.00126866
	3999.57	0.00159	0.00669	0.00161	0.00175	0.0017	0.00386	0.0044142	0.001584	0.00143186	0.0044831	0.0001795	0.00136919
	3999.33	0.00159	0.00669	0.00161	0.00175	0.0017	0.00386	0.0040667	0.00143515	0.00132704	0.00427834	7.488e-05	0.00149176
	3999.09	0.0016	0.00668	0.00162	0.00175	0.00171	0.00386	0.00374626	0.00125881	0.00118342	0.0040679	5.208e-05	0.00160991
	3998.84	0.0016	0.00668	0.00162	0.00176	0.00171	0.00386	0.0035013	0.00107469	0.00103553	0.00388146	0.0001124	0.00169558
	3998.6	0.0016	0.00668	0.00162	0.00176	0.00171	0.00386	0.0033614	0.00090032	0.00091834	0.00373613	0.00023569	0.00172819
	3998.36	0.00161	0.00668	0.00163	0.00176	0.00171	0.00387	0.00333341	0.00075467	0.00085834	0.0036375	0.00038736	0.00170499
	3998.12	0.00161	0.00668	0.00163	0.00177	0.00172	0.00387	0.00339937	0.00065668	0.00086933	0.00358231	0.00053315	0.00164301
	3997.88	0.00162	0.00668	0.00164	0.00177	0.00172	0.00387	0.00352152	0.00062499	0.000951	0.00356315	0.0006496	0.00157352
	3997.64	0.00162	0.00668	0.00164	0.00178	0.00173	0.00388	0.00365256	0.00067195	0.00108893	0.00357153	0.00073014	0.00152918
	3997.4	0.00163	0.00668	0.00165	0.00179	0.00173	0.00388	0.00374807	0.00079837	0.00125699	0.00360138	0.00078395	0.00153027
	3997.16	0.00164	0.00669	0.00165	0.00179	0.00174	0.00389	0.00377747	0.00099034	0.00142431	0.00364545	0.00083057	0.00157634
	3996.92	0.00164	0.00669	0.00166	0.0018	0.00174	0.00389	0.00373187	0.00122043	0.00156134	0.00369856	0.00088997	0.00164746
	3996.67	0.00165	0.0067	0.00167	0.00181	0.00175	0.0039	0.00362579	0.00145348	0.00164829	0.00375356	0.00097592	0.00171115
	3996.43	0.00166	0.0067	0.00167	0.00182	0.00176	0.0039	0.00349189	0.00165437	0.00167835	0.00380533	0.00109041	0.00173804
	3996.19	0.00167	0.00671	0.00168	0.00183	0.00177	0.00391	0.00337336	0.00179694	0.00165885	0.00385026	0.00122568	0.00171382
	3995.95	0.00168	0.00671	0.00169	0.00184	0.00178	0.00391	0.00331016	0.00186724	0.00160749	0.00388944	0.00136558	0.00164522
	3995.71	0.00169	0.00672	0.0017	0.00185	0.00178	0.00392	0.00332991	0.00186495	0.00154571	0.00392696	0.00149356	0.00155653
	3995.47	0.0017	0.00673	0.00171	0.00186	0.00179	0.00393	0.00343942	0.00180132	0.00149075	0.00396913	0.00159123	0.00147864
	3995.23	0.00171	0.00673	0.00171	0.00187	0.0018	0.00393	0.00362317	0.0016938	0.00145142	0.0040186	0.00164631	0.00143666
	3994.99	0.00172	0.00674	0.00172	0.00188	0.00181	0.00394	0.00384527	0.00156262	0.00142629	0.00407247	0.00164812	0.00143888
	3994.75	0.00173	0.00675	0.00173	0.00189	0.00183	0.00395	0.00406265	0.00142723	0.00140833	0.00412005	0.00159228	0.00147509
	3994.51	0.00174	0.00676	0.00174	0.0019	0.00184	0.00396	0.0042342	0.00130311	0.00138993	0.00414568	0.00147645	0.00152192
	3994.26	0.00175	0.00677	0.00175	0.00192	0.00185	0.00397	0.00433559	0.00120139	0.00136941	0.00413382	0.00130487	0.00155382
	3994.02	0.00176	0.00678	0.00176	0.00193	0.00186	0.00397	0.00435986	0.00112477	0.00135229	0.00407461	0.00108694	0.0015549
	3993.78	0.00177	0.00679	0.00177	0.00194	0.00187	0.00398	0.00431675	0.00106956	0.00135065	0.0039689	0.00083931	0.00152269
	3993.54	0.00178	0.0068	0.00178	0.00196	0.00188	0.00399	0.00422633	0.00102396	0.00137602	0.00382855	0.00058503	0.00146831
	3993.3	0.0018	0.00681	0.00179	0.00197	0.0019	0.004	0.00410976	0.00097421	0.00143603	0.00367518	0.00035034	0.00140859
	3993.06	0.00181	0.00683	0.0018	0.00198	0.00191	0.00401	0.00398313	0.00090618	0.00152976	0.00353451	0.00016251	0.00135957
	3992.82	0.00182	0.00684	0.00181	0.002	0.00192	0.00402	0.00385644	0.00081335	0.00164824	0.00343165	4.234e-05	0.0013279
	3992.58	0.00183	0.00685	0.00182	0.00201	0.00194	0.00402	0.00373246	0.00070005	0.00177805	0.00338395	0	0.00131167
	3992.34	0.00184	0.00686	0.00183	0.00203	0.00195	0.00403	0.00361065	0.00057856	0.00190558	0.0033957	3.163e-05	0.00130182
	3992.09	0.00186	0.00688	0.00184	0.00204	0.00196	0.00404	0.00349084	0.00046687	0.00202135	0.00345889	0.00012175	0.00128896
	3991.85	0.00187	0.00689	0.00185	0.00205	0.00198	0.00405	0.00337598	0.00037843	0.00211975	0.00355231	0.00024737	0.00126774
	3991.61	0.00188	0.0069	0.00186	0.00207	0.00199	0.00406	0.00326966	0.00031814	0.00219686	0.00364823	0.00038488	0.00123945
	3991.37	0.00189	0.00691	0.00187	0.00208	0.002	0.00407	0.00317609	0.00027865	0.00224725	0.00371423	0.00051854	0.00121082
	3991.13	0.0019	0.00693	0.00189	0.0021	0.00202	0.00407	0.00309613	0.000246	0.0022602	0.00372297	0.00064336	0.00118926
	3990.89	0.00192	0.00694	0.0019	0.00211	0.00203	0.00408	0.00302453	0.0002088	0.00222212	0.00365391	0.00076679	0.00117856
	3990.65	0.00193	0.00695	0.00191	0.00212	0.00205	0.00409	0.00295432	0.00016763	0.00211953	0.00350359	0.00090438	0.00117476
	3990.41	0.00194	0.00697	0.00192	0.00214	0.00206	0.0041	0.00287948	0.00014011	0.00194431	0.00328495	0.00107188	0.00116622
	3990.17	0.00195	0.00698	0.00193	0.00215	0.00207	0.00411	0.00280104	0.00015719	0.00170065	0.00302779	0.00127788	0.00114054
	3989.92	0.00196	0.007	0.00194	0.00216	0.00209	0.00411	0.00273095	0.00025191	0.00140514	0.00277573	0.00151686	0.00108513
	3989.68	0.00197	0.00701	0.00195	0.00218	0.0021	0.00412	0.00268916	0.000442	0.00108383	0.00257326	0.00176785	0.00099829
	3989.44	0.00198	0.00702	0.00195	0.00219	0.00211	0.00413	0.0026992	0.00071918	0.0007677	0.00246045	0.00200067	0.00088847
	3989.2	0.00199	0.00704	0.00196	0.0022	0.00213	0.00413	0.00277869	0.00104647	0.00048575	0.00246306	0.00218265	0.00077463
	3988.96	0.002	0.00705	0.00197	0.00221	0.00214	0.00414	0.00293132	0.00136325	0.00026061	0.00258814	0.00228753	0.00068122
	3988.72	0.00201	0.00706	0.00198	0.00222	0.00215	0.00415	0.00314403	0.00160454	0.00010427	0.00282071	0.00230321	0.00063062
	3988.48	0.00202	0.00707	0.00199	0.00224	0.00217	0.00415	0.00338755	0.00171838	1.939e-05	0.0031272	0.00223322	0.00063779
	3988.24	0.00203	0.00709	0.002	0.00225	0.00218	0.00416	0.00362412	0.00168196	0	0.00346134	0.0020936	0.00070281
	3988	0.00204	0.0071	0.00201	0.00226	0.00219	0.00416	0.00381994	0.00150696	3.39e-05	0.00377162	0.0019087	0.0008114
	3987.76	0.00205	0.00711	0.00201	0.00227	0.0022	0.00417	0.00395101	0.00123638	0.00010481	0.00401281	0.00169954	0.00093694
	3987.51	0.00206	0.00712	0.00202	0.00228	0.00221	0.00417	0.00401026	0.00093096	0.00019469	0.00415222	0.00148354	0.00104897
	3987.27	0.00207	0.00713	0.00203	0.00229	0.00223	0.00418	0.00400819	0.00065385	0.00028697	0.0041793	0.00126978	0.00112035
	3987.03	0.00207	0.00715	0.00204	0.00229	0.00224	0.00418	0.00396561	0.00045672	0.00036863	0.00410545	0.0010637	0.00113593
	3986.79	0.00208	0.00716	0.00204	0.0023	0.00225	0.00419	0.0039061	0.00036906	0.00043314	0.00396429	0.00087105	0.00109719
	3986.55	0.00209	0.00717	0.00205	0.00231	0.00226	0.00419	0.00384876	0.00039836	0.00048078	0.00380184	0.00070099	0.00101972
	3986.31	0.00209	0.00718	0.00206	0.00232	0.00227	0.0042	0.00380466	0.00052945	0.00051833	0.00366789	0.00056643	0.00092832
	3986.07	0.0021	0.00719	0.00206	0.00232	0.00228	0.0042	0.00377423	0.00073222	0.0005546	0.00360284	0.00048307	0.00084795
	3985.83	0.0021	0.0072	0.00207	0.00233	0.00229	0.0042	0.00375344	0.0009665	0.00059569	0.00362695	0.00046199	0.00079505
	3985.59	0.00211	0.00721	0.00207	0.00234	0.0023	0.00421	0.00373789	0.00119033	0.00064158	0.00373748	0.00050456	0.00077287
	3985.34	0.00211	0.00722	0.00208	0.00234	0.0023	0.00421	0.00372518	0.00136675	0.00068529	0.00390879	0.00060248	0.00077479
	3985.1	0.00212	0.00723	0.00208	0.00235	0.00231	0.00421	0.00371909	0.00147186	0.00071568	0.00410128	0.00073778	0.00078539
	3984.86	0.00212	0.00723	0.00208	0.00235	0.00232	0.00421	0.00372709	0.0014982	0.00072169	0.00427542	0.0008894	0.00079238
	3984.62	0.00212	0.00724	0.00209	0.00235	0.00233	0.00421	0.00375838	0.00145786	0.00070114	0.00440235	0.00103937	0.00079171
	3984.38	0.00213	0.00725	0.00209	0.00235	0.00233	0.00422	0.00382007	0.00137701	0.00066366	0.00447256	0.0011771	0.0007901
	3984.14	0.00213	0.00726	0.00209	0.00236	0.00234	0.00422	0.0039176	0.00128709	0.00062799	0.00449733	0.00130008	0.00079976
	3983.9	0.00213	0.00726	0.0021	0.00236	0.00235	0.00422	0.00405044	0.0012144	0.00061769	0.00450085	0.00140987	0.00083539
	3983.66	0.00213	0.00727	0.0021	0.00236	0.00235	0.00422	0.00421326	0.00117069	0.0006522	0.00450789	0.00150698	0.00090094
	3983.42	0.00213	0.00728	0.0021	0.00236	0.00236	0.00422	0.00439741	0.00115158	0.00073922	0.00453643	0.0015875	0.00098937
	3983.17	0.00213	0.00728	0.0021	0.00236	0.00236	0.00422	0.00458869	0.00113912	0.00086948	0.00458684	0.00164225	0.00108046
	3982.93	0.00213	0.00729	0.0021	0.00236	0.00237	0.00422	0.00476873	0.00111434	0.00101938	0.0046451	0.00166083	0.00114824
	3982.69	0.00213	0.00729	0.0021	0.00236	0.00237	0.00422	0.00491714	0.00106692	0.00115785	0.00468751	0.00163827	0.00117
	3982.45	0.00213	0.0073	0.0021	0.00236	0.00237	0.00422	0.00501318	0.00100377	0.00125674	0.00469195	0.00157922	0.00113732
	3982.21	0.00212	0.0073	0.0021	0.00235	0.00238	0.00422	0.00503899	0.00094834	0.00130019	0.00464824	0.00150324	0.00105821
	3981.97	0.00212	0.0073	0.0021	0.00235	0.00238	0.00422	0.00498571	0.00093258	0.00128772	0.00456306	0.00143548	0.00095608
	3981.73	0.00212	0.00731	0.0021	0.00235	0.00238	0.00422	0.00485475	0.00098204	0.00123405	0.00445673	0.0014023	0.00086119
	3981.49	0.00212	0.00731	0.0021	0.00234	0.00238	0.00422	0.00465972	0.00110708	0.00116247	0.00435834	0.0014194	0.00080147
	3981.25	0.00211	0.00731	0.0021	0.00234	0.00238	0.00422	0.00442419	0.00129377	0.00109588	0.0042932	0.00148852	0.00078946
	3981.01	0.00211	0.00731	0.00209	0.00234	0.00239	0.00422	0.00417879	0.00151081	0.00104878	0.00427674	0.00159335	0.0008224
	3980.76	0.0021	0.00732	0.00209	0.00233	0.00239	0.00422	0.00395493	0.00171684	0.00102611	0.00430801	0.00170542	0.00088293
	3980.52	0.0021	0.00732	0.00209	0.00232	0.00239	0.00422	0.00378058	0.00187792	0.0010233	0.00437446	0.00179583	0.00094775
	3980.28	0.00209	0.00732	0.00209	0.00232	0.00239	0.00421	0.00367554	0.00197343	0.00103154	0.00445502	0.00184294	0.00099597
	3980.04	0.00209	0.00732	0.00208	0.00231	0.00238	0.00421	0.00365024	0.0020037	0.00104302	0.00452954	0.00183898	0.00101601
	3979.8	0.00208	0.00732	0.00208	0.0023	0.00238	0.00421	0.00370381	0.00198649	0.00105817	0.00458211	0.00179287	0.00101044
	3979.56	0.00208	0.00732	0.00207	0.0023	0.00238	0.00421	0.00382627	0.00194818	0.00108453	0.00460646	0.00172415	0.00099129
	3979.32	0.00207	0.00732	0.00207	0.00229	0.00238	0.00421	0.0040017	0.00191387	0.00113501	0.00460424	0.00165894	0.000973
	3979.08	0.00206	0.00732	0.00206	0.00228	0.00238	0.00421	0.00421025	0.0019008	0.00122277	0.00458354	0.001616	0.00096692
	3978.84	0.00206	0.00732	0.00206	0.00227	0.00237	0.00421	0.00443187	0.00191395	0.00135525	0.0045521	0.00160655	0.00097655
	3978.59	0.00205	0.00732	0.00205	0.00226	0.00237	0.00421	0.00464733	0.00194704	0.00152841	0.00451636	0.0016287	0.00099641
	3978.35	0.00204	0.00732	0.00205	0.00226	0.00237	0.0042	0.00484072	0.00198695	0.00172692	0.00447757	0.00167125	0.00101721
	3978.11	0.00203	0.00732	0.00204	0.00225	0.00236	0.0042	0.00500012	0.00201882	0.00192499	0.00443315	0.00171808	0.00102848
	3977.87	0.00203	0.00731	0.00203	0.00224	0.00236	0.0042	0.00511736	0.00202984	0.00209562	0.00437691	0.00175452	0.00102832
	3977.63	0.00202	0.00731	0.00203	0.00223	0.00235	0.0042	0.00518822	0.00201321	0.00221624	0.00430361	0.00177247	0.00102138
	3977.39	0.00201	0.00731	0.00202	0.00222	0.00235	0.0042	0.00521193	0.00196674	0.00227677	0.00421067	0.00177244	0.00101822
	3977.15	0.002	0.00731	0.00201	0.00221	0.00234	0.0042	0.00519074	0.00189725	0.0022823	0.00410132	0.0017643	0.00103163
	3976.91	0.00199	0.0073	0.002	0.0022	0.00234	0.0042	0.00512815	0.00181594	0.00225264	0.00398549	0.00176306	0.00107148
	3976.67	0.00198	0.0073	0.00199	0.00219	0.00233	0.0042	0.00502695	0.00173715	0.00221291	0.00387868	0.00178571	0.0011395
	3976.42	0.00198	0.0073	0.00199	0.00218	0.00233	0.0042	0.00488895	0.00167476	0.00218687	0.00379859	0.00184472	0.00122855
	3976.18	0.00197	0.00729	0.00198	0.00216	0.00232	0.0042	0.0047146	0.00163757	0.00218542	0.00376106	0.00194237	0.0013267
	3975.94	0.00196	0.00729	0.00197	0.00215	0.00231	0.0042	0.00450538	0.00162625	0.00220585	0.00377229	0.00206879	0.00142082
	3975.7	0.00195	0.00729	0.00196	0.00214	0.00231	0.0042	0.00426697	0.00163389	0.00222928	0.00382966	0.00220262	0.00150083
	3975.46	0.00194	0.00728	0.00195	0.00213	0.0023	0.0042	0.00401184	0.00164906	0.00223227	0.00391723	0.00231717	0.00156359
	3975.22	0.00193	0.00728	0.00194	0.00212	0.00229	0.0042	0.00376109	0.00166099	0.00219534	0.00401309	0.00238559	0.00161141
	3974.98	0.00192	0.00727	0.00193	0.00211	0.00228	0.0042	0.00354359	0.00166538	0.00211218	0.00409432	0.00239181	0.0016502
	3974.74	0.00191	0.00727	0.00192	0.0021	0.00228	0.0042	0.00338715	0.00166589	0.00199269	0.0041433	0.0023348	0.00168556
	3974.5	0.0019	0.00726	0.00191	0.00209	0.00227	0.0042	0.00331557	0.00167417	0.00186082	0.00415309	0.00223054	0.00171988
	3974.26	0.00189	0.00726	0.0019	0.00208	0.00226	0.0042	0.00333694	0.00170205	0.00174498	0.00412564	0.00210765	0.00175316
	3974.01	0.00188	0.00725	0.00189	0.00206	0.00225	0.0042	0.00344029	0.00175756	0.00167011	0.00407004	0.0019996	0.00178421
	3973.77	0.00187	0.00725	0.00188	0.00205	0.00224	0.0042	0.00359521	0.00183703	0.00164887	0.00399889	0.00193733	0.0018144
	3973.53	0.00187	0.00724	0.00187	0.00204	0.00224	0.0042	0.00375836	0.00192493	0.00167967	0.00392314	0.0019386	0.00184623
	3973.29	0.00186	0.00724	0.00186	0.00203	0.00223	0.0042	0.00388646	0.00199662	0.00174734	0.00385029	0.00200541	0.00188465
	3973.05	0.00185	0.00723	0.00185	0.00202	0.00222	0.0042	0.00394988	0.00202506	0.001831	0.0037852	0.00212251	0.00193252
	3972.81	0.00184	0.00723	0.00183	0.00201	0.00221	0.0042	0.00394002	0.0019861	0.00190963	0.00373083	0.00226252	0.00198836
	3972.57	0.00183	0.00722	0.00182	0.002	0.0022	0.0042	0.00387458	0.00186769	0.00196648	0.00369038	0.0023933	0.00204206
	3972.33	0.00182	0.00721	0.00181	0.00199	0.00219	0.00421	0.00378952	0.00166957	0.00199276	0.00366901	0.0024824	0.0020785
	3972.09	0.00181	0.00721	0.0018	0.00198	0.00218	0.00421	0.0037259	0.00140481	0.00198569	0.00366968	0.00250483	0.00208008
	3971.84	0.0018	0.0072	0.00179	0.00197	0.00217	0.00421	0.00371513	0.00109734	0.00195002	0.00369223	0.00244637	0.00203609
	3971.6	0.00179	0.00719	0.00178	0.00196	0.00216	0.00421	0.00376738	0.00077787	0.00189318	0.00373071	0.00230548	0.00194379
	3971.36	0.00179	0.00719	0.00176	0.00195	0.00215	0.00421	0.00386991	0.00047971	0.00182832	0.00377513	0.00209242	0.00181418
	3971.12	0.00178	0.00718	0.00175	0.00194	0.00215	0.00422	0.00399529	0.00023446	0.00177061	0.0038129	0.00182978	0.00166616
	3970.88	0.00177	0.00717	0.00174	0.00193	0.00214	0.00422	0.00411451	6.921e-05	0.00173511	0.00383591	0.00154937	0.00152041
	3970.64	0.00176	0.00717	0.00173	0.00192	0.00213	0.00422	0.00420752	0	0.0017331	0.00384274	0.00128727	0.00139244
	3970.4	0.00175	0.00716	0.00172	0.00191	0.00212	0.00423	0.00427174	3.107e-05	0.0017668	0.0038391	0.0010812	0.00128937
	3970.16	0.00175	0.00715	0.0017	0.0019	0.00211	0.00423	0.00431849	0.00015143	0.00182722	0.0038353	0.00096159	0.00120827
	3969.92	0.00174	0.00714	0.00169	0.00189	0.0021	0.00423	0.00436635	0.00033643	0.00189574	0.00384064	0.00094683	0.00114356
	3969.67	0.00173	0.00714	0.00168	0.00188	0.00209	0.00423	0.00443055	0.00055256	0.00194856	0.00385849	0.00103412	0.00108863
	3969.43	0.00172	0.00713	0.00167	0.00188	0.00208	0.00424	0.00451292	0.00076539	0.00196672	0.00388179	0.00120101	0.00104348
	3969.19	0.00172	0.00712	0.00166	0.00187	0.00207	0.00424	0.00460016	0.00094759	0.00194428	0.00389542	0.00140462	0.00101436
	3968.95	0.00171	0.00711	0.00165	0.00186	0.00206	0.00424	0.00466573	0.0010855	0.00189327	0.00388138	0.00159711	0.00101053
	3968.71	0.0017	0.00711	0.00163	0.00185	0.00205	0.00425	0.0046835	0.00117805	0.00183806	0.00382722	0.00173608	0.00103695
	3968.47	0.0017	0.0071	0.00162	0.00185	0.00205	0.00425	0.00463414	0.00123211	0.00180461	0.00373145	0.00179933	0.00108794
	3968.23	0.00169	0.00709	0.00161	0.00184	0.00204	0.00425	0.00451534	0.00125375	0.00180709	0.00360454	0.00178695	0.00114425
	3967.99	0.00168	0.00708	0.0016	0.00183	0.00203	0.00426	0.00434067	0.00124482	0.00183732	0.00346761	0.00172272	0.00117828
	3967.75	0.00168	0.00708	0.00159	0.00183	0.00202	0.00426	0.00413327	0.00120082	0.00186553	0.00334132	0.00164293	0.00115996
	3967.51	0.00167	0.00707	0.00158	0.00182	0.00201	0.00427	0.00391942	0.00111778	0.00184873	0.00324291	0.00158333	0.00106943
	3967.26	0.00167	0.00706	0.00157	0.00182	0.00201	0.00427	0.00372267	0.00099767	0.00174796	0.00318033	0.00156697	0.00090415
	3967.02	0.00166	0.00705	0.00156	0.00181	0.002	0.00427	0.00355967	0.00085513	0.00154601	0.00315255	0.00159941	0.00068342
	3966.78	0.00166	0.00704	0.00155	0.00181	0.00199	0.00428	0.0034411	0.00071521	0.0012557	0.00315529	0.00166533	0.00044316
	3966.54	0.00165	0.00704	0.00154	0.0018	0.00198	0.00428	0.00337385	0.00060998	0.00092221	0.00318258	0.00173656	0.00022908
	3966.3	0.00165	0.00703	0.00153	0.0018	0.00198	0.00428	0.00335978	0.00056581	0.00060999	0.00323211	0.00178203	8.369e-05
	3966.06	0.00164	0.00702	0.00152	0.00179	0.00197	0.00429	0.00339675	0.00059393	0.00038458	0.00330417	0.00177897	3.757e-05
	3965.82	0.00164	0.00701	0.00151	0.00179	0.00196	0.00429	0.00347484	0.00068753	0.00029112	0.0033976	0.00172173	9.72e-05
	3965.58	0.00164	0.007	0.0015	0.00179	0.00195	0.0043	0.00357499	0.00082167	0.00034175	0.00350655	0.00162286	0.00024957
	3965.34	0.00163	0.007	0.00149	0.00178	0.00195	0.0043	0.00367162	0.00096219	0.00051384	0.00361776	0.0015093	0.00046218
	3965.09	0.00163	0.00699	0.00148	0.00178	0.00194	0.0043	0.00373739	0.00107888	0.00075803	0.00371134	0.00141299	0.00069302
	3964.85	0.00163	0.00698	0.00147	0.00178	0.00194	0.00431	0.00375219	0.00115115	0.00101566	0.00376676	0.00136155	0.00089975
	3964.61	0.00162	0.00697	0.00146	0.00178	0.00193	0.00431	0.00371093	0.00117455	0.00123295	0.00377031	0.00136755	0.00104743
	3964.37	0.00162	0.00696	0.00145	0.00178	0.00193	0.00431	0.00362796	0.00115821	0.00137574	0.00371927	0.00142849	0.00111669
	3964.13	0.00162	0.00695	0.00145	0.00177	0.00192	0.00432	0.00353295	0.0011212	0.00143277	0.00362666	0.00152557	0.00110602
	3963.89	0.00162	0.00695	0.00144	0.00177	0.00192	0.00432	0.00346386	0.00108436	0.00141558	0.00351668	0.00163368	0.00103201
	3963.65	0.00162	0.00694	0.00143	0.00177	0.00191	0.00432	0.00345167	0.0010703	0.00135032	0.00341741	0.00172832	0.00092576
	3963.41	0.00161	0.00693	0.00142	0.00177	0.00191	0.00433	0.00351144	0.00109999	0.00127002	0.00335215	0.00179324	0.00082526
	3963.17	0.00161	0.00692	0.00142	0.00177	0.0019	0.00433	0.00363672	0.00119145	0.00120643	0.00333304	0.0018226	0.00076858
	3962.93	0.00161	0.00691	0.00141	0.00177	0.0019	0.00433	0.00380285	0.00135839	0.00118447	0.00336008	0.0018211	0.00078342
	3962.68	0.00161	0.00691	0.00141	0.00177	0.00189	0.00434	0.00397267	0.00160706	0.00121851	0.00342062	0.00179719	0.00088286
	3962.44	0.00161	0.0069	0.0014	0.00177	0.00189	0.00434	0.00410873	0.00192619	0.00130898	0.0034962	0.00176008	0.00105894
	3962.2	0.00161	0.00689	0.00139	0.00177	0.00189	0.00434	0.00418436	0.00228553	0.00144031	0.00356617	0.00171393	0.00128482
	3961.96	0.00161	0.00688	0.00139	0.00177	0.00189	0.00434	0.0041923	0.00263573	0.00158326	0.00361455	0.00165936	0.00151714
	3961.72	0.00161	0.00688	0.00139	0.00178	0.00188	0.00435	0.00414717	0.00291963	0.00169977	0.00363501	0.00159439	0.00170951
	3961.48	0.00161	0.00687	0.00138	0.00178	0.00188	0.00435	0.00407864	0.0030904	0.00175594	0.0036307	0.00151674	0.00182528
	3961.24	0.00161	0.00686	0.00138	0.00178	0.00188	0.00435	0.00401978	0.0031259	0.00173163	0.00361376	0.0014306	0.00184734
	3961	0.00161	0.00685	0.00137	0.00178	0.00188	0.00435	0.00399365	0.00303652	0.00162962	0.00360025	0.00134351	0.00178134
	3960.76	0.00161	0.00685	0.00137	0.00178	0.00188	0.00435	0.00401031	0.00285649	0.0014736	0.00360716	0.00126505	0.00165349
	3960.51	0.00161	0.00684	0.00137	0.00179	0.00188	0.00436	0.00406156	0.00263466	0.00130319	0.0036457	0.00120482	0.00150104
	3960.27	0.00161	0.00683	0.00137	0.00179	0.00187	0.00436	0.00412905	0.00241653	0.00116051	0.00372164	0.0011677	0.00136283
	3960.03	0.00162	0.00683	0.00136	0.00179	0.00187	0.00436	0.00418525	0.00223256	0.00107919	0.00383014	0.00115367	0.00127107
	3959.79	0.00162	0.00682	0.00136	0.0018	0.00187	0.00436	0.00420105	0.00209457	0.00107431	0.00395446	0.00115673	0.00124407
	3959.55	0.00162	0.00681	0.00136	0.0018	0.00187	0.00436	0.00415125	0.0019965	0.00113674	0.00406755	0.00116874	0.00128128
	3959.31	0.00162	0.00681	0.00136	0.0018	0.00187	0.00436	0.00402188	0.00192176	0.00123738	0.00413871	0.00117944	0.00136482
	3959.07	0.00163	0.0068	0.00136	0.00181	0.00188	0.00436	0.00381322	0.00185318	0.00133705	0.00414115	0.00118129	0.00146094
	3958.83	0.00163	0.00679	0.00136	0.00181	0.00188	0.00436	0.00354225	0.00177985	0.00139879	0.00406263	0.00116787	0.00153071
	3958.59	0.00163	0.00679	0.00136	0.00182	0.00188	0.00436	0.00324237	0.0016992	0.00140093	0.00391231	0.0011364	0.00153798
	3958.34	0.00164	0.00678	0.00136	0.00182	0.00188	0.00436	0.00295514	0.00161492	0.00134436	0.00372036	0.00108664	0.00146291
	3958.1	0.00164	0.00678	0.00136	0.00183	0.00188	0.00436	0.00272165	0.00153164	0.00125109	0.00353213	0.0010217	0.00130435
	3957.86	0.00164	0.00677	0.00136	0.00183	0.00188	0.00436	0.00257296	0.00145006	0.00115612	0.00339408	0.00095019	0.00108397
	3957.62	0.00165	0.00676	0.00136	0.00184	0.00189	0.00436	0.00252107	0.00136762	0.00109878	0.00333842	0.00088493	0.00084077
	3957.38	0.00165	0.00676	0.00137	0.00184	0.00189	0.00436	0.00255424	0.00127874	0.0011078	0.00337048	0.00084371	0.00062045
	3957.14	0.00166	0.00675	0.00137	0.00185	0.00189	0.00436	0.00263999	0.00118021	0.00119501	0.00346386	0.00084324	0.00046278
	3956.9	0.00166	0.00675	0.00137	0.00185	0.0019	0.00436	0.00273726	0.00107436	0.00135001	0.00357102	0.00089166	0.00039121
	3956.66	0.00167	0.00674	0.00137	0.00186	0.0019	0.00436	0.00280723	0.00096693	0.00154568	0.0036356	0.00098509	0.00040776
	3956.42	0.00167	0.00674	0.00138	0.00186	0.0019	0.00436	0.00282897	0.00086733	0.00174309	0.00361791	0.00110096	0.00049346
	3956.18	0.00168	0.00674	0.00138	0.00187	0.00191	0.00436	0.00280434	0.0007821	0.00190371	0.00350667	0.00120625	0.00061825
	3955.93	0.00168	0.00673	0.00138	0.00187	0.00191	0.00436	0.00275814	0.00071243	0.00199764	0.00332708	0.00126472	0.00075005
	3955.69	0.00169	0.00673	0.00139	0.00188	0.00191	0.00435	0.00273028	0.00065542	0.00200969	0.00313206	0.00125122	0.00086656
	3955.45	0.0017	0.00672	0.00139	0.00189	0.00192	0.00435	0.00276129	0.00060421	0.00194098	0.00298485	0.00116213	0.00095924
	3955.21	0.0017	0.00672	0.0014	0.00189	0.00192	0.00435	0.00287965	0.0005556	0.00180665	0.00294055	0.00102122	0.00103186
	3954.97	0.00171	0.00672	0.0014	0.0019	0.00193	0.00435	0.00309456	0.00051021	0.00162879	0.00302796	0.00087255	0.00109508
	3954.73	0.00172	0.00671	0.00141	0.00191	0.00193	0.00435	0.00339122	0.00047602	0.00143253	0.0032439	0.00077079	0.00115931
	3954.49	0.00172	0.00671	0.00141	0.00191	0.00194	0.00434	0.00373601	0.00046454	0.00123947	0.00355625	0.00076045	0.00122901
	3954.25	0.00173	0.00671	0.00142	0.00192	0.00195	0.00434	0.00408334	0.00048823	0.00106468	0.0039144	0.00086482	0.00130033
	3954.01	0.00174	0.00671	0.00142	0.00193	0.00195	0.00434	0.00438817	0.00055451	0.00091631	0.00426539	0.00107376	0.00136208
	3953.76	0.00174	0.0067	0.00143	0.00193	0.00196	0.00434	0.00461609	0.00066216	0.00079866	0.00456811	0.00135031	0.00140248
	3953.52	0.00175	0.0067	0.00144	0.00194	0.00196	0.00433	0.00475272	0.00080128	0.00071395	0.00480135	0.00164111	0.00141393
	3953.28	0.00176	0.0067	0.00144	0.00195	0.00197	0.00433	0.00480549	0.00095369	0.00066478	0.00496617	0.00189362	0.00139532
	3953.04	0.00177	0.0067	0.00145	0.00196	0.00198	0.00433	0.00480111	0.00109796	0.00065412	0.00507788	0.00207281	0.00135428
	3952.8	0.00178	0.00669	0.00146	0.00196	0.00198	0.00432	0.00477778	0.00121471	0.00068548	0.00515774	0.00216868	0.00130487
	3952.56	0.00179	0.00669	0.00147	0.00197	0.00199	0.00432	0.00477331	0.00129352	0.00075818	0.00522257	0.00219449	0.00126409
	3952.32	0.00179	0.00669	0.00147	0.00198	0.002	0.00432	0.00481114	0.00133601	0.00086646	0.00527936	0.00217426	0.00124457
	3952.08	0.0018	0.00669	0.00148	0.00198	0.00201	0.00432	0.00489494	0.00135773	0.0009999	0.00532495	0.00212924	0.00125406
	3951.84	0.00181	0.00669	0.00149	0.00199	0.00201	0.00431	0.00500877	0.00138306	0.00114684	0.00534958	0.00206646	0.00129377
	3951.59	0.00182	0.00669	0.0015	0.002	0.00202	0.00431	0.0051231	0.00144141	0.00129767	0.00534236	0.00197613	0.00136196
	3951.35	0.00183	0.00669	0.0015	0.00201	0.00203	0.0043	0.00520442	0.00155611	0.0014485	0.00529482	0.00184033	0.00145294
	3951.11	0.00184	0.00669	0.00151	0.00202	0.00204	0.0043	0.00522372	0.00173918	0.00160143	0.00520369	0.00164219	0.00156226
	3950.87	0.00185	0.00669	0.00152	0.00202	0.00204	0.0043	0.005166	0.00198289	0.00176265	0.00507078	0.00138158	0.00168583
	3950.63	0.00186	0.00669	0.00153	0.00203	0.00205	0.00429	0.00503376	0.00225675	0.00193874	0.00490632	0.00108289	0.00182134
	3950.39	0.00187	0.00669	0.00154	0.00204	0.00206	0.00429	0.00485073	0.00251116	0.00212962	0.0047244	0.00079962	0.00196463
	3950.15	0.00188	0.00669	0.00155	0.00205	0.00207	0.00429	0.00465668	0.00269146	0.00232447	0.00454642	0.00059762	0.00211064
	3949.91	0.00189	0.00669	0.00155	0.00206	0.00208	0.00428	0.00449021	0.00275638	0.00250455	0.0043888	0.00053756	0.00225204
	3949.67	0.0019	0.00669	0.00156	0.00206	0.00209	0.00428	0.00437431	0.00269882	0.00264489	0.00426277	0.0006457	0.00237748
	3949.43	0.00191	0.00669	0.00157	0.00207	0.00209	0.00428	0.00430469	0.00254614	0.00272703	0.00416803	0.00090672	0.00247424
	3949.18	0.00192	0.00669	0.00158	0.00208	0.0021	0.00427	0.0042546	0.00235203	0.00274246	0.00409391	0.0012654	0.00252975
	3948.94	0.00193	0.0067	0.00159	0.00209	0.00211	0.00427	0.00418739	0.0021744	0.00269596	0.00402446	0.0016503	0.00253371
	3948.7	0.00194	0.0067	0.0016	0.0021	0.00212	0.00426	0.00407233	0.00205929	0.00260122	0.00394577	0.00198773	0.00248219
	3948.46	0.00195	0.0067	0.00161	0.0021	0.00213	0.00426	0.00389319	0.00202662	0.00247739	0.00384769	0.0022192	0.00237887
	3948.22	0.00196	0.0067	0.00162	0.00211	0.00214	0.00426	0.0036546	0.00206841	0.00234171	0.00372694	0.00231046	0.00223898
	3947.98	0.00197	0.0067	0.00163	0.00212	0.00215	0.00425	0.00338486	0.00214996	0.00220517	0.00358882	0.00225725	0.00208496
	3947.74	0.00198	0.00671	0.00164	0.00213	0.00216	0.00425	0.0031279	0.00221975	0.00207121	0.00344554	0.00208611	0.00194624
	3947.5	0.00199	0.00671	0.00165	0.00214	0.00216	0.00425	0.00293055	0.00222709	0.00193556	0.00331177	0.00184829	0.00184482
	3947.26	0.002	0.00671	0.00165	0.00215	0.00217	0.00424	0.00282765	0.00213736	0.001791	0.00320046	0.00160301	0.00178896
	3947.01	0.00201	0.00672	0.00166	0.00216	0.00218	0.00424	0.0028279	0.00194386	0.00163403	0.00311611	0.00140047	0.00176883
	3946.77	0.00202	0.00672	0.00167	0.00216	0.00219	0.00424	0.00291549	0.00166829	0.00146956	0.003058	0.00126537	0.00176115
	3946.53	0.00203	0.00672	0.00168	0.00217	0.0022	0.00423	0.00305918	0.00134933	0.00130954	0.00302146	0.00119517	0.00173864
	3946.29	0.00204	0.00673	0.00169	0.00218	0.00221	0.00423	0.00322313	0.0010322	0.00117186	0.00300271	0.00116546	0.00168281
	3946.05	0.00205	0.00673	0.0017	0.00219	0.00222	0.00423	0.00337499	0.0007569	0.00107295	0.00300048	0.00114284	0.00158956
	3945.81	0.00206	0.00674	0.00171	0.0022	0.00223	0.00422	0.00348832	0.0005556	0.00102303	0.00301446	0.00109697	0.0014724
	3945.57	0.00207	0.00674	0.00172	0.00221	0.00224	0.00422	0.00354238	0.00044889	0.00102414	0.00304387	0.00100831	0.00135722
	3945.33	0.00208	0.00675	0.00173	0.00222	0.00225	0.00422	0.00352345	0.00044627	0.00106743	0.00308422	0.00087393	0.00127597
	3945.09	0.00209	0.00675	0.00174	0.00223	0.00226	0.00422	0.00342452	0.00054557	0.00113984	0.00312504	0.00070926	0.00125709
	3944.84	0.0021	0.00676	0.00175	0.00223	0.00227	0.00421	0.00325138	0.00073618	0.00122567	0.0031539	0.00054212	0.00131657
	3944.6	0.00211	0.00676	0.00176	0.00224	0.00228	0.00421	0.00302178	0.00100112	0.00131722	0.00315988	0.00040467	0.00145569
	3944.36	0.00211	0.00677	0.00177	0.00225	0.00229	0.00421	0.00276387	0.00132369	0.00141585	0.00313949	0.00032477	0.00166117
	3944.12	0.00212	0.00677	0.00177	0.00226	0.0023	0.00421	0.00251513	0.00169029	0.00153281	0.00310158	0.00031907	0.00191209
	3943.88	0.00213	0.00678	0.00178	0.00227	0.00231	0.0042	0.00231421	0.00208897	0.0016836	0.00306546	0.00039137	0.00218407
	3943.64	0.00214	0.00679	0.00179	0.00228	0.00232	0.0042	0.00219724	0.00250358	0.00187747	0.00305873	0.00053164	0.00245114
	3943.4	0.00215	0.00679	0.0018	0.00229	0.00232	0.0042	0.00219176	0.00290399	0.00211102	0.00310759	0.00071994	0.00268891
	3943.16	0.00216	0.0068	0.00181	0.0023	0.00233	0.0042	0.00230744	0.00324051	0.00235719	0.0032284	0.00092422	0.00286771
	3942.92	0.00217	0.00681	0.00182	0.00231	0.00234	0.0042	0.00252875	0.00344752	0.00256968	0.00341566	0.00110805	0.00295937
	3942.68	0.00218	0.00682	0.00183	0.00232	0.00235	0.00419	0.00281038	0.00346451	0.00269539	0.00364077	0.00123433	0.00294131
	3942.43	0.00219	0.00682	0.00184	0.00233	0.00236	0.00419	0.0030917	0.00326634	0.00269544	0.00386359	0.00127852	0.00280791
	3942.19	0.00219	0.00683	0.00185	0.00234	0.00237	0.00419	0.00332106	0.00288508	0.00256604	0.00405128	0.00123501	0.002574
	3941.95	0.0022	0.00684	0.00186	0.00235	0.00238	0.00419	0.00347295	0.00240127	0.00233867	0.00419553	0.0011198	0.00227081
	3941.71	0.00221	0.00685	0.00186	0.00235	0.00239	0.00419	0.00355065	0.00191461	0.00206481	0.00430766	0.00096326	0.00193377
	3941.47	0.00222	0.00686	0.00187	0.00236	0.0024	0.00419	0.00357092	0.00151343	0.00179485	0.00440536	0.00080158	0.0015921
	3941.23	0.00223	0.00687	0.00188	0.00237	0.00241	0.00419	0.00355346	0.00125381	0.00156737	0.0044984	0.00067136	0.001267
	3940.99	0.00223	0.00688	0.00189	0.00238	0.00242	0.00419	0.00350976	0.00115081	0.00140228	0.00458096	0.00060307	0.00097028
	3940.75	0.00224	0.00689	0.0019	0.00239	0.00243	0.00419	0.00344432	0.00118067	0.00130185	0.00463101	0.00061799	0.00070836
	3940.51	0.00225	0.0069	0.00191	0.0024	0.00244	0.00419	0.00335697	0.00128983	0.00125301	0.00462014	0.00072225	0.00048557
	3940.26	0.00226	0.00691	0.00192	0.00241	0.00245	0.00419	0.00324961	0.00141223	0.00123402	0.00452433	0.00090308	0.00030449
	3940.02	0.00226	0.00692	0.00193	0.00242	0.00246	0.00419	0.00313081	0.00148903	0.00122107	0.00434059	0.00112924	0.00016758
	3939.78	0.00227	0.00693	0.00194	0.00243	0.00247	0.00419	0.00301942	0.00148973	0.00119412	0.00409293	0.00135784	7.395e-05
	3939.54	0.00228	0.00695	0.00194	0.00244	0.00248	0.00419	0.00294142	0.0014186	0.00114278	0.00382994	0.00154448	2.079e-05
	3939.3	0.00228	0.00696	0.00195	0.00245	0.00249	0.00419	0.00292258	0.00130847	0.00106846	0.00361083	0.00165815	0
	3939.06	0.00229	0.00697	0.00196	0.00246	0.0025	0.00419	0.00298147	0.00120592	0.00098263	0.00348662	0.00168692	3.17e-06
	3938.82	0.00229	0.00698	0.00197	0.00247	0.00251	0.00419	0.00311972	0.00114831	0.00090329	0.00348359	0.00164367	1.908e-05
	3938.58	0.0023	0.007	0.00198	0.00248	0.00252	0.0042	0.00331933	0.0011528	0.00085191	0.00359366	0.00155803	4.153e-05
	3938.34	0.00231	0.00701	0.00199	0.00249	0.00253	0.0042	0.00354425	0.00120783	0.00084569	0.00377602	0.00146879	6.822e-05
	3938.09	0.00231	0.00703	0.002	0.0025	0.00254	0.0042	0.00375136	0.00128572	0.00089641	0.00397133	0.00140796	0.00010545
	3937.85	0.00232	0.00704	0.00201	0.00251	0.00255	0.0042	0.00390414	0.0013539	0.00100393	0.00412434	0.00139133	0.00016195
	3937.61	0.00232	0.00706	0.00202	0.00252	0.00256	0.0042	0.00398312	0.00139142	0.00115793	0.00420186	0.00141191	0.00024751
	3937.37	0.00233	0.00707	0.00203	0.00252	0.00257	0.0042	0.00399146	0.0013959	0.00134064	0.00420034	0.00144439	0.00036923
	3937.13	0.00233	0.00709	0.00203	0.00253	0.00258	0.00421	0.00395303	0.00138121	0.00153021	0.0041462	0.00145659	0.00052859
	3936.89	0.00234	0.0071	0.00204	0.00254	0.00259	0.00421	0.00390127	0.00136836	0.00170743	0.00408022	0.00141959	0.00072015
	3936.65	0.00234	0.00712	0.00205	0.00255	0.00259	0.00421	0.00387057	0.00137605	0.00185856	0.00404516	0.00131963	0.00093458
	3936.41	0.00235	0.00714	0.00206	0.00256	0.0026	0.00421	0.00388468	0.00141092	0.0019797	0.00406998	0.00116369	0.00116032
	3936.17	0.00235	0.00715	0.00207	0.00257	0.00261	0.00421	0.00395142	0.00146856	0.00207525	0.00416282	0.00097563	0.00138684
	3935.93	0.00235	0.00717	0.00208	0.00258	0.00262	0.00422	0.00406068	0.00153567	0.00215324	0.00430949	0.00078953	0.00160378
	3935.68	0.00236	0.00719	0.00209	0.00259	0.00263	0.00422	0.00418801	0.00159562	0.00222066	0.00447848	0.00063718	0.00180075
	3935.44	0.00236	0.00721	0.0021	0.0026	0.00264	0.00422	0.00430397	0.00163626	0.00227713	0.00462904	0.00053908	0.00196474
	3935.2	0.00237	0.00723	0.00211	0.0026	0.00265	0.00423	0.00437952	0.00165114	0.00231493	0.00472295	0.000499	0.00208316
	3934.96	0.00237	0.00725	0.00211	0.00261	0.00266	0.00423	0.00439581	0.00164085	0.00232185	0.00473294	0.00050383	0.00214308
	3934.72	0.00237	0.00727	0.00212	0.00262	0.00267	0.00423	0.00434811	0.00161148	0.00228853	0.00465228	0.00052943	0.00214196
	3934.48	0.00238	0.00729	0.00213	0.00263	0.00268	0.00423	0.00424687	0.00157441	0.00221697	0.0044968	0.00054908	0.00209247
	3934.24	0.00238	0.00731	0.00214	0.00264	0.00269	0.00424	0.00411612	0.00154585	0.00212543	0.00430452	0.00054245	0.00202446
	3934	0.00238	0.00733	0.00215	0.00264	0.00269	0.00424	0.003987	0.00154503	0.00204759	0.00412638	0.00050161	0.00198288
	3933.76	0.00239	0.00735	0.00216	0.00265	0.0027	0.00424	0.00388991	0.00159406	0.00202166	0.00401525	0.00043132	0.00201525
	3933.51	0.00239	0.00737	0.00217	0.00266	0.00271	0.00425	0.00384932	0.0017133	0.00208324	0.00401405	0.00034665	0.00216269
	3933.27	0.00239	0.00739	0.00218	0.00266	0.00272	0.00425	0.00387826	0.00191423	0.00225003	0.00414644	0.00026674	0.00244342
	3933.03	0.00239	0.00741	0.00218	0.00267	0.00273	0.00425	0.00397853	0.00219174	0.00251299	0.00440914	0.00021329	0.00284305
	3932.79	0.0024	0.00743	0.00219	0.00268	0.00274	0.00426	0.00413393	0.0025162	0.00282917	0.00476363	0.00020332	0.00330843
	3932.55	0.0024	0.00746	0.0022	0.00269	0.00275	0.00426	0.00431486	0.00283254	0.00312846	0.00513787	0.00024528	0.00375215
	3932.31	0.0024	0.00748	0.00221	0.00269	0.00275	0.00426	0.00448188	0.00307343	0.00333304	0.00544286	0.00033829	0.00407914
	3932.07	0.00241	0.0075	0.00222	0.0027	0.00276	0.00427	0.00460174	0.00318484	0.00338634	0.0056053	0.00047066	0.00421952
	3931.83	0.00241	0.00752	0.00223	0.0027	0.00277	0.00427	0.00466001	0.00314934	0.00327853	0.00559819	0.00062558	0.00416201
	3931.59	0.00241	0.00755	0.00224	0.00271	0.00278	0.00427	0.00466516	0.00299119	0.00304599	0.0054455	0.00078705	0.0039511
	3931.34	0.00241	0.00757	0.00224	0.00271	0.00278	0.00428	0.00463842	0.00276219	0.00275219	0.00520015	0.00094284	0.00366481
	3931.1	0.00242	0.00759	0.00225	0.00272	0.00279	0.00428	0.00460126	0.00251884	0.00246163	0.00491756	0.00108804	0.00338126
	3930.86	0.00242	0.00762	0.00226	0.00273	0.0028	0.00428	0.00456902	0.00230491	0.00222514	0.00464175	0.00121808	0.00315979
	3930.62	0.00242	0.00764	0.00227	0.00273	0.00281	0.00429	0.00454467	0.00214418	0.00207164	0.00440062	0.00132925	0.0030289
	3930.38	0.00242	0.00767	0.00228	0.00273	0.00281	0.00429	0.00452473	0.00204109	0.00200852	0.00421559	0.00141586	0.00298633
	3930.14	0.00242	0.00769	0.00228	0.00274	0.00282	0.00429	0.00449996	0.0019828	0.00202489	0.004102	0.00147258	0.00300496
	3929.9	0.00243	0.00771	0.00229	0.00274	0.00283	0.0043	0.0044646	0.00194912	0.00209384	0.00407589	0.00149458	0.0030399
	3929.66	0.00243	0.00774	0.0023	0.00275	0.00283	0.0043	0.00441883	0.00191872	0.00218307	0.00414669	0.00148427	0.00304587
	3929.42	0.00243	0.00776	0.00231	0.00275	0.00284	0.0043	0.00437229	0.00187663	0.00225997	0.00431362	0.00145442	0.00299006
	3929.18	0.00243	0.00779	0.00231	0.00275	0.00285	0.0043	0.00433762	0.00181773	0.00230098	0.00455744	0.00142517	0.00286375
	3928.93	0.00244	0.00781	0.00232	0.00276	0.00285	0.00431	0.00432712	0.00174324	0.00229534	0.00484461	0.0014216	0.0026821
	3928.69	0.00244	0.00783	0.00233	0.00276	0.00286	0.00431	0.00434314	0.00165979	0.00224455	0.00513029	0.0014652	0.00247529
	3928.45	0.00244	0.00786	0.00233	0.00276	0.00286	0.00431	0.00437881	0.00157292	0.00215886	0.00537172	0.00156711	0.00227651
	3928.21	0.00244	0.00788	0.00234	0.00277	0.00287	0.00431	0.00441763	0.00148759	0.00205322	0.00553609	0.00172309	0.0021075
	3927.97	0.00244	0.00791	0.00235	0.00277	0.00287	0.00432	0.00444135	0.00141004	0.00194241	0.00560826	0.00191059	0.00197452
	3927.73	0.00245	0.00793	0.00235	0.00277	0.00288	0.00432	0.00443372	0.00134938	0.00184127	0.00559047	0.0020931	0.00186829
	3927.49	0.00245	0.00796	0.00236	0.00277	0.00288	0.00432	0.00438747	0.00132017	0.00176301	0.00550079	0.00223057	0.00177218
	3927.25	0.00245	0.00798	0.00237	0.00278	0.00289	0.00432	0.00430386	0.00134065	0.00171786	0.00536331	0.0022887	0.0016693
	3927.01	0.00245	0.008	0.00237	0.00278	0.00289	0.00432	0.00419249	0.00142912	0.00171368	0.00519956	0.00225105	0.00155415
	3926.76	0.00246	0.00803	0.00238	0.00278	0.0029	0.00433	0.00406547	0.00160088	0.00175616	0.00502193	0.00212168	0.00143581
	3926.52	0.00246	0.00805	0.00238	0.00278	0.0029	0.00433	0.00393486	0.00186458	0.00184858	0.00483399	0.00192838	0.00133886
	3926.28	0.00246	0.00807	0.00239	0.00278	0.00291	0.00433	0.00380883	0.00221772	0.00198996	0.00463321	0.00171335	0.00129448
	3926.04	0.00246	0.0081	0.00239	0.00278	0.00291	0.00433	0.00369275	0.0026441	0.00217425	0.00441951	0.00152223	0.00133266
	3925.8	0.00246	0.00812	0.0024	0.00278	0.00292	0.00433	0.00359192	0.00311314	0.00238897	0.00420131	0.00139388	0.00147112
	3925.56	0.00247	0.00814	0.0024	0.00278	0.00292	0.00433	0.00351599	0.00357864	0.00261374	0.00400104	0.00134807	0.00170462
	3925.32	0.00247	0.00816	0.0024	0.00278	0.00292	0.00433	0.00348008	0.00398304	0.00282323	0.00385132	0.00137882	0.00200028
	3925.08	0.00247	0.00818	0.00241	0.00278	0.00293	0.00434	0.00350333	0.00427057	0.00299102	0.00378474	0.00145543	0.00230507
	3924.84	0.00247	0.00821	0.00241	0.00279	0.00293	0.00434	0.00360296	0.00440027	0.00310192	0.00381854	0.00153711	0.00255984
	3924.6	0.00248	0.00823	0.00242	0.00279	0.00294	0.00434	0.00378118	0.00436071	0.00315386	0.00394306	0.00158876	0.00272387
	3924.35	0.00248	0.00825	0.00242	0.00279	0.00294	0.00434	0.00401932	0.00416902	0.00316191	0.00412466	0.00159877	0.0027866
	3924.11	0.00248	0.00827	0.00242	0.00279	0.00294	0.00434	0.00428254	0.0038629	0.00314872	0.00432186	0.00157626	0.00276865
	3923.87	0.00248	0.00829	0.00242	0.00279	0.00295	0.00434	0.00452792	0.00348386	0.00313658	0.00449922	0.00154336	0.00270787
	3923.63	0.00249	0.00831	0.00243	0.00279	0.00295	0.00434	0.00471762	0.00306674	0.00313825	0.00463921	0.00152172	0.00264142
	3923.39	0.00249	0.00832	0.00243	0.00278	0.00295	0.00434	0.00482529	0.00263407	0.00315283	0.00473624	0.0015196	0.00259262
	3923.15	0.00249	0.00834	0.00243	0.00278	0.00296	0.00434	0.00484203	0.00219875	0.00316815	0.00479294	0.00153331	0.00256697
	3922.91	0.00249	0.00836	0.00243	0.00278	0.00296	0.00434	0.00477564	0.00176918	0.00316521	0.00481109	0.00155089	0.00255286
	3922.67	0.00249	0.00838	0.00244	0.00278	0.00296	0.00434	0.00464747	0.00135669	0.00312628	0.00479062	0.00156047	0.00253002
	3922.43	0.0025	0.0084	0.00244	0.00278	0.00296	0.00434	0.00448914	0.00097732	0.00304216	0.00473137	0.00155973	0.0024787
	3922.18	0.0025	0.00841	0.00244	0.00278	0.00297	0.00434	0.00433143	0.00065473	0.00291732	0.00463584	0.00155478	0.00238722
	3921.94	0.0025	0.00843	0.00244	0.00278	0.00297	0.00434	0.00420066	0.00041657	0.00277175	0.00451377	0.0015586	0.00225906
	3921.7	0.0025	0.00844	0.00244	0.00278	0.00297	0.00434	0.00411416	0.00029189	0.0026357	0.00438247	0.00158313	0.00211203
	3921.46	0.00251	0.00846	0.00244	0.00278	0.00298	0.00434	0.00407926	0.00030553	0.0025453	0.00426309	0.00163113	0.0019753
	3921.22	0.00251	0.00847	0.00244	0.00278	0.00298	0.00434	0.00409264	0.00047405	0.00253395	0.00417646	0.00169176	0.00188416
	3920.98	0.00251	0.00848	0.00244	0.00278	0.00298	0.00434	0.00414551	0.00079728	0.00262107	0.00413667	0.00174233	0.00187079
	3920.74	0.00251	0.0085	0.00244	0.00278	0.00298	0.00434	0.00422358	0.00124864	0.00280244	0.00414366	0.0017531	0.00195193
	3920.5	0.00251	0.00851	0.00244	0.00278	0.00299	0.00435	0.0043084	0.00177028	0.00304218	0.00418165	0.00170112	0.00211556
	3920.26	0.00251	0.00852	0.00244	0.00278	0.00299	0.00435	0.00438316	0.00227212	0.00327194	0.00422181	0.00158403	0.00231503
	3920.01	0.00252	0.00853	0.00244	0.00278	0.00299	0.00435	0.00443576	0.0026547	0.00341173	0.00423287	0.00142846	0.00247639
	3919.77	0.00252	0.00854	0.00244	0.00278	0.00299	0.00435	0.00446291	0.00284545	0.00340151	0.00420035	0.00128393	0.0025288
	3919.53	0.00252	0.00855	0.00244	0.00279	0.003	0.00435	0.00446967	0.00282921	0.00322938	0.0041305	0.00120282	0.00243475
	3919.29	0.00252	0.00856	0.00244	0.00279	0.003	0.00435	0.00446485	0.00265174	0.00293451	0.00404609	0.00121782	0.00220861
	3919.05	0.00252	0.00857	0.00243	0.00279	0.003	0.00435	0.00445589	0.00239905	0.00258686	0.00396886	0.0013364	0.00190677
	3918.81	0.00252	0.00858	0.00243	0.00279	0.00301	0.00435	0.00444659	0.00216682	0.00226151	0.00391255	0.00154653	0.00160514
	3918.57	0.00253	0.00859	0.00243	0.00279	0.00301	0.00435	0.00443831	0.00204153	0.00202045	0.00387961	0.00182669	0.00137816
	3918.33	0.00253	0.00859	0.00243	0.00279	0.00301	0.00435	0.00443316	0.00209148	0.0019037	0.00386718	0.00215388	0.00128388
	3918.09	0.00253	0.0086	0.00243	0.00279	0.00302	0.00435	0.00443663	0.00235886	0.00192677	0.00387363	0.0025039	0.001356
	3917.85	0.00253	0.0086	0.00243	0.0028	0.00302	0.00435	0.00445995	0.00284632	0.00207704	0.00390721	0.002849	0.00159206
	3917.6	0.00253	0.00861	0.00242	0.0028	0.00302	0.00435	0.00451853	0.003502	0.00231381	0.00398843	0.00315107	0.00194821
	3917.36	0.00253	0.00861	0.00242	0.0028	0.00303	0.00435	0.00462585	0.00421209	0.00257187	0.00414611	0.00336306	0.00234176
	3917.12	0.00253	0.00862	0.00242	0.0028	0.00303	0.00435	0.00478448	0.00481961	0.0027804	0.00439987	0.00344013	0.00267325
	3916.88	0.00253	0.00862	0.00242	0.00281	0.00304	0.00435	0.0049743	0.00517644	0.00288981	0.00473679	0.00335664	0.00286863
	3916.64	0.00253	0.00862	0.00241	0.00281	0.00304	0.00435	0.00515584	0.00520407	0.00288986	0.00510264	0.00312418	0.00290626
	3916.4	0.00253	0.00862	0.00241	0.00281	0.00305	0.00436	0.0052876	0.00491701	0.00280517	0.00542164	0.00278765	0.00281875
	3916.16	0.00253	0.00863	0.00241	0.00282	0.00305	0.00436	0.0053431	0.0043979	0.00267733	0.00562788	0.00241191	0.00266363
	3915.92	0.00253	0.00863	0.00241	0.00282	0.00305	0.00436	0.0053159	0.00375455	0.0025407	0.00568763	0.00205832	0.00249264
	3915.68	0.00253	0.00863	0.0024	0.00283	0.00306	0.00436	0.00521814	0.0030802	0.00241462	0.005603	0.00177296	0.00233294
	3915.43	0.00253	0.00863	0.0024	0.00283	0.00306	0.00436	0.00507223	0.00244171	0.00230307	0.00540667	0.00158022	0.00219241
	3915.19	0.00253	0.00863	0.0024	0.00284	0.00307	0.00436	0.0049038	0.00188044	0.00220385	0.00514917	0.00148106	0.00206815
	3914.95	0.00253	0.00863	0.0024	0.00284	0.00307	0.00437	0.00473355	0.0014181	0.002113	0.00488629	0.00145965	0.00195889
	3914.71	0.00253	0.00863	0.00239	0.00285	0.00308	0.00437	0.00457467	0.00106554	0.00203002	0.00466775	0.00148733	0.00186969
	3914.47	0.00252	0.00862	0.00239	0.00286	0.00309	0.00437	0.00442985	0.00082742	0.00195844	0.00452688	0.00153164	0.00181391
	3914.23	0.00252	0.00862	0.00239	0.00286	0.00309	0.00437	0.00429165	0.00070267	0.00190441	0.00447173	0.0015672	0.00180395
	3913.99	0.00252	0.00862	0.00238	0.00287	0.0031	0.00437	0.0041491	0.00068296	0.00187206	0.00448662	0.00158217	0.00184286
	3913.75	0.00252	0.00862	0.00238	0.00288	0.0031	0.00438	0.00399316	0.00075017	0.00186124	0.00453787	0.00157912	0.00191608
	3913.51	0.00252	0.00861	0.00238	0.00288	0.00311	0.00438	0.00382251	0.00087459	0.00186735	0.00458435	0.0015741	0.00199446
	3913.26	0.00252	0.00861	0.00238	0.00289	0.00312	0.00438	0.00364954	0.0010174	0.00188174	0.00459476	0.0015865	0.00204079
	3913.02	0.00251	0.0086	0.00237	0.0029	0.00312	0.00439	0.00349533	0.00113815	0.00189606	0.00455294	0.00163122	0.00202584
	3912.78	0.00251	0.0086	0.00237	0.00291	0.00313	0.00439	0.00338467	0.00120192	0.00190283	0.00446399	0.00171317	0.00193786
	3912.54	0.00251	0.0086	0.00237	0.00291	0.00314	0.00439	0.00333727	0.00118982	0.00189799	0.00434827	0.00182539	0.00178889
	3912.3	0.00251	0.00859	0.00236	0.00292	0.00314	0.0044	0.0033618	0.00110428	0.00188237	0.00423526	0.00195142	0.00161251
	3912.06	0.0025	0.00859	0.00236	0.00293	0.00315	0.0044	0.00345242	0.00096896	0.00185861	0.00415331	0.00207324	0.0014507
	3911.82	0.0025	0.00858	0.00236	0.00294	0.00316	0.0044	0.00358983	0.00082452	0.00183382	0.00412348	0.00217439	0.0013423
	3911.58	0.0025	0.00857	0.00236	0.00295	0.00316	0.00441	0.00374799	0.00071603	0.00181673	0.00415215	0.00224328	0.00131179
	3911.34	0.00249	0.00857	0.00236	0.00296	0.00317	0.00441	0.00390133	0.00068336	0.00181877	0.0042344	0.00227468	0.00136504
	3911.1	0.00249	0.00856	0.00235	0.00297	0.00318	0.00441	0.00402846	0.00074782	0.00185053	0.00435298	0.00226721	0.00149183
	3910.85	0.00248	0.00856	0.00235	0.00298	0.00319	0.00442	0.00411721	0.00090782	0.00192107	0.0044848	0.00222141	0.00167209
	3910.61	0.00248	0.00855	0.00235	0.00299	0.00319	0.00442	0.00416319	0.00113822	0.00203056	0.00460769	0.00213643	0.00188165
	3910.37	0.00248	0.00854	0.00235	0.003	0.0032	0.00443	0.00416819	0.00139596	0.00217139	0.00470178	0.00201434	0.00209943
	3910.13	0.00247	0.00854	0.00235	0.00301	0.00321	0.00443	0.00413929	0.0016319	0.00232626	0.00475937	0.00185935	0.00230691
	3909.89	0.00247	0.00853	0.00234	0.00302	0.00322	0.00443	0.00408612	0.00180118	0.00247235	0.0047824	0.00168076	0.0024893
	3909.65	0.00246	0.00853	0.00234	0.00303	0.00322	0.00444	0.00402056	0.00187533	0.00258597	0.00478463	0.00149322	0.00263411
	3909.41	0.00246	0.00852	0.00234	0.00304	0.00323	0.00444	0.00395889	0.00184655	0.00265074	0.00478587	0.00131421	0.00273269
	3909.17	0.00245	0.00851	0.00234	0.00305	0.00324	0.00445	0.00391882	0.00172832	0.00266057	0.00480611	0.00116078	0.00278115
	3908.93	0.00245	0.00851	0.00234	0.00306	0.00325	0.00445	0.00391582	0.00154889	0.00261984	0.00486053	0.00104592	0.00278179
	3908.68	0.00244	0.0085	0.00234	0.00307	0.00325	0.00445	0.00396305	0.00134586	0.00254268	0.00495275	0.00097373	0.00274475
	3908.44	0.00244	0.0085	0.00234	0.00308	0.00326	0.00446	0.00406254	0.00115555	0.00244847	0.00507328	0.00094162	0.00268499
	3908.2	0.00243	0.00849	0.00234	0.00309	0.00327	0.00446	0.00420693	0.00101137	0.00235886	0.00520344	0.00094119	0.00262085
	3907.96	0.00243	0.00848	0.00233	0.0031	0.00327	0.00447	0.00437932	0.0009382	0.0022952	0.00532028	0.00096362	0.00256838
	3907.72	0.00242	0.00848	0.00233	0.00312	0.00328	0.00447	0.00455819	0.00095471	0.00227823	0.00540425	0.00100574	0.00254023
	3907.48	0.00242	0.00847	0.00233	0.00313	0.00329	0.00448	0.00472081	0.00107473	0.002329	0.00543947	0.00107165	0.00254452
	3907.24	0.00241	0.00847	0.00233	0.00314	0.0033	0.00448	0.00484743	0.00130662	0.00246841	0.00541957	0.00117514	0.00258647
	3907	0.00241	0.00846	0.00233	0.00315	0.0033	0.00448	0.00492278	0.00165275	0.00271266	0.0053431	0.00133538	0.00266649
	3906.76	0.0024	0.00846	0.00233	0.00316	0.00331	0.00449	0.00493464	0.00210278	0.00306734	0.00521223	0.00157072	0.00278375
	3906.51	0.00239	0.00845	0.00233	0.00317	0.00332	0.00449	0.0048757	0.00262887	0.00351941	0.00503231	0.00188915	0.00293108
	3906.27	0.00239	0.00845	0.00233	0.00318	0.00332	0.00449	0.00474597	0.00318526	0.00403316	0.00481383	0.00227933	0.00309554
	3906.03	0.00238	0.00844	0.00233	0.00319	0.00333	0.0045	0.00455442	0.00371844	0.00455643	0.0045722	0.00270652	0.00325959
	3905.79	0.00238	0.00844	0.00233	0.0032	0.00333	0.0045	0.0043219	0.00418409	0.00503587	0.00432973	0.00311874	0.00340717
	3905.55	0.00237	0.00844	0.00233	0.00321	0.00334	0.0045	0.00407969	0.00456316	0.00543623	0.00411287	0.00345825	0.00352916
	3905.31	0.00237	0.00843	0.00233	0.00322	0.00334	0.00451	0.00386459	0.0048657	0.00574573	0.00395017	0.00367297	0.00362757
	3905.07	0.00236	0.00843	0.00234	0.00323	0.00335	0.00451	0.00371479	0.00512144	0.00597356	0.00386987	0.00372502	0.00371255
	3904.83	0.00236	0.00843	0.00234	0.00324	0.00336	0.00451	0.00366595	0.00536092	0.00613236	0.00389466	0.00359538	0.00379702
	3904.59	0.00235	0.00842	0.00234	0.00324	0.00336	0.00452	0.00373636	0.00559491	0.00622409	0.00402893	0.00329829	0.00388427
	3904.35	0.00235	0.00842	0.00234	0.00325	0.00336	0.00452	0.00391065	0.00580273	0.00623543	0.00424556	0.00289045	0.00396341
	3904.1	0.00234	0.00842	0.00234	0.00326	0.00337	0.00452	0.00413149	0.00594453	0.00614637	0.00447981	0.00247365	0.00400452
	3903.86	0.00234	0.00842	0.00234	0.00327	0.00337	0.00452	0.00431893	0.00599216	0.00595942	0.00465474	0.00215797	0.00398524
	3903.62	0.00233	0.00842	0.00234	0.00328	0.00338	0.00452	0.00441291	0.00595795	0.0057101	0.00472255	0.00201581	0.00390447
	3903.38	0.00233	0.00841	0.00234	0.00328	0.00338	0.00453	0.00439743	0.00589085	0.00545748	0.00468029	0.00206145	0.00378918
	3903.14	0.00232	0.00841	0.00235	0.00329	0.00338	0.00453	0.00429718	0.00585042	0.00526363	0.00456073	0.00226894	0.00368599
	3902.9	0.00232	0.00841	0.00235	0.0033	0.00339	0.00453	0.00415572	0.00588216	0.00517564	0.00441348	0.00259202	0.0036463
	3902.66	0.00231	0.00841	0.00235	0.0033	0.00339	0.00453	0.00402919	0.00599812	0.00521928	0.00429322	0.00297585	0.00371485
	3902.42	0.00231	0.00841	0.00235	0.00331	0.00339	0.00453	0.00397681	0.00616286	0.0053839	0.00425693	0.00334744	0.00391561
	3902.18	0.0023	0.00841	0.00235	0.00332	0.00339	0.00453	0.00405273	0.00628121	0.00560728	0.00435297	0.00361448	0.00422422
	3901.93	0.0023	0.00842	0.00236	0.00332	0.00339	0.00453	0.00426783	0.006224	0.00577465	0.00458465	0.003679	0.00455104
	3901.69	0.0023	0.00842	0.00236	0.00333	0.00339	0.00453	0.00456434	0.00590124	0.00576625	0.00488772	0.00349655	0.00476208
	3901.45	0.00229	0.00842	0.00236	0.00333	0.00339	0.00453	0.0048374	0.00533725	0.00553386	0.00515665	0.00311137	0.0047582
	3901.21	0.00229	0.00842	0.00236	0.00334	0.00339	0.00453	0.0050012	0.00466221	0.00512945	0.00531241	0.0026324	0.0045338
	3900.97	0.00229	0.00842	0.00236	0.00334	0.00339	0.00453	0.00502795	0.00402908	0.00465754	0.0053352	0.00216387	0.00416384
	3900.73	0.00228	0.00842	0.00237	0.00334	0.00339	0.00453	0.00493247	0.00355149	0.00421636	0.00524496	0.00176836	0.00374949
	3900.49	0.00228	0.00843	0.00237	0.00335	0.00339	0.00453	0.00474393	0.00329666	0.00387283	0.00507469	0.00147081	0.00338385
	3900.25	0.00228	0.00843	0.00237	0.00335	0.00339	0.00453	0.00449731	0.00329656	0.00366344	0.00485631	0.00127771	0.00314215
	3900.01	0.00228	0.00843	0.00237	0.00335	0.00339	0.00452	0.00423371	0.00355582	0.00360005	0.00462304	0.00118875	0.00308148
	3899.77	0.00227	0.00844	0.00238	0.00335	0.00339	0.00452	0.00401098	0.00403566	0.00366385	0.00441179	0.00120207	0.00322435
	3899.52	0.00227	0.00844	0.00238	0.00335	0.00339	0.00452	0.00389945	0.00462884	0.00380101	0.00426631	0.00130707	0.00353581
	3899.28	0.00227	0.00844	0.00238	0.00336	0.00339	0.00452	0.00395171	0.00516593	0.00392622	0.00421678	0.00147709	0.00390341
	3899.04	0.00227	0.00845	0.00239	0.00336	0.00338	0.00451	0.00416	0.00547752	0.00395952	0.00426347	0.00167096	0.0041797
	3898.8	0.00227	0.00845	0.00239	0.00336	0.00338	0.00451	0.00444339	0.00548063	0.00386895	0.00436618	0.00185244	0.00425958
	3898.56	0.00227	0.00846	0.00239	0.00336	0.00338	0.00451	0.00470108	0.00520192	0.00367397	0.00447879	0.00200606	0.00413172
	3898.32	0.00227	0.00846	0.0024	0.00336	0.00337	0.0045	0.00485802	0.0047261	0.00342085	0.00456883	0.00213157	0.00385747
	3898.08	0.00227	0.00847	0.0024	0.00336	0.00337	0.0045	0.00488367	0.0041403	0.00314939	0.00462502	0.0022374	0.00351967
	3897.84	0.00227	0.00847	0.0024	0.00336	0.00337	0.0045	0.00478147	0.00351203	0.00288321	0.00464829	0.00232888	0.0031896
	3897.6	0.00227	0.00848	0.00241	0.00336	0.00336	0.00449	0.00457646	0.00289151	0.00263312	0.00464377	0.00240642	0.00291452
	3897.35	0.00227	0.00848	0.00241	0.00335	0.00336	0.00449	0.00430553	0.00232148	0.00240427	0.00461694	0.00246626	0.00271685
	3897.11	0.00227	0.00849	0.00241	0.00335	0.00335	0.00448	0.00401227	0.00184188	0.00220157	0.00457354	0.00250463	0.00260145
	3896.87	0.00228	0.0085	0.00242	0.00335	0.00335	0.00448	0.00373878	0.00148581	0.00203142	0.00452124	0.00252036	0.00255873
	3896.63	0.00228	0.0085	0.00242	0.00335	0.00334	0.00447	0.00352023	0.00127163	0.001901	0.00447087	0.0025189	0.00257262
	3896.39	0.00228	0.00851	0.00242	0.00335	0.00334	0.00447	0.00337906	0.00119627	0.00181485	0.004437	0.00250932	0.0026222
	3896.15	0.00228	0.00851	0.00243	0.00334	0.00333	0.00446	0.00332189	0.00123383	0.00176979	0.00443374	0.00250257	0.00268559
	3895.91	0.00229	0.00852	0.00243	0.00334	0.00333	0.00446	0.00334322	0.00134185	0.00175683	0.00447149	0.0025059	0.00274148
	3895.67	0.00229	0.00852	0.00243	0.00334	0.00332	0.00445	0.00342523	0.00147136	0.00176161	0.00455066	0.00251965	0.00277008
	3895.43	0.00229	0.00853	0.00244	0.00333	0.00331	0.00445	0.00354578	0.00158294	0.00177109	0.00465904	0.00253597	0.00275583
	3895.18	0.0023	0.00854	0.00244	0.00333	0.00331	0.00444	0.00368437	0.00165873	0.00177793	0.00477517	0.00253785	0.00269208
	3894.94	0.0023	0.00854	0.00244	0.00333	0.0033	0.00443	0.00382448	0.00170253	0.00178631	0.00486836	0.00250581	0.00258424
	3894.7	0.0023	0.00855	0.00245	0.00332	0.00329	0.00443	0.00395828	0.00173784	0.00180889	0.00491246	0.00242235	0.00244889
	3894.46	0.00231	0.00855	0.00245	0.00332	0.00329	0.00442	0.00408269	0.00179139	0.00186083	0.0048906	0.00228143	0.00231065
	3894.22	0.00231	0.00856	0.00246	0.00332	0.00328	0.00442	0.00419852	0.00188137	0.00195168	0.00480419	0.00209127	0.00219691
	3893.98	0.00232	0.00856	0.00246	0.00331	0.00328	0.00441	0.00430772	0.00201014	0.00207874	0.00467371	0.0018777	0.00212795
	3893.74	0.00232	0.00857	0.00246	0.00331	0.00327	0.0044	0.00440978	0.00216415	0.00222442	0.00453208	0.00167478	0.00210845
	3893.5	0.00233	0.00857	0.00247	0.0033	0.00326	0.0044	0.00450041	0.00232499	0.00236421	0.0044127	0.00151561	0.0021279
	3893.26	0.00234	0.00858	0.00247	0.0033	0.00326	0.00439	0.0045734	0.0024821	0.00247676	0.0043358	0.00141909	0.00216585
	3893.02	0.00234	0.00858	0.00248	0.0033	0.00325	0.00438	0.00461767	0.00264159	0.00255539	0.00430351	0.00138453	0.00220143
	3892.77	0.00235	0.00859	0.00248	0.00329	0.00324	0.00438	0.00461894	0.00282571	0.0026126	0.00430294	0.0013939	0.00222617
	3892.53	0.00235	0.00859	0.00248	0.00329	0.00324	0.00437	0.00455806	0.00306421	0.00267827	0.00431225	0.0014187	0.00224376
	3892.29	0.00236	0.00859	0.00249	0.00328	0.00323	0.00437	0.00441661	0.00338169	0.0027953	0.00431283	0.00142594	0.00227699
	3892.05	0.00237	0.0086	0.00249	0.00328	0.00322	0.00436	0.00418354	0.0037781	0.0030062	0.00429402	0.00139181	0.00236016
	3891.81	0.00237	0.0086	0.0025	0.00328	0.00322	0.00435	0.00388091	0.00420839	0.00333124	0.00426795	0.0013124	0.00252842
	3891.57	0.00238	0.0086	0.0025	0.00327	0.00321	0.00435	0.00358243	0.00457345	0.00373907	0.00427144	0.00121843	0.00279148
	3891.33	0.00239	0.0086	0.0025	0.00327	0.00321	0.00434	0.00340229	0.00475238	0.00413346	0.00435044	0.00117095	0.00311287
	3891.09	0.0024	0.00861	0.00251	0.00327	0.0032	0.00434	0.00343281	0.00466895	0.0043938	0.0045231	0.00122874	0.00341647
	3890.85	0.0024	0.00861	0.00251	0.00326	0.0032	0.00433	0.00367673	0.00434054	0.00444375	0.00476112	0.0014076	0.00362872
	3890.6	0.00241	0.00861	0.00252	0.00326	0.00319	0.00432	0.00405464	0.00385588	0.0042875	0.00500827	0.00167556	0.00371625
	3890.36	0.00242	0.00861	0.00252	0.00326	0.00319	0.00432	0.00446502	0.0033157	0.00398839	0.00521216	0.00197212	0.00369075
	3890.12	0.00243	0.00861	0.00252	0.00325	0.00318	0.00431	0.00482521	0.00279434	0.00362977	0.00534103	0.00224023	0.00359114
	3889.88	0.00243	0.00861	0.00253	0.00325	0.00318	0.00431	0.00508424	0.00233428	0.00328324	0.00538339	0.00243389	0.00346008
	3889.64	0.00244	0.00861	0.00253	0.00325	0.00317	0.0043	0.0052166	0.00195556	0.00300037	0.00534	0.00252621	0.00333157
	3889.4	0.00245	0.00861	0.00254	0.00325	0.00317	0.0043	0.00522228	0.00166987	0.00280728	0.00522282	0.00250684	0.00322825
	3889.16	0.00246	0.00861	0.00254	0.00325	0.00317	0.00429	0.00511876	0.00148316	0.00270565	0.00505008	0.00238172	0.00315791
	3888.92	0.00246	0.00861	0.00255	0.00324	0.00316	0.00429	0.00493981	0.00139827	0.00267625	0.00484445	0.00217459	0.00311666
	3888.68	0.00247	0.00861	0.00255	0.00324	0.00316	0.00428	0.00472812	0.00140993	0.00268383	0.00463032	0.0019237	0.00308879
	3888.43	0.00248	0.0086	0.00255	0.00324	0.00316	0.00428	0.00452572	0.00150508	0.0026901	0.00442928	0.00167538	0.00305471
	3888.19	0.00248	0.0086	0.00256	0.00324	0.00316	0.00427	0.00436211	0.00166152	0.00266952	0.0042566	0.00147425	0.00299727
	3887.95	0.00249	0.0086	0.00256	0.00324	0.00315	0.00427	0.00424987	0.00185725	0.00261911	0.00412031	0.00135335	0.00290731
	3887.71	0.0025	0.00859	0.00257	0.00324	0.00315	0.00426	0.0041872	0.00207803	0.00256092	0.00402437	0.00132804	0.00278511
	3887.47	0.00251	0.00859	0.00257	0.00324	0.00315	0.00426	0.00416426	0.00232665	0.00253507	0.00397029	0.00139413	0.00264025
	3887.23	0.00251	0.00858	0.00257	0.00324	0.00315	0.00426	0.00417436	0.00262371	0.00259315	0.00396201	0.00153289	0.00248863
	3886.99	0.00252	0.00858	0.00258	0.00325	0.00315	0.00425	0.00422108	0.00300676	0.00278639	0.00400995	0.00171031	0.00235207
	3886.75	0.00253	0.00857	0.00258	0.00325	0.00315	0.00425	0.00431877	0.00351712	0.00315984	0.00412877	0.00188186	0.00226081
	3886.51	0.00253	0.00857	0.00258	0.00325	0.00315	0.00425	0.00448828	0.00417858	0.00373706	0.00433326	0.00198576	0.00225856
	3886.27	0.00254	0.00856	0.00259	0.00325	0.00315	0.00425	0.00474013	0.0049583	0.00449084	0.00461846	0.00195598	0.00239551
	3886.02	0.00254	0.00855	0.00259	0.00325	0.00315	0.00424	0.0050419	0.00572355	0.00531104	0.0049347	0.00174843	0.00271074
	3885.78	0.00255	0.00855	0.00259	0.00326	0.00315	0.00424	0.00529808	0.00625851	0.00600331	0.00517584	0.00139492	0.00318135
	3885.54	0.00255	0.00854	0.0026	0.00326	0.00315	0.00424	0.00539962	0.00638878	0.0063896	0.00523706	0.00101824	0.00370747
	3885.3	0.00256	0.00853	0.0026	0.00326	0.00316	0.00424	0.00530926	0.00611345	0.00641917	0.00509685	0.00076468	0.00415651
	3885.06	0.00256	0.00852	0.0026	0.00327	0.00316	0.00424	0.00508468	0.00559204	0.00618103	0.0048238	0.00071273	0.00444227
	3884.82	0.00257	0.00851	0.00261	0.00327	0.00316	0.00423	0.00481726	0.00501093	0.00580415	0.00450712	0.00085612	0.00454516
	3884.58	0.00257	0.0085	0.00261	0.00328	0.00316	0.00423	0.00457909	0.00449686	0.00538179	0.0042122	0.00113922	0.00448794
	3884.34	0.00258	0.00849	0.00261	0.00328	0.00317	0.00423	0.0044138	0.00410277	0.00495819	0.00397679	0.00149505	0.00430429
	3884.1	0.00258	0.00848	0.00262	0.00329	0.00317	0.00423	0.00433977	0.00383025	0.00454352	0.0038209	0.00186116	0.00402775
	3883.85	0.00258	0.00847	0.00262	0.0033	0.00317	0.00423	0.00435647	0.00364931	0.00413738	0.00375544	0.00218162	0.00369141
	3883.61	0.00259	0.00846	0.00262	0.0033	0.00318	0.00423	0.00444369	0.00351343	0.00374146	0.00378339	0.00241047	0.00333095
	3883.37	0.00259	0.00845	0.00262	0.00331	0.00318	0.00423	0.00456324	0.00337601	0.00337102	0.00389347	0.00252401	0.00298617
	3883.13	0.00259	0.00844	0.00263	0.00332	0.00319	0.00423	0.00467056	0.00320582	0.00305137	0.00406191	0.00252556	0.00269047
	3882.89	0.00259	0.00842	0.00263	0.00332	0.00319	0.00423	0.00472761	0.00300163	0.00281233	0.00425466	0.00244824	0.0024651
	3882.65	0.0026	0.00841	0.00263	0.00333	0.0032	0.00423	0.00472075	0.00279314	0.00267667	0.00443962	0.00233977	0.0023137
	3882.41	0.0026	0.0084	0.00263	0.00334	0.00321	0.00423	0.00466036	0.00263064	0.00265504	0.00459517	0.00224546	0.00222725
	3882.17	0.0026	0.00839	0.00263	0.00335	0.00321	0.00423	0.00457337	0.00256767	0.00274886	0.00471251	0.00219467	0.00219482
	3881.93	0.0026	0.00837	0.00264	0.00336	0.00322	0.00423	0.00449065	0.00265286	0.00295545	0.00479278	0.00219913	0.00221119
	3881.68	0.0026	0.00836	0.00264	0.00336	0.00323	0.00423	0.00444162	0.00292471	0.00327405	0.00484109	0.00225823	0.00228618
	3881.44	0.0026	0.00835	0.00264	0.00337	0.00323	0.00423	0.00444951	0.00340375	0.00370311	0.00486319	0.00236251	0.00244024
	3881.2	0.0026	0.00833	0.00264	0.00338	0.00324	0.00423	0.00453358	0.00408151	0.00422961	0.0048658	0.00249812	0.00270123
	3880.96	0.0026	0.00832	0.00264	0.00339	0.00325	0.00423	0.00470329	0.00489124	0.00480949	0.0048568	0.00264165	0.00308415
	3880.72	0.0026	0.00831	0.00264	0.0034	0.00326	0.00424	0.00494879	0.00567808	0.00534572	0.00484565	0.00275717	0.00356887
	3880.48	0.0026	0.00829	0.00264	0.00341	0.00327	0.00424	0.00523224	0.00621411	0.00569751	0.0048446	0.00279768	0.00407321
	3880.24	0.00259	0.00828	0.00264	0.00342	0.00327	0.00424	0.00549413	0.00629679	0.00573972	0.00485996	0.00272455	0.00447272
	3880	0.00259	0.00827	0.00265	0.00343	0.00328	0.00424	0.00568675	0.00588048	0.00544568	0.00488511	0.00253536	0.0046651
	3879.76	0.00259	0.00825	0.00265	0.00344	0.00329	0.00424	0.00580104	0.00510459	0.00489978	0.00490873	0.00226634	0.00462592
	3879.52	0.00259	0.00824	0.00265	0.00346	0.0033	0.00424	0.00585636	0.00418462	0.00423685	0.00492088	0.00197267	0.00440629
	3879.27	0.00258	0.00822	0.00265	0.00347	0.00331	0.00425	0.00587615	0.0033008	0.00356769	0.00492081	0.00170343	0.00407836
	3879.03	0.00258	0.00821	0.00265	0.00348	0.00332	0.00425	0.00587122	0.00255976	0.00295879	0.00491265	0.00149514	0.00370485
	3878.79	0.00258	0.0082	0.00265	0.00349	0.00333	0.00425	0.0058452	0.00200561	0.00244067	0.00490548	0.00136757	0.00332656
	3878.55	0.00257	0.00819	0.00265	0.0035	0.00334	0.00425	0.00579664	0.00164457	0.00202554	0.00490717	0.00132831	0.00296731
	3878.31	0.00257	0.00817	0.00265	0.00351	0.00335	0.00425	0.00572397	0.00145848	0.00171429	0.00492489	0.00136994	0.00264207
	3878.07	0.00256	0.00816	0.00265	0.00352	0.00336	0.00425	0.00562771	0.00141357	0.00150322	0.00495995	0.00147038	0.00235895
	3877.83	0.00256	0.00815	0.00265	0.00354	0.00337	0.00426	0.00551363	0.00146636	0.00138154	0.005007	0.0015935	0.00212401
	3877.59	0.00256	0.00814	0.00265	0.00355	0.00338	0.00426	0.00538895	0.00156993	0.00133157	0.00505282	0.00169792	0.0019388
	3877.35	0.00255	0.00812	0.00265	0.00356	0.00339	0.00426	0.00526356	0.00168415	0.00132868	0.00508054	0.00175016	0.00180245
	3877.1	0.00255	0.00811	0.00265	0.00357	0.0034	0.00426	0.00514513	0.00178416	0.00134804	0.00507443	0.00173408	0.00170975
	3876.86	0.00254	0.0081	0.00265	0.00358	0.00341	0.00426	0.0050381	0.00186457	0.00136989	0.00502717	0.00165997	0.00165432
	3876.62	0.00254	0.00809	0.00265	0.0036	0.00342	0.00427	0.0049439	0.00193716	0.00138807	0.00494076	0.00155877	0.00163136
	3876.38	0.00253	0.00808	0.00265	0.00361	0.00343	0.00427	0.00485951	0.0020261	0.00141409	0.00482742	0.00147323	0.00164131
	3876.14	0.00252	0.00807	0.00265	0.00362	0.00344	0.00427	0.0047825	0.00216022	0.00147377	0.0047045	0.00144324	0.00168907
	3875.9	0.00252	0.00806	0.00265	0.00363	0.00346	0.00427	0.00470833	0.00237041	0.0016057	0.00458923	0.00149478	0.00178604
	3875.66	0.00251	0.00805	0.00265	0.00364	0.00347	0.00427	0.00463443	0.00268611	0.00185234	0.00449383	0.00163559	0.00194895
	3875.42	0.00251	0.00805	0.00265	0.00366	0.00348	0.00428	0.00456005	0.00313466	0.00225391	0.00442782	0.00185412	0.00219733
	3875.18	0.0025	0.00804	0.00265	0.00367	0.00349	0.00428	0.00448468	0.00373376	0.002837	0.00439575	0.002121	0.00254964
	3874.93	0.00249	0.00803	0.00265	0.00368	0.0035	0.00428	0.00441183	0.00447485	0.00359649	0.00440342	0.00238943	0.00301474
	3874.69	0.00249	0.00803	0.00265	0.00369	0.00351	0.00428	0.00434853	0.00529335	0.0044711	0.00445593	0.00259833	0.00357517
	3874.45	0.00248	0.00802	0.00265	0.00371	0.00352	0.00428	0.00430687	0.00604413	0.00532074	0.00455663	0.00268553	0.00417068
	3874.21	0.00248	0.00802	0.00265	0.00372	0.00353	0.00428	0.00429487	0.00652213	0.00594852	0.00469531	0.00261542	0.00469581
	3873.97	0.00247	0.00801	0.00265	0.00373	0.00354	0.00429	0.0043127	0.00656061	0.00618875	0.00484215	0.00241144	0.00504024
	3873.73	0.00246	0.00801	0.00265	0.00374	0.00355	0.00429	0.00434624	0.00614129	0.00600827	0.00495833	0.00215062	0.00514931
	3873.49	0.00246	0.00801	0.00265	0.00375	0.00356	0.00429	0.00437826	0.00540614	0.00551529	0.00501929	0.0019225	0.00505009
	3873.25	0.00245	0.008	0.00265	0.00376	0.00358	0.00429	0.00439718	0.00455759	0.00487421	0.00501792	0.0017857	0.00481378
	3873.01	0.00245	0.008	0.00265	0.00378	0.00359	0.00429	0.00440046	0.00376698	0.00422205	0.00496141	0.00175698	0.00451451
	3872.77	0.00244	0.008	0.00265	0.00379	0.0036	0.00429	0.00439064	0.00313867	0.00364141	0.00485771	0.0018292	0.00420379
	3872.52	0.00244	0.008	0.00265	0.0038	0.00361	0.00429	0.00436921	0.00272114	0.00317048	0.00471371	0.00198264	0.00391054
	3872.28	0.00243	0.00801	0.00265	0.00381	0.00362	0.00429	0.00433651	0.0025201	0.00282269	0.00453346	0.00219679	0.00364998
	3872.04	0.00243	0.00801	0.00265	0.00382	0.00363	0.0043	0.00428686	0.00251477	0.00260008	0.00431913	0.0024506	0.00342845
	3871.8	0.00242	0.00801	0.00265	0.00383	0.00364	0.0043	0.00421043	0.0026674	0.00250379	0.00407121	0.00272771	0.00325252
	3871.56	0.00242	0.00802	0.00266	0.00384	0.00365	0.0043	0.0040906	0.00293735	0.00253633	0.00378995	0.00301479	0.00313012
	3871.32	0.00241	0.00802	0.00266	0.00385	0.00366	0.0043	0.00391188	0.00329673	0.00270638	0.00347713	0.00330521	0.00307235
	3871.08	0.00241	0.00803	0.00266	0.00386	0.00367	0.0043	0.00366097	0.00374799	0.00302951	0.00314019	0.00359194	0.00309693
	3870.84	0.0024	0.00803	0.00266	0.00387	0.00368	0.0043	0.00334158	0.00432846	0.00352563	0.0027989	0.00386238	0.00322577
	3870.6	0.0024	0.00804	0.00267	0.00388	0.00369	0.0043	0.00298532	0.00509859	0.00420624	0.00249891	0.00408271	0.00348308
	3870.35	0.0024	0.00805	0.00267	0.00389	0.0037	0.0043	0.00266963	0.00609549	0.0050414	0.0023237	0.00418581	0.00387235
	3870.11	0.00239	0.00806	0.00267	0.0039	0.00371	0.0043	0.00252336	0.00724654	0.00590961	0.00238795	0.00407642	0.00434872
	3869.87	0.00239	0.00807	0.00267	0.00391	0.00372	0.0043	0.00265866	0.00830445	0.0065891	0.00276124	0.00368437	0.00479139
	3869.63	0.00239	0.00808	0.00268	0.00392	0.00373	0.00431	0.00305773	0.00892758	0.00684915	0.00336868	0.00304685	0.00504771
	3869.39	0.00239	0.0081	0.00268	0.00393	0.00374	0.00431	0.00354195	0.00891024	0.00661121	0.00400154	0.00231984	0.00502285
	3869.15	0.00238	0.00811	0.00269	0.00394	0.00375	0.00431	0.00392104	0.00831848	0.0059903	0.00448109	0.00167689	0.00474434
	3868.91	0.00238	0.00812	0.00269	0.00395	0.00376	0.00431	0.00411487	0.00738178	0.0051786	0.00475674	0.00121541	0.00430719
	3868.67	0.00238	0.00814	0.00269	0.00396	0.00377	0.00431	0.00414253	0.00632904	0.00433484	0.00486866	0.00095105	0.00381059
	3868.43	0.00238	0.00815	0.0027	0.00397	0.00378	0.00431	0.00406134	0.00531314	0.00355172	0.00488018	0.00085502	0.00332114
	3868.19	0.00238	0.00817	0.0027	0.00398	0.00379	0.00431	0.00392931	0.00441628	0.00287582	0.00484615	0.00088395	0.0028792
	3867.94	0.00238	0.00819	0.00271	0.00399	0.0038	0.00431	0.00379039	0.00367325	0.00232875	0.00480223	0.00099631	0.0025055
	3867.7	0.00238	0.00821	0.00272	0.004	0.00381	0.00431	0.00367309	0.00309033	0.00191803	0.00477057	0.00115526	0.00220917
	3867.46	0.00238	0.00823	0.00272	0.004	0.00382	0.00431	0.00358633	0.00266132	0.0016438	0.00475803	0.00132973	0.00198954
	3867.22	0.00238	0.00825	0.00273	0.00401	0.00383	0.00432	0.00352474	0.00237283	0.00149843	0.00476186	0.00149597	0.00184153
	3866.98	0.00238	0.00827	0.00273	0.00402	0.00384	0.00432	0.00347317	0.00221385	0.00147078	0.00477254	0.00163841	0.00175777
	3866.74	0.00238	0.00829	0.00274	0.00403	0.00384	0.00432	0.00341319	0.0021824	0.0015499	0.00477691	0.00174907	0.00173579
	3866.5	0.00238	0.00831	0.00275	0.00404	0.00385	0.00432	0.00333107	0.00228775	0.00173007	0.00476277	0.00182464	0.00177843
	3866.26	0.00239	0.00833	0.00276	0.00404	0.00386	0.00432	0.00322572	0.0025522	0.00201302	0.00471804	0.00186564	0.00190029
	3866.02	0.00239	0.00836	0.00276	0.00405	0.00387	0.00432	0.00311166	0.00300323	0.00240663	0.00463208	0.00187315	0.00212209
	3865.77	0.00239	0.00838	0.00277	0.00406	0.00388	0.00432	0.00302268	0.00365939	0.00291365	0.00449553	0.00185128	0.0024624
	3865.53	0.00239	0.00841	0.00278	0.00406	0.00389	0.00433	0.00300839	0.00450163	0.0035128	0.00430546	0.00180915	0.00291647
	3865.29	0.0024	0.00843	0.00279	0.00407	0.0039	0.00433	0.00311916	0.005439	0.00413303	0.00407097	0.001765	0.00343268
	3865.05	0.0024	0.00846	0.0028	0.00408	0.0039	0.00433	0.00337107	0.0062988	0.00465238	0.00382212	0.00174152	0.00390199
	3864.81	0.0024	0.00849	0.0028	0.00408	0.00391	0.00433	0.00371513	0.00688014	0.00493705	0.00360672	0.00175777	0.00419297
	3864.57	0.00241	0.00851	0.00281	0.00409	0.00392	0.00433	0.00405475	0.00705854	0.00492032	0.00346017	0.00181704	0.00422315
	3864.33	0.00241	0.00854	0.00282	0.00409	0.00393	0.00433	0.00430476	0.00684813	0.00463519	0.00338627	0.00190274	0.00400343
	3864.09	0.00242	0.00857	0.00283	0.0041	0.00393	0.00434	0.00443546	0.00636532	0.00418731	0.0033595	0.00199309	0.00361823
	3863.85	0.00242	0.0086	0.00284	0.0041	0.00394	0.00434	0.00446025	0.00575219	0.00369186	0.00334844	0.00207149	0.00316806
	3863.6	0.00243	0.00862	0.00285	0.00411	0.00395	0.00434	0.00440737	0.00512497	0.00324088	0.00332653	0.00213151	0.00273599
	3863.36	0.00243	0.00865	0.00286	0.00411	0.00396	0.00434	0.00430027	0.00456511	0.002896	0.00327971	0.0021734	0.00237959
	3863.12	0.00244	0.00868	0.00287	0.00412	0.00396	0.00435	0.00415738	0.00412707	0.0026994	0.00320534	0.00220012	0.00213822
	3862.88	0.00244	0.00871	0.00288	0.00412	0.00397	0.00435	0.00399295	0.00384575	0.0026765	0.00311321	0.0022105	0.00204033
	3862.64	0.00245	0.00874	0.00289	0.00412	0.00398	0.00435	0.003823	0.0037352	0.00283807	0.00302445	0.00219886	0.00210594
	3862.4	0.00245	0.00877	0.0029	0.00413	0.00398	0.00435	0.00367381	0.00377751	0.00316686	0.00297365	0.00215453	0.00233941
	3862.16	0.00246	0.0088	0.00291	0.00413	0.00399	0.00436	0.00357735	0.00390991	0.00360592	0.00299861	0.00206382	0.00271742
	3861.92	0.00247	0.00883	0.00292	0.00413	0.004	0.00436	0.00356304	0.00402781	0.00405653	0.00312322	0.00192623	0.00317732
	3861.68	0.00247	0.00886	0.00293	0.00414	0.004	0.00436	0.00363753	0.0040209	0.00440269	0.00333642	0.00176125	0.00362592
	3861.44	0.00248	0.00889	0.00294	0.00414	0.00401	0.00436	0.00377551	0.0038239	0.00456059	0.0035924	0.00160733	0.00397439
	3861.19	0.00248	0.00892	0.00295	0.00414	0.00401	0.00437	0.00393014	0.00345395	0.00451326	0.00383329	0.00150631	0.00417271
	3860.95	0.00249	0.00895	0.00296	0.00414	0.00402	0.00437	0.00405904	0.00298874	0.00430559	0.00401974	0.00148212	0.00422133
	3860.71	0.0025	0.00897	0.00297	0.00414	0.00402	0.00437	0.00414134	0.00252363	0.00400985	0.00414491	0.00153347	0.00415341
	3860.47	0.0025	0.009	0.00298	0.00415	0.00403	0.00438	0.00417594	0.00213494	0.00369415	0.00422359	0.00163617	0.00401227
	3860.23	0.00251	0.00903	0.00299	0.00415	0.00403	0.00438	0.00417641	0.00186337	0.00340838	0.00428275	0.00175138	0.00383617
	3859.99	0.00251	0.00906	0.003	0.00415	0.00403	0.00438	0.00416206	0.0017136	0.00317924	0.00434889	0.00183698	0.00365129
	3859.75	0.00252	0.00909	0.00301	0.00415	0.00404	0.00439	0.00415038	0.00166276	0.00301609	0.00444123	0.00185761	0.00347396
	3859.51	0.00252	0.00911	0.00302	0.00415	0.00404	0.00439	0.00415327	0.001676	0.00291561	0.00456676	0.00179678	0.00331429
	3859.27	0.00253	0.00914	0.00303	0.00415	0.00404	0.00439	0.00417579	0.0017228	0.00287148	0.0047179	0.00166153	0.00318053
	3859.02	0.00254	0.00916	0.00304	0.00414	0.00405	0.0044	0.00421619	0.00179028	0.00287887	0.00487603	0.00148058	0.00308308
	3858.78	0.00254	0.00919	0.00304	0.00414	0.00405	0.0044	0.00426866	0.00188903	0.00293866	0.00501699	0.00129554	0.00303394
	3858.54	0.00255	0.00921	0.00305	0.00414	0.00405	0.0044	0.00433103	0.0020495	0.00305645	0.00511852	0.00114251	0.00304653
	3858.3	0.00255	0.00924	0.00306	0.00414	0.00405	0.00441	0.00440363	0.00230408	0.00323882	0.0051632	0.00104375	0.00313
	3858.06	0.00256	0.00926	0.00307	0.00414	0.00406	0.00441	0.00449194	0.00267164	0.00348376	0.00514459	0.00099833	0.00328477
	3857.82	0.00256	0.00928	0.00308	0.00413	0.00406	0.00441	0.0045993	0.0031381	0.00377414	0.00506726	0.00098739	0.00349185
	3857.58	0.00256	0.00931	0.00308	0.00413	0.00406	0.00442	0.0047239	0.00364839	0.00406991	0.00495295	0.0009811	0.00371295
	3857.34	0.00257	0.00933	0.00309	0.00412	0.00406	0.00442	0.00485273	0.00411319	0.00431934	0.00483813	0.00095512	0.00389352
	3857.1	0.00257	0.00935	0.0031	0.00412	0.00406	0.00442	0.00496341	0.00444068	0.00447493	0.00476586	0.00090702	0.00398131
	3856.85	0.00257	0.00937	0.0031	0.00412	0.00406	0.00443	0.00503548	0.00457767	0.00451853	0.00476574	0.00085682	0.00394954
	3856.61	0.00258	0.00938	0.00311	0.00411	0.00406	0.00443	0.00506053	0.00453231	0.00447149	0.00484405	0.0008339	0.00380775
	3856.37	0.00258	0.0094	0.00311	0.0041	0.00405	0.00443	0.00504431	0.00436284	0.00438516	0.00497961	0.00085937	0.00359728
	3856.13	0.00258	0.00942	0.00312	0.0041	0.00405	0.00443	0.00499937	0.00414257	0.0043174	0.00514038	0.00093407	0.00336695
	3855.89	0.00258	0.00943	0.00312	0.00409	0.00405	0.00444	0.00493299	0.00393757	0.00431836	0.00529067	0.0010406	0.00315986
	3855.65	0.00259	0.00945	0.00313	0.00409	0.00405	0.00444	0.00484117	0.00379699	0.00442796	0.005396	0.00115008	0.00300876
	3855.41	0.00259	0.00946	0.00313	0.00408	0.00404	0.00444	0.00470329	0.00376699	0.00468427	0.00541771	0.00123152	0.00294293
	3855.17	0.00259	0.00947	0.00313	0.00407	0.00404	0.00444	0.00447598	0.00390765	0.00513136	0.00530683	0.00125806	0.00299783
	3854.93	0.00259	0.00949	0.00313	0.00406	0.00404	0.00445	0.00408818	0.0043144	0.00582436	0.00499518	0.0012173	0.00322647
	3854.69	0.00259	0.0095	0.00314	0.00405	0.00403	0.00445	0.00344854	0.00512359	0.00680705	0.0044016	0.00113417	0.00369785
	3854.44	0.00259	0.0095	0.00314	0.00404	0.00403	0.00445	0.00250704	0.00644482	0.00802767	0.00348935	0.00110965	0.00445042
	3854.2	0.00259	0.00951	0.00314	0.00404	0.00402	0.00445	0.00141111	0.00815954	0.00920586	0.00241383	0.00132225	0.00537953
	3853.96	0.00259	0.00952	0.00314	0.00403	0.00402	0.00445	0.000604097	0.00976356	0.00988289	0.00160345	0.00189371	0.00616553
	3853.72	0.00258	0.00953	0.00314	0.00402	0.00401	0.00446	0.000455977	0.0107307	0.00983315	0.00140275	0.00271064	0.00651651
	3853.48	0.00258	0.00953	0.00314	0.004	0.004	0.00446	0.0008528	0.0110117	0.00927587	0.00169035	0.00352534	0.00643826
	3853.24	0.00258	0.00953	0.00313	0.00399	0.004	0.00446	0.00143906	0.0109136	0.00855576	0.00213231	0.00418186	0.00613184
	3853	0.00258	0.00954	0.00313	0.00398	0.00399	0.00446	0.00197174	0.0107247	0.00788255	0.00250608	0.0046432	0.0057773
	3852.76	0.00257	0.00954	0.00313	0.00397	0.00398	0.00446	0.00235948	0.0105776	0.0073307	0.00273951	0.00491348	0.00548225
	3852.52	0.00257	0.00954	0.00313	0.00396	0.00397	0.00446	0.00259709	0.0104641	0.00691695	0.0028392	0.00499193	0.00529977
	3852.27	0.00257	0.00954	0.00312	0.00395	0.00396	0.00446	0.00272622	0.0102701	0.00663094	0.00285775	0.00487997	0.00524431
	3852.03	0.00256	0.00954	0.00312	0.00393	0.00395	0.00446	0.00280981	0.00984455	0.00644452	0.00286153	0.00460242	0.00528496
	3851.79	0.00256	0.00953	0.00311	0.00392	0.00394	0.00446	0.00290152	0.00909548	0.00631445	0.00290097	0.00422397	0.00535671
	3851.55	0.00255	0.00953	0.00311	0.00391	0.00393	0.00446	0.00302302	0.0080632	0.00619164	0.002988	0.00383199	0.00538835
	3851.31	0.00255	0.00952	0.0031	0.00389	0.00392	0.00446	0.00316516	0.00688394	0.00604139	0.00310796	0.00349193	0.00533873
	3851.07	0.00254	0.00952	0.0031	0.00388	0.00391	0.00446	0.00331071	0.00570961	0.00584809	0.00324199	0.0032306	0.00520281
	3850.83	0.00253	0.00951	0.00309	0.00386	0.0039	0.00446	0.00344895	0.00465093	0.00561003	0.00338164	0.00304235	0.00499772
	3850.59	0.00253	0.0095	0.00308	0.00385	0.00389	0.00446	0.0035765	0.00377449	0.00533249	0.00352885	0.00290584	0.00474801
	3850.35	0.00252	0.00949	0.00307	0.00383	0.00388	0.00446	0.00369798	0.00311017	0.00502114	0.00369256	0.0027986	0.00447532
	3850.11	0.00251	0.00948	0.00306	0.00382	0.00387	0.00446	0.0038188	0.00265998	0.0046836	0.00388249	0.00270015	0.00419772
	3849.86	0.00251	0.00947	0.00305	0.0038	0.00385	0.00446	0.00394161	0.00239723	0.00432596	0.00410053	0.00259768	0.00392682
	3849.62	0.0025	0.00946	0.00305	0.00379	0.00384	0.00445	0.00406035	0.00226676	0.00395567	0.00433517	0.00248738	0.003668
	3849.38	0.00249	0.00944	0.00304	0.00377	0.00383	0.00445	0.00416224	0.00219491	0.00357952	0.00456204	0.00237415	0.00342026
	3849.14	0.00248	0.00943	0.00303	0.00376	0.00381	0.00445	0.00423458	0.0021139	0.00320429	0.00474945	0.00226871	0.00317784
	3848.9	0.00248	0.00941	0.00301	0.00374	0.0038	0.00445	0.00426999	0.00198523	0.00283762	0.00487216	0.00217898	0.00293535
	3848.66	0.00247	0.0094	0.003	0.00373	0.00378	0.00444	0.0042732	0.0018094	0.00249173	0.00491909	0.00210615	0.00269477
	3848.42	0.00246	0.00938	0.00299	0.00371	0.00377	0.00444	0.00425914	0.00161701	0.00218497	0.0048935	0.00204244	0.00246665
	3848.18	0.00245	0.00936	0.00298	0.00369	0.00375	0.00444	0.00424526	0.00144858	0.00193976	0.00480845	0.00197604	0.00226754
	3847.94	0.00244	0.00934	0.00297	0.00368	0.00374	0.00444	0.00424532	0.00133589	0.00178062	0.00468274	0.00189482	0.00211867
	3847.69	0.00243	0.00932	0.00295	0.00366	0.00372	0.00443	0.00426586	0.00129083	0.00172463	0.00453639	0.00179438	0.00203731
	3847.45	0.00242	0.0093	0.00294	0.00364	0.00371	0.00443	0.00430308	0.0013039	0.00177523	0.00438962	0.00168133	0.00203206
	3847.21	0.00241	0.00928	0.00293	0.00363	0.00369	0.00442	0.00434503	0.00135253	0.0019163	0.00426031	0.00157369	0.00209526
	3846.97	0.00241	0.00926	0.00292	0.00361	0.00368	0.00442	0.00437709	0.00141212	0.00211442	0.00416387	0.00149574	0.00220706
	3846.73	0.0024	0.00924	0.0029	0.0036	0.00366	0.00442	0.00438967	0.00146771	0.00232594	0.00411112	0.00147242	0.00233563
	3846.49	0.00239	0.00922	0.00289	0.00358	0.00364	0.00441	0.00438109	0.00151852	0.00250962	0.00410719	0.00152166	0.00244792
	3846.25	0.00238	0.0092	0.00287	0.00356	0.00363	0.00441	0.00435849	0.00157552	0.00263508	0.00415009	0.0016496	0.00251377
	3846.01	0.00237	0.00917	0.00286	0.00355	0.00361	0.0044	0.00433358	0.00165506	0.00269133	0.00423082	0.00184925	0.00251546
	3845.77	0.00236	0.00915	0.00285	0.00353	0.0036	0.0044	0.00431465	0.00177456	0.00268978	0.00433168	0.00210296	0.00245353
	3845.52	0.00235	0.00913	0.00283	0.00352	0.00358	0.00439	0.00430334	0.00194943	0.00266118	0.0044314	0.00238738	0.00234899
	3845.28	0.00234	0.0091	0.00282	0.0035	0.00356	0.00439	0.00429203	0.00219514	0.00264953	0.00450743	0.00267951	0.00223933
	3845.04	0.00233	0.00908	0.0028	0.00349	0.00355	0.00438	0.00426556	0.00253068	0.00270402	0.0045398	0.00295666	0.00217877
	3844.8	0.00232	0.00905	0.00279	0.00347	0.00353	0.00438	0.00420734	0.00297549	0.0028724	0.00451487	0.00319394	0.00222657
	3844.56	0.00232	0.00903	0.00277	0.00346	0.00351	0.00437	0.00410578	0.00353793	0.00318832	0.00442898	0.00336046	0.00244002
	3844.32	0.00231	0.009	0.00276	0.00344	0.0035	0.00437	0.003961	0.00419477	0.00365762	0.00429234	0.00341629	0.00285284
	3844.08	0.0023	0.00898	0.00274	0.00343	0.00348	0.00436	0.00379131	0.0048619	0.00423385	0.00413449	0.00332172	0.00344617
	3843.84	0.00229	0.00895	0.00273	0.00342	0.00346	0.00436	0.00363326	0.00539283	0.00480874	0.00400058	0.00306052	0.00412356
	3843.6	0.00228	0.00893	0.00272	0.0034	0.00345	0.00435	0.00352702	0.00562699	0.00523783	0.00393466	0.002668	0.00472565
	3843.36	0.00228	0.0089	0.0027	0.00339	0.00343	0.00435	0.00348754	0.00547649	0.00541	0.00395078	0.00222705	0.00510161
	3843.11	0.00227	0.00888	0.00269	0.00338	0.00342	0.00434	0.0034999	0.00497816	0.00530039	0.00402737	0.00183046	0.00518353
	3842.87	0.00226	0.00885	0.00268	0.00336	0.0034	0.00434	0.00353338	0.0042584	0.00496616	0.00412451	0.00153946	0.00500118
	3842.63	0.00226	0.00883	0.00266	0.00335	0.00339	0.00433	0.00356146	0.00346717	0.0045008	0.00420669	0.00136936	0.0046409
	3842.39	0.00225	0.0088	0.00265	0.00334	0.00337	0.00433	0.00357175	0.00273327	0.00399324	0.00425136	0.00130416	0.0041939
	3842.15	0.00224	0.00878	0.00264	0.00333	0.00336	0.00432	0.00356656	0.00215677	0.0035156	0.0042475	0.00130925	0.00373793
	3841.91	0.00224	0.00875	0.00262	0.00332	0.00334	0.00431	0.00355945	0.00181782	0.00312332	0.00419179	0.00134463	0.00332804
	3841.67	0.00223	0.00873	0.00261	0.00331	0.00333	0.00431	0.00357115	0.00178233	0.00285836	0.00408681	0.00136898	0.00300254
	3841.43	0.00223	0.0087	0.0026	0.0033	0.00331	0.0043	0.00363009	0.00209444	0.00275251	0.00394407	0.00134806	0.00278174
	3841.19	0.00222	0.00868	0.00259	0.00329	0.0033	0.0043	0.00376256	0.00275282	0.00281574	0.00378657	0.00126144	0.0026684
	3840.94	0.00222	0.00865	0.00258	0.00329	0.00328	0.00429	0.00397987	0.00368062	0.00303081	0.00364694	0.00111628	0.00264769
	3840.7	0.00222	0.00863	0.00257	0.00328	0.00327	0.00429	0.00426344	0.00471408	0.00334724	0.00356217	0.00094736	0.00268945
	3840.46	0.00221	0.00861	0.00256	0.00327	0.00326	0.00428	0.00456072	0.00564164	0.00369767	0.00355571	0.00081011	0.00275736
	3840.22	0.00221	0.00858	0.00255	0.00326	0.00324	0.00428	0.00480411	0.0062852	0.00402128	0.00362378	0.00075225	0.00282235
	3839.98	0.00221	0.00856	0.00254	0.00326	0.00323	0.00427	0.00494371	0.00656627	0.00428869	0.00373897	0.00079705	0.00286834
	3839.74	0.0022	0.00854	0.00253	0.00325	0.00322	0.00426	0.00495947	0.00651674	0.00449935	0.0038654	0.00094374	0.00288794
	3839.5	0.0022	0.00852	0.00252	0.00325	0.00321	0.00426	0.00485827	0.00623679	0.00467133	0.00397507	0.00118191	0.00287766
	3839.26	0.0022	0.00849	0.00251	0.00324	0.00319	0.00425	0.00465681	0.00585128	0.0048239	0.0040509	0.00150404	0.00283463
	3839.02	0.0022	0.00847	0.0025	0.00324	0.00318	0.00425	0.00437328	0.00548291	0.00497153	0.00408406	0.00191422	0.00275759
	3838.77	0.0022	0.00845	0.0025	0.00323	0.00317	0.00424	0.0040264	0.00524854	0.00511597	0.00407221	0.0024233	0.00265387
	3838.53	0.0022	0.00843	0.00249	0.00323	0.00316	0.00424	0.00364817	0.00524961	0.0052436	0.00401839	0.00303156	0.00254535
	3838.29	0.0022	0.00841	0.00248	0.00323	0.00315	0.00423	0.00330127	0.00554627	0.00532103	0.00394116	0.00369568	0.00247981
	3838.05	0.0022	0.00839	0.00248	0.00323	0.00314	0.00423	0.0030886	0.00608367	0.00530026	0.00387905	0.00429158	0.00252446
	3837.81	0.0022	0.00838	0.00247	0.00323	0.00313	0.00422	0.00310395	0.0066413	0.00515228	0.00388179	0.00464234	0.00272356
	3837.57	0.0022	0.00836	0.00247	0.00323	0.00312	0.00422	0.00333446	0.00693074	0.00490451	0.00396853	0.00463964	0.00304176
	3837.33	0.00221	0.00834	0.00246	0.00323	0.00311	0.00421	0.00365379	0.00681846	0.00463191	0.00410562	0.00434826	0.00337868
	3837.09	0.00221	0.00832	0.00246	0.00323	0.0031	0.00421	0.00393397	0.00639274	0.0044036	0.00423697	0.00393896	0.00364671
	3836.85	0.00221	0.00831	0.00246	0.00323	0.00309	0.00421	0.00412419	0.00583411	0.00425062	0.00432612	0.00355824	0.00381236
	3836.61	0.00221	0.00829	0.00245	0.00323	0.00309	0.0042	0.00422831	0.00529599	0.0041786	0.0043576	0.00328149	0.00388667
	3836.36	0.00222	0.00827	0.00245	0.00323	0.00308	0.0042	0.00427238	0.00487483	0.00418488	0.00432882	0.00313074	0.00389882
	3836.12	0.00222	0.00826	0.00245	0.00323	0.00307	0.00419	0.00428319	0.00462528	0.004269	0.00424036	0.00310045	0.0038831
	3835.88	0.00223	0.00824	0.00245	0.00324	0.00307	0.00419	0.0042859	0.00457016	0.00443056	0.00410037	0.00316719	0.00387716
	3835.64	0.00223	0.00823	0.00245	0.00324	0.00306	0.00418	0.00429877	0.00469739	0.00465989	0.00392889	0.00328729	0.00391619
	3835.4	0.00224	0.00822	0.00245	0.00324	0.00305	0.00418	0.00433274	0.00494387	0.00492472	0.0037656	0.00339341	0.00402855
	3835.16	0.00224	0.0082	0.00245	0.00325	0.00305	0.00418	0.00438398	0.00518707	0.00516167	0.00366427	0.00339979	0.00421267
	3834.92	0.00225	0.00819	0.00245	0.00325	0.00304	0.00417	0.00443315	0.00527545	0.00528794	0.00367252	0.00323966	0.00442883
	3834.68	0.00225	0.00818	0.00245	0.00326	0.00304	0.00417	0.00445677	0.00510086	0.00524147	0.0037957	0.00290427	0.00460334
	3834.44	0.00226	0.00816	0.00245	0.00326	0.00303	0.00416	0.00444153	0.00466026	0.00501517	0.00398772	0.00245469	0.00466939
	3834.19	0.00226	0.00815	0.00245	0.00327	0.00303	0.00416	0.00439445	0.00404077	0.0046567	0.00418482	0.00198341	0.00459677
	3833.95	0.00227	0.00814	0.00245	0.00328	0.00302	0.00416	0.00433127	0.00336111	0.00423599	0.00433832	0.00157101	0.00439741
	3833.71	0.00228	0.00813	0.00246	0.00328	0.00302	0.00415	0.0042695	0.0027205	0.00381639	0.00442823	0.00126386	0.00410613
	3833.47	0.00228	0.00812	0.00246	0.00329	0.00302	0.00415	0.00422295	0.00218549	0.00344147	0.00445779	0.0010782	0.00376375
	3833.23	0.00229	0.00811	0.00246	0.0033	0.00301	0.00415	0.00419946	0.00179774	0.00314097	0.0044399	0.00101044	0.00340941
	3832.99	0.0023	0.0081	0.00247	0.0033	0.00301	0.00414	0.00420614	0.00158617	0.00293248	0.00439637	0.00104567	0.00307826
	3832.75	0.00231	0.00809	0.00247	0.00331	0.00301	0.00414	0.00424785	0.00157195	0.00282579	0.00435118	0.00115979	0.00280165
	3832.51	0.00231	0.00808	0.00248	0.00332	0.003	0.00414	0.00432798	0.00176759	0.00282316	0.00432953	0.00131982	0.00260802
	3832.27	0.00232	0.00807	0.00248	0.00333	0.003	0.00413	0.00444736	0.00215889	0.0029142	0.00435478	0.00148389	0.00251725
	3832.02	0.00233	0.00806	0.00249	0.00333	0.003	0.00413	0.00459698	0.00268252	0.00306828	0.004439	0.00160641	0.00253071
	3831.78	0.00234	0.00806	0.00249	0.00334	0.003	0.00412	0.00475174	0.00321346	0.00323266	0.0045723	0.00165386	0.00261774
	3831.54	0.00234	0.00805	0.0025	0.00335	0.003	0.00412	0.00487624	0.00359528	0.00334739	0.004717	0.00162358	0.00272051
	3831.3	0.00235	0.00804	0.0025	0.00336	0.00299	0.00412	0.00494081	0.00371864	0.00337306	0.00482783	0.00155084	0.00277699
	3831.06	0.00236	0.00803	0.00251	0.00337	0.00299	0.00411	0.00493819	0.00357506	0.00330684	0.00487915	0.00148683	0.00275451
	3830.82	0.00237	0.00802	0.00252	0.00338	0.00299	0.00411	0.00488028	0.00324055	0.0031753	0.00487541	0.00146949	0.00265871
	3830.58	0.00238	0.00802	0.00252	0.00339	0.00299	0.00411	0.00478801	0.00282068	0.00301061	0.0048385	0.00151216	0.00251883
	3830.34	0.00238	0.00801	0.00253	0.0034	0.00299	0.0041	0.00467957	0.00240478	0.00283786	0.00479103	0.00160693	0.00236789
	3830.1	0.00239	0.008	0.00254	0.0034	0.00299	0.0041	0.00456892	0.00205409	0.00267082	0.00475051	0.00173819	0.00223454
	3829.86	0.0024	0.00799	0.00254	0.00341	0.00299	0.0041	0.00446647	0.00180043	0.00251634	0.00472568	0.00188583	0.00213561
	3829.61	0.00241	0.00799	0.00255	0.00342	0.00299	0.00409	0.00437965	0.00165628	0.00237993	0.00471743	0.00203161	0.0020788
	3829.37	0.00242	0.00798	0.00256	0.00343	0.00299	0.00409	0.00431184	0.00161547	0.00226859	0.00471959	0.00216061	0.00206292
	3829.13	0.00242	0.00797	0.00257	0.00344	0.00299	0.00408	0.00426377	0.00166099	0.00219532	0.00472265	0.002262	0.00208061
	3828.89	0.00243	0.00797	0.00257	0.00345	0.00299	0.00408	0.0042295	0.00176811	0.00217552	0.00471644	0.00232938	0.00212095
	3828.65	0.00244	0.00796	0.00258	0.00346	0.00299	0.00408	0.00419944	0.00191406	0.00222429	0.00469274	0.00236117	0.00217393
	3828.41	0.00245	0.00795	0.00259	0.00347	0.00299	0.00407	0.00416385	0.00208169	0.00235284	0.00464969	0.0023588	0.00223336
	3828.17	0.00246	0.00795	0.00259	0.00347	0.00299	0.00407	0.00411499	0.00226298	0.0025601	0.00458999	0.00232689	0.0022956
	3827.93	0.00246	0.00794	0.0026	0.00348	0.00299	0.00406	0.00405021	0.00245691	0.00283098	0.00451856	0.00227267	0.00235791
	3827.69	0.00247	0.00793	0.00261	0.00349	0.00299	0.00406	0.00397447	0.00266451	0.00313419	0.00444194	0.00220629	0.00241592
	3827.44	0.00248	0.00793	0.00262	0.0035	0.00299	0.00405	0.00390006	0.00288172	0.00342217	0.00436247	0.00214126	0.0024593
	3827.2	0.00248	0.00792	0.00262	0.00351	0.00299	0.00405	0.00384183	0.00309465	0.0036404	0.00427843	0.00208908	0.00247465
	3826.96	0.00249	0.00791	0.00263	0.00351	0.00299	0.00404	0.00381051	0.00327747	0.0037409	0.00418447	0.00206056	0.00244519
	3826.72	0.0025	0.0079	0.00264	0.00352	0.00299	0.00404	0.00380821	0.00339778	0.00370165	0.00407894	0.00205822	0.00236376
	3826.48	0.0025	0.0079	0.00264	0.00353	0.00299	0.00403	0.00382093	0.00342934	0.00354043	0.00396221	0.00207625	0.00223831
	3826.24	0.00251	0.00789	0.00265	0.00354	0.00299	0.00403	0.00382968	0.00336451	0.00330681	0.00384409	0.0021061	0.00209272
	3826	0.00252	0.00788	0.00266	0.00354	0.00299	0.00402	0.00381938	0.0032155	0.00306033	0.00373743	0.00214224	0.00195931
	3825.76	0.00252	0.00788	0.00266	0.00355	0.003	0.00402	0.00378683	0.00300888	0.00284599	0.00365254	0.00218509	0.00186823
	3825.52	0.00253	0.00787	0.00267	0.00356	0.003	0.00401	0.00374085	0.00277457	0.00268746	0.00359474	0.00224135	0.00184198
	3825.27	0.00254	0.00786	0.00267	0.00356	0.003	0.00401	0.00369965	0.00254042	0.00258819	0.00356545	0.00231865	0.00189253
	3825.03	0.00254	0.00785	0.00268	0.00357	0.003	0.004	0.00368336	0.00232849	0.00254142	0.00356369	0.00242286	0.00202061
	3824.79	0.00255	0.00785	0.00268	0.00357	0.003	0.00399	0.00371165	0.00215784	0.00253759	0.003589	0.00254887	0.00221716
	3824.55	0.00255	0.00784	0.00269	0.00358	0.003	0.00399	0.00379936	0.00204428	0.00256975	0.00364183	0.00268277	0.00246204
	3824.31	0.00256	0.00783	0.0027	0.00358	0.003	0.00398	0.00395201	0.00199796	0.00263472	0.00372534	0.00279956	0.00272694
	3824.07	0.00256	0.00782	0.0027	0.00359	0.003	0.00397	0.00416295	0.00202433	0.00273085	0.00384141	0.00287105	0.00297799
	3823.83	0.00257	0.00781	0.0027	0.00359	0.00301	0.00397	0.00441537	0.00212345	0.00285819	0.00398846	0.00287251	0.00318666
	3823.59	0.00257	0.00781	0.00271	0.00359	0.00301	0.00396	0.0046853	0.002293	0.00301735	0.00415913	0.00279096	0.00333823
	3823.35	0.00258	0.0078	0.00271	0.0036	0.00301	0.00395	0.00494578	0.00253501	0.00321179	0.00433748	0.00262357	0.00343749
	3823.11	0.00258	0.00779	0.00272	0.0036	0.00301	0.00395	0.00516842	0.00285958	0.00345166	0.00450019	0.00238281	0.00350856
	3822.86	0.00259	0.00778	0.00272	0.0036	0.00301	0.00394	0.00532434	0.00329281	0.00375991	0.00461777	0.00208625	0.00359682
	3822.62	0.00259	0.00777	0.00272	0.00361	0.00301	0.00393	0.00537755	0.00387568	0.00417256	0.00465326	0.00176041	0.00376401
	3822.38	0.00259	0.00777	0.00273	0.00361	0.00301	0.00393	0.00528417	0.0046633	0.00473916	0.00456643	0.001446	0.00409092
	3822.14	0.0026	0.00776	0.00273	0.00361	0.00302	0.00392	0.00499389	0.00570898	0.00551008	0.00431942	0.00120438	0.00466641
	3821.9	0.0026	0.00775	0.00273	0.00361	0.00302	0.00391	0.00446744	0.00702955	0.00650769	0.00389662	0.00112091	0.00556896
	3821.66	0.00261	0.00774	0.00273	0.00362	0.00302	0.0039	0.00371983	0.00853811	0.00767055	0.00333725	0.00129137	0.00680974
	3821.42	0.00261	0.00773	0.00274	0.00362	0.00302	0.0039	0.00289285	0.00997933	0.00879664	0.00278674	0.00176538	0.00825409
	3821.18	0.00261	0.00773	0.00274	0.00362	0.00302	0.00389	0.00226337	0.0109573	0.00956641	0.00247161	0.0024626	0.0095845
	3820.94	0.00262	0.00772	0.00274	0.00362	0.00303	0.00388	0.00208499	0.0111523	0.00971863	0.00255	0.0031558	0.0104314
	3820.69	0.00262	0.00771	0.00274	0.00362	0.00303	0.00387	0.00236226	0.0105553	0.00923939	0.0029545	0.0035929	0.0106032
	3820.45	0.00262	0.0077	0.00274	0.00362	0.00303	0.00386	0.00286601	0.00945038	0.00835174	0.00346425	0.00365846	0.0101798
	3820.21	0.00263	0.00769	0.00274	0.00362	0.00303	0.00386	0.00335618	0.0081855	0.0073316	0.0038947	0.00339606	0.0093843
	3819.97	0.00263	0.00768	0.00274	0.00362	0.00303	0.00385	0.00370674	0.00700446	0.00637107	0.00417017	0.00292923	0.00843094
	3819.73	0.00263	0.00768	0.00274	0.00362	0.00304	0.00384	0.00389106	0.00601743	0.00555388	0.00429162	0.0023862	0.00745748
	3819.49	0.00263	0.00767	0.00274	0.00362	0.00304	0.00383	0.00393495	0.00524339	0.00489115	0.00429215	0.00187145	0.00653666
	3819.25	0.00264	0.00766	0.00274	0.00362	0.00304	0.00382	0.00388064	0.0046518	0.00436048	0.00421273	0.00145781	0.00570094
	3819.01	0.00264	0.00765	0.00274	0.00362	0.00304	0.00381	0.00377069	0.00419415	0.00392838	0.00409035	0.00118904	0.00496441
	3818.77	0.00264	0.00765	0.00274	0.00361	0.00305	0.0038	0.00364128	0.00382176	0.00356847	0.0039572	0.00108057	0.00433469
	3818.53	0.00265	0.00764	0.00274	0.00361	0.00305	0.0038	0.00351429	0.00349684	0.00326522	0.00383895	0.00112086	0.00381441
	3818.28	0.00265	0.00763	0.00274	0.00361	0.00305	0.00379	0.00339826	0.00320055	0.00301638	0.00375271	0.00127603	0.00339891
	3818.04	0.00265	0.00763	0.00274	0.00361	0.00306	0.00378	0.00328563	0.00293778	0.00282624	0.00370666	0.00149995	0.00307446
	3817.8	0.00265	0.00762	0.00274	0.00361	0.00306	0.00377	0.00315939	0.00273402	0.00270341	0.00369972	0.0017488	0.00282042
	3817.56	0.00266	0.00761	0.00274	0.0036	0.00306	0.00376	0.00299576	0.00263255	0.00265463	0.00372557	0.00198773	0.00261379
	3817.32	0.00266	0.00761	0.00273	0.0036	0.00306	0.00375	0.00276685	0.00268796	0.00268746	0.00377185	0.00219513	0.00243708
	3817.08	0.00266	0.0076	0.00273	0.0036	0.00307	0.00374	0.00244583	0.00296644	0.00281017	0.00382226	0.00235502	0.00228812
	3816.84	0.00266	0.00759	0.00273	0.0036	0.00307	0.00374	0.0020177	0.003533	0.00303702	0.00385471	0.00244546	0.00218979
	3816.6	0.00267	0.00759	0.00273	0.00359	0.00307	0.00373	0.0015037	0.00441297	0.00337908	0.00384214	0.00243222	0.00219457
	3816.36	0.00267	0.00758	0.00273	0.00359	0.00308	0.00372	0.00100558	0.00551537	0.00382571	0.00376007	0.00227284	0.00237002
	3816.11	0.00267	0.00758	0.00272	0.00359	0.00308	0.00371	0.00071644	0.00656579	0.0043073	0.00361267	0.00195353	0.00274198
	3815.87	0.00268	0.00757	0.00272	0.00358	0.00308	0.0037	0.000801854	0.00719914	0.00470415	0.00345278	0.00153931	0.00322946
	3815.63	0.00268	0.00757	0.00272	0.00358	0.00309	0.00369	0.00123298	0.00722588	0.0049139	0.00334867	0.00115445	0.0036733
	3815.39	0.00268	0.00756	0.00271	0.00357	0.00309	0.00368	0.00182317	0.00675083	0.00491643	0.00333178	0.0008959	0.00395041
	3815.15	0.00268	0.00756	0.00271	0.00357	0.0031	0.00368	0.00240367	0.00600947	0.00475405	0.00339011	0.000787	0.00403544
	3814.91	0.00269	0.00755	0.00271	0.00357	0.0031	0.00367	0.00289379	0.00519866	0.00448083	0.00349899	0.00080153	0.0039671
	3814.67	0.00269	0.00755	0.0027	0.00356	0.0031	0.00366	0.00327586	0.0044283	0.00414	0.00363823	0.00089841	0.00380217
	3814.43	0.00269	0.00755	0.0027	0.00356	0.00311	0.00365	0.00355685	0.00375036	0.00376296	0.00379496	0.00103604	0.00359251
	3814.19	0.00269	0.00754	0.00269	0.00355	0.00311	0.00364	0.00374779	0.00318977	0.00337833	0.00395708	0.00117767	0.00338102
	3813.94	0.0027	0.00754	0.00269	0.00355	0.00311	0.00363	0.00386239	0.00275812	0.00301444	0.00411171	0.00129375	0.00320009
	3813.7	0.0027	0.00754	0.00268	0.00354	0.00312	0.00363	0.00391657	0.00245958	0.00269766	0.00424452	0.00136656	0.00306998
	3813.46	0.0027	0.00753	0.00268	0.00354	0.00312	0.00362	0.00392956	0.00228493	0.00244739	0.00434146	0.00139217	0.00299676
	3813.22	0.00271	0.00753	0.00267	0.00353	0.00312	0.00361	0.0039244	0.00221093	0.00226917	0.00439278	0.00138371	0.00297076
	3812.98	0.00271	0.00753	0.00267	0.00353	0.00313	0.0036	0.00392466	0.00220109	0.00215533	0.00439833	0.00136498	0.00297227
	3812.74	0.00271	0.00753	0.00266	0.00352	0.00313	0.00359	0.00395105	0.00221348	0.00208839	0.00437087	0.0013612	0.00297643
	3812.5	0.00271	0.00752	0.00266	0.00352	0.00313	0.00359	0.00401598	0.0022122	0.00204896	0.00433367	0.00139065	0.0029609
	3812.26	0.00272	0.00752	0.00265	0.00351	0.00314	0.00358	0.00412191	0.00217333	0.00202431	0.00431417	0.00145617	0.00291135
	3812.02	0.00272	0.00752	0.00265	0.00351	0.00314	0.00357	0.00426045	0.00208942	0.00201125	0.00433645	0.0015489	0.00282319
	3811.78	0.00272	0.00752	0.00264	0.0035	0.00314	0.00357	0.00441322	0.0019647	0.00201382	0.0044128	0.00165056	0.00270062
	3811.53	0.00272	0.00752	0.00264	0.00349	0.00315	0.00356	0.00455325	0.00181059	0.00203841	0.00453565	0.00174579	0.00255233
	3811.29	0.00272	0.00752	0.00263	0.00349	0.00315	0.00355	0.00465012	0.00163611	0.00208639	0.00467995	0.00182465	0.0023904
	3811.05	0.00273	0.00752	0.00262	0.00348	0.00315	0.00354	0.00467631	0.00144548	0.00215093	0.00480759	0.00188806	0.00222721
	3810.81	0.00273	0.00751	0.00262	0.00347	0.00315	0.00354	0.00461464	0.00123784	0.00221539	0.00487898	0.00194653	0.00207081
	3810.57	0.00273	0.00751	0.00261	0.00347	0.00316	0.00353	0.004464	0.00101072	0.00225818	0.00486522	0.00201227	0.00192637
	3810.33	0.00273	0.00751	0.0026	0.00346	0.00316	0.00352	0.00424333	0.00076795	0.00225648	0.00475779	0.00209312	0.00179308
	3810.09	0.00273	0.00751	0.0026	0.00345	0.00316	0.00352	0.00398914	0.00052465	0.00219447	0.0045715	0.0021889	0.00166665
	3809.85	0.00273	0.00751	0.00259	0.00344	0.00316	0.00351	0.00374934	0.0003084	0.00206685	0.00434053	0.00228911	0.00153992
	3809.61	0.00274	0.00751	0.00258	0.00344	0.00316	0.00351	0.00357018	0.00015371	0.00188265	0.00410919	0.00237871	0.00140647
	3809.36	0.00274	0.00751	0.00258	0.00343	0.00316	0.0035	0.00348315	9.363e-05	0.00166456	0.0039186	0.00244234	0.00126468
	3809.12	0.00274	0.00751	0.00257	0.00342	0.00316	0.00349	0.00349657	0.0001522	0.00144482	0.0037946	0.00246905	0.00111973
	3808.88	0.00274	0.00751	0.00256	0.00341	0.00316	0.00349	0.00359442	0.00034127	0.00126138	0.00374341	0.0024556	0.00098557
	3808.64	0.00274	0.00751	0.00255	0.0034	0.00316	0.00348	0.00374455	0.0006625	0.00115317	0.00375394	0.0024045	0.00088323
	3808.4	0.00274	0.00751	0.00255	0.00339	0.00316	0.00348	0.00390773	0.00111554	0.00115903	0.00380453	0.00232151	0.00083971
	3808.16	0.00274	0.0075	0.00254	0.00338	0.00316	0.00347	0.00404883	0.00170053	0.00131924	0.00386897	0.00221	0.0008881
	3807.92	0.00274	0.0075	0.00253	0.00337	0.00316	0.00347	0.00414077	0.00241448	0.00167245	0.00392344	0.00207448	0.00106713
	3807.68	0.00274	0.0075	0.00252	0.00337	0.00316	0.00346	0.00417335	0.00323395	0.00224287	0.00395043	0.00191898	0.00141121
	3807.44	0.00274	0.0075	0.00251	0.00335	0.00316	0.00346	0.00415957	0.00408303	0.00300666	0.00394732	0.00175359	0.0019317
	3807.19	0.00274	0.0075	0.0025	0.00334	0.00315	0.00345	0.00414217	0.00480407	0.00385083	0.00393492	0.00159875	0.00258228
	3806.95	0.00274	0.0075	0.00249	0.00333	0.00315	0.00345	0.0041805	0.00519812	0.00457012	0.00395846	0.00148256	0.00323942
	3806.71	0.00274	0.00749	0.00248	0.00332	0.00315	0.00344	0.0043081	0.0051454	0.00497345	0.00405889	0.00142451	0.00375117
	3806.47	0.00273	0.00749	0.00247	0.00331	0.00314	0.00344	0.00450333	0.00469992	0.00500979	0.00424138	0.00141765	0.0040343
	3806.23	0.00273	0.00749	0.00246	0.0033	0.00314	0.00344	0.00471648	0.00403361	0.00477988	0.00447451	0.00143863	0.00410894
	3805.99	0.00273	0.00748	0.00245	0.00329	0.00314	0.00343	0.00491009	0.00331046	0.00442697	0.00472534	0.00146303	0.00404758
	3805.75	0.00273	0.00748	0.00244	0.00328	0.00313	0.00343	0.00506463	0.00263048	0.00406156	0.00496961	0.0014771	0.0039153
	3805.51	0.00272	0.00748	0.00243	0.00326	0.00312	0.00342	0.00517377	0.00203892	0.00374162	0.00519525	0.00147599	0.00375228
	3805.27	0.00272	0.00747	0.00242	0.00325	0.00312	0.00342	0.00523192	0.00155453	0.00349113	0.00539438	0.00146238	0.00357573
	3805.03	0.00272	0.00747	0.00241	0.00324	0.00311	0.00342	0.00523029	0.00119037	0.00331521	0.00556159	0.00144335	0.00339273
	3804.78	0.00271	0.00746	0.0024	0.00322	0.0031	0.00341	0.00515996	0.00096084	0.00321294	0.00569306	0.00143024	0.0032065
	3804.54	0.00271	0.00746	0.00239	0.00321	0.0031	0.00341	0.0050152	0.00088208	0.00318155	0.00578795	0.00143397	0.00302468
	3804.3	0.0027	0.00745	0.00238	0.0032	0.00309	0.00341	0.0047981	0.00096573	0.00321656	0.00584745	0.00146811	0.00285911
	3804.06	0.0027	0.00744	0.00236	0.00318	0.00308	0.0034	0.00452219	0.00121031	0.00331011	0.0058754	0.00154624	0.00272407
	3803.82	0.00269	0.00744	0.00235	0.00317	0.00307	0.0034	0.00421095	0.0015957	0.00344748	0.00587591	0.00168036	0.00263169
	3803.58	0.00269	0.00743	0.00234	0.00315	0.00306	0.0034	0.00389165	0.00208421	0.00360427	0.00584951	0.0018793	0.00258691
	3803.34	0.00268	0.00742	0.00233	0.00314	0.00305	0.0034	0.00358674	0.00262421	0.00375107	0.0057894	0.00214794	0.00258788
	3803.1	0.00267	0.00741	0.00232	0.00312	0.00304	0.0034	0.00330529	0.00316409	0.00385843	0.00568172	0.00248471	0.00262499
	3802.86	0.00267	0.0074	0.0023	0.0031	0.00303	0.00339	0.00303469	0.0036682	0.00390866	0.00550462	0.00288067	0.00268486
	3802.61	0.00266	0.00739	0.00229	0.00309	0.00302	0.00339	0.00274299	0.00413166	0.00390442	0.00523406	0.00331559	0.00275646
	3802.37	0.00265	0.00738	0.00228	0.00307	0.00301	0.00339	0.00239002	0.00459232	0.00388169	0.00484946	0.00375454	0.00284062
	3802.13	0.00265	0.00737	0.00226	0.00305	0.00299	0.00339	0.00195355	0.00512482	0.00390759	0.00434978	0.0041391	0.00295033
	3801.89	0.00264	0.00736	0.00225	0.00304	0.00298	0.00339	0.00146841	0.00580539	0.00406399	0.00377558	0.00438415	0.00311212
	3801.65	0.00263	0.00735	0.00223	0.00302	0.00297	0.00339	0.00106445	0.00663689	0.00439751	0.00323414	0.00438778	0.00334974
	3801.41	0.00262	0.00734	0.00222	0.003	0.00295	0.00338	0.000939001	0.00746839	0.00485234	0.00288854	0.00408327	0.00365502
	3801.17	0.00261	0.00732	0.00221	0.00298	0.00294	0.00338	0.00120859	0.00802127	0.00525287	0.00285579	0.0035113	0.00396757
	3800.93	0.0026	0.00731	0.00219	0.00296	0.00292	0.00338	0.00177974	0.0080731	0.00541217	0.00310352	0.00282042	0.00420084
	3800.69	0.00259	0.00729	0.00218	0.00294	0.00291	0.00338	0.0024329	0.00760843	0.00525838	0.00348455	0.00217262	0.00429855
	3800.44	0.00258	0.00728	0.00216	0.00292	0.00289	0.00338	0.00299595	0.00677696	0.00484728	0.00386283	0.00165738	0.00425075
	3800.2	0.00257	0.00726	0.00215	0.00291	0.00288	0.00338	0.00341023	0.00576167	0.00428303	0.00416983	0.00129505	0.00407844
	3799.96	0.00256	0.00725	0.00213	0.00289	0.00286	0.00338	0.00369139	0.004707	0.00366267	0.00438955	0.00107423	0.00380594
	3799.72	0.00255	0.00723	0.00212	0.00287	0.00284	0.00338	0.00388588	0.00371144	0.0030581	0.00453213	0.00097841	0.00345626
	3799.48	0.00254	0.00721	0.0021	0.00285	0.00283	0.00338	0.00403993	0.00284567	0.0025229	0.00461041	0.00099663	0.00305347
	3799.24	0.00253	0.00719	0.00209	0.00283	0.00281	0.00338	0.0041898	0.00216621	0.00209763	0.00463918	0.00111783	0.00262592
	3799	0.00251	0.00718	0.00207	0.00281	0.00279	0.00338	0.00435334	0.00171776	0.00181281	0.00463162	0.00132363	0.00221016
	3798.76	0.0025	0.00716	0.00206	0.00278	0.00277	0.00338	0.00452746	0.00152775	0.00168687	0.0045985	0.00158036	0.00184831
	3798.52	0.00249	0.00714	0.00204	0.00276	0.00275	0.00338	0.00468897	0.00159511	0.00172295	0.00454841	0.00183919	0.00157875
	3798.28	0.00248	0.00712	0.00202	0.00274	0.00273	0.00338	0.00480321	0.0018904	0.00190782	0.00448712	0.00204562	0.00142777
	3798.03	0.00246	0.0071	0.00201	0.00272	0.00272	0.00339	0.00483529	0.00235834	0.00221459	0.0044162	0.00214868	0.00140154
	3797.79	0.00245	0.00707	0.00199	0.0027	0.0027	0.00339	0.00475777	0.00293032	0.0026091	0.0043332	0.00211633	0.00149132
	3797.55	0.00244	0.00705	0.00198	0.00268	0.00268	0.00339	0.0045594	0.00352919	0.00304988	0.00423579	0.0019392	0.00167714
	3797.31	0.00242	0.00703	0.00196	0.00266	0.00266	0.00339	0.00424747	0.00407145	0.0034852	0.00412489	0.00163668	0.00193501
	3797.07	0.00241	0.00701	0.00195	0.00264	0.00264	0.00339	0.00385671	0.0044664	0.00384897	0.0040129	0.00126145	0.00223537
	3796.83	0.0024	0.00698	0.00193	0.00262	0.00262	0.00339	0.00345052	0.00463218	0.0040686	0.00392445	0.00089213	0.00254479
	3796.59	0.00238	0.00696	0.00191	0.00259	0.0026	0.0034	0.00311549	0.0045227	0.004089	0.00389126	0.00061554	0.0028217
	3796.35	0.00237	0.00693	0.0019	0.00257	0.00258	0.0034	0.00292715	0.00416413	0.00390696	0.00393311	0.0004898	0.00302868
	3796.11	0.00235	0.00691	0.00188	0.00255	0.00256	0.0034	0.00291424	0.00364791	0.00357892	0.00404013	0.00051593	0.00313544
	3795.86	0.00234	0.00688	0.00187	0.00253	0.00254	0.0034	0.00304927	0.00309185	0.00319448	0.00417678	0.00064331	0.00313228
	3795.62	0.00233	0.00686	0.00185	0.00251	0.00252	0.00341	0.00327438	0.00258565	0.00283227	0.00429798	0.00080525	0.00302571
	3795.38	0.00231	0.00683	0.00184	0.00249	0.0025	0.00341	0.00352991	0.00217246	0.00253449	0.00436893	0.00095025	0.0028325
	3795.14	0.0023	0.00681	0.00182	0.00247	0.00248	0.00341	0.00377051	0.00185491	0.00230501	0.00437006	0.00105295	0.00257149
	3794.9	0.00228	0.00678	0.00181	0.00245	0.00246	0.00342	0.00396672	0.00161624	0.00212457	0.0042987	0.00110987	0.00226403
	3794.66	0.00227	0.00675	0.00179	0.00243	0.00244	0.00342	0.00410086	0.00143434	0.00196654	0.00416443	0.00113057	0.00193377
	3794.42	0.00225	0.00673	0.00178	0.0024	0.00242	0.00342	0.00416769	0.00129102	0.0018077	0.00398736	0.00112783	0.00160389
	3794.18	0.00224	0.0067	0.00176	0.00238	0.0024	0.00343	0.00417293	0.00117478	0.00163837	0.0037952	0.00111206	0.00129601
	3793.94	0.00222	0.00667	0.00175	0.00236	0.00238	0.00343	0.00413222	0.00108032	0.00146373	0.00361683	0.0010864	0.00102737
	3793.69	0.00221	0.00664	0.00173	0.00234	0.00236	0.00343	0.00406797	0.00100434	0.00130189	0.00347781	0.00105037	0.00080692
	3793.45	0.0022	0.00661	0.00172	0.00232	0.00234	0.00344	0.00400414	0.00094365	0.00117337	0.00339482	0.00100014	0.00063446
	3793.21	0.00218	0.00659	0.00171	0.0023	0.00232	0.00344	0.00395748	0.00089193	0.00109298	0.00337319	0.00093573	0.00050294
	3792.97	0.00217	0.00656	0.00169	0.00229	0.0023	0.00344	0.00393527	0.00084493	0.00106018	0.00340682	0.00086327	0.00040153
	3792.73	0.00215	0.00653	0.00168	0.00227	0.00229	0.00345	0.00393366	0.00079947	0.00105944	0.00348218	0.00079738	0.00032075
	3792.49	0.00214	0.0065	0.00167	0.00225	0.00227	0.00345	0.00394341	0.00075965	0.001065	0.00358327	0.00075607	0.00025493
	3792.25	0.00213	0.00647	0.00165	0.00223	0.00225	0.00346	0.00395504	0.0007335	0.00105275	0.00369463	0.00075628	0.00020188
	3792.01	0.00211	0.00644	0.00164	0.00221	0.00223	0.00346	0.00396487	0.0007311	0.00100809	0.00380592	0.00080511	0.00016346
	3791.77	0.0021	0.00642	0.00163	0.00219	0.00222	0.00347	0.00397397	0.0007594	0.00093284	0.00390834	0.00089651	0.0001414
	3791.53	0.00209	0.00639	0.00162	0.00218	0.0022	0.00347	0.00398584	0.00081585	0.00084401	0.00399763	0.00101016	0.00013755
	3791.28	0.00207	0.00636	0.00161	0.00216	0.00218	0.00348	0.00400425	0.00088888	0.00076799	0.0040723	0.00111724	0.00015323
	3791.04	0.00206	0.00633	0.0016	0.00214	0.00217	0.00348	0.00402625	0.00095867	0.0007311	0.0041334	0.00118697	0.00018966
	3790.8	0.00205	0.0063	0.00158	0.00213	0.00215	0.00349	0.00404645	0.00100585	0.00075405	0.00418599	0.00119935	0.00025206
	3790.56	0.00203	0.00627	0.00157	0.00211	0.00214	0.00349	0.0040602	0.00101716	0.00084441	0.00423665	0.00115172	0.00034697
	3790.32	0.00202	0.00624	0.00156	0.0021	0.00212	0.0035	0.0040674	0.0009903	0.0009984	0.00429236	0.00106136	0.00048247
	3790.08	0.00201	0.00622	0.00155	0.00208	0.00211	0.0035	0.00407706	0.00093539	0.00120302	0.00435836	0.00096049	0.00066431
	3789.84	0.002	0.00619	0.00154	0.00207	0.00209	0.0035	0.00410453	0.00086883	0.0014397	0.00443495	0.0008871	0.00089224
	3789.6	0.00198	0.00616	0.00153	0.00205	0.00208	0.00351	0.00416457	0.00080754	0.00168757	0.00451668	0.00087211	0.00115664
	3789.36	0.00197	0.00613	0.00153	0.00204	0.00206	0.00351	0.00426317	0.00076298	0.00192466	0.00459348	0.00092912	0.00143635
	3789.11	0.00196	0.00611	0.00152	0.00202	0.00205	0.00352	0.00439085	0.00073623	0.00213137	0.00465246	0.00104792	0.00170409
	3788.87	0.00195	0.00608	0.00151	0.00201	0.00204	0.00352	0.0045213	0.00072351	0.00229415	0.00468198	0.00119692	0.00193259
	3788.63	0.00194	0.00605	0.0015	0.002	0.00203	0.00353	0.00462005	0.00071688	0.00240541	0.00467735	0.00133587	0.00210101
	3788.39	0.00193	0.00603	0.00149	0.00199	0.00202	0.00353	0.00465614	0.00071426	0.00246814	0.00464059	0.00142513	0.00220139
	3788.15	0.00192	0.006	0.00149	0.00198	0.00201	0.00354	0.00461324	0.00071881	0.00249437	0.00458132	0.00144006	0.00224042
	3787.91	0.0019	0.00597	0.00148	0.00196	0.00199	0.00354	0.00449758	0.00074054	0.00250084	0.00451394	0.00137535	0.00223529
	3787.67	0.00189	0.00595	0.00147	0.00195	0.00198	0.00355	0.00433581	0.00079	0.00250602	0.00445493	0.00124647	0.00220915
	3787.43	0.00188	0.00592	0.00146	0.00194	0.00198	0.00355	0.0041687	0.00087489	0.00252402	0.00441783	0.00108354	0.00218497
	3787.19	0.00187	0.0059	0.00146	0.00193	0.00197	0.00356	0.00403795	0.0009933	0.00255975	0.00441114	0.00092115	0.00217854
	3786.95	0.00186	0.00587	0.00145	0.00192	0.00196	0.00356	0.0039735	0.0011356	0.00260872	0.0044335	0.00078997	0.00219533
	3786.7	0.00186	0.00585	0.00145	0.00192	0.00195	0.00357	0.00398496	0.00128999	0.00266041	0.00447493	0.00070938	0.00223034
	3786.46	0.00185	0.00583	0.00144	0.00191	0.00194	0.00357	0.00406152	0.00144601	0.00270264	0.00451613	0.00068547	0.002271
	3786.22	0.00184	0.0058	0.00144	0.0019	0.00193	0.00357	0.00417726	0.00160102	0.00272799	0.00453595	0.00071319	0.00230249
	3785.98	0.00183	0.00578	0.00143	0.00189	0.00193	0.00358	0.00430099	0.00176152	0.00273788	0.00451242	0.00077993	0.0023133
	3785.74	0.00182	0.00576	0.00143	0.00188	0.00192	0.00358	0.00440284	0.00193805	0.00274177	0.00443236	0.0008716	0.00230049
	3785.5	0.00181	0.00574	0.00142	0.00188	0.00191	0.00359	0.00445923	0.00213687	0.00275287	0.0042966	0.00097372	0.00226905
	3785.26	0.0018	0.00571	0.00142	0.00187	0.00191	0.00359	0.00445752	0.00235182	0.00278179	0.00412486	0.00107367	0.00223524
	3785.02	0.00179	0.00569	0.00142	0.00187	0.0019	0.00359	0.00439738	0.00255792	0.00283045	0.00395733	0.00116094	0.00221966
	3784.78	0.00179	0.00567	0.00141	0.00186	0.0019	0.0036	0.0042927	0.00271212	0.00288818	0.00384321	0.00122924	0.00224142
	3784.53	0.00178	0.00565	0.00141	0.00186	0.00189	0.0036	0.00416651	0.00276784	0.00293318	0.00382205	0.00127631	0.00230754
	3784.29	0.00177	0.00563	0.00141	0.00185	0.00189	0.0036	0.00404786	0.00269144	0.00294084	0.00390656	0.00130316	0.00240962
	3784.05	0.00176	0.00561	0.00141	0.00185	0.00188	0.00361	0.00396112	0.00247696	0.00289329	0.00407589	0.00131203	0.00252435
	3783.81	0.00176	0.00559	0.0014	0.00184	0.00188	0.00361	0.00392169	0.00214896	0.00278461	0.00428834	0.00130392	0.00262208
	3783.57	0.00175	0.00558	0.0014	0.00184	0.00188	0.00361	0.00393256	0.00175278	0.00262005	0.0044964	0.00127874	0.00267315
	3783.33	0.00174	0.00556	0.0014	0.00184	0.00187	0.00361	0.00398706	0.00134371	0.00241316	0.00466376	0.00123327	0.00265795
	3783.09	0.00174	0.00554	0.0014	0.00183	0.00187	0.00362	0.00407147	0.00097196	0.00218326	0.00476881	0.0011633	0.00256825
	3782.85	0.00173	0.00552	0.0014	0.00183	0.00187	0.00362	0.00416574	0.00067724	0.00195187	0.00480699	0.00106941	0.00240865
	3782.61	0.00172	0.00551	0.00139	0.00183	0.00186	0.00362	0.00424956	0.00048186	0.00174278	0.00478635	0.00095657	0.00219349
	3782.36	0.00172	0.00549	0.00139	0.00183	0.00186	0.00362	0.00430535	0.00039067	0.00158195	0.00472404	0.00083739	0.00194794
	3782.12	0.00171	0.00548	0.00139	0.00182	0.00186	0.00362	0.00432361	0.00039023	0.00149447	0.00464179	0.00072908	0.00170192
	3781.88	0.0017	0.00546	0.00139	0.00182	0.00186	0.00362	0.00430675	0.00045731	0.00149828	0.00456016	0.00064993	0.00148551
	3781.64	0.0017	0.00545	0.00139	0.00182	0.00186	0.00363	0.00426844	0.00056568	0.00159923	0.00449609	0.00061241	0.00131942
	3781.4	0.00169	0.00543	0.00139	0.00182	0.00186	0.00363	0.00422999	0.00069959	0.00178819	0.00446002	0.00061801	0.00121618
	3781.16	0.00169	0.00542	0.00139	0.00182	0.00185	0.00363	0.00421419	0.00085826	0.00204477	0.00445922	0.00065868	0.00117689
	3780.92	0.00168	0.00541	0.00139	0.00182	0.00185	0.00363	0.00423931	0.00105886	0.00234224	0.00449865	0.00072054	0.00119819
	3780.68	0.00167	0.00539	0.00139	0.00182	0.00185	0.00363	0.00431885	0.0013294	0.00265312	0.00458413	0.00079141	0.00127502
	3780.44	0.00167	0.00538	0.00139	0.00182	0.00185	0.00363	0.00445618	0.00169587	0.0029507	0.00471752	0.00086376	0.00140436
	3780.2	0.00166	0.00537	0.00139	0.00182	0.00185	0.00363	0.00464536	0.0021652	0.00320823	0.00489101	0.00093959	0.00158246
	3779.95	0.00166	0.00536	0.00138	0.00182	0.00185	0.00363	0.00486135	0.00270069	0.00339919	0.00507724	0.0010279	0.00179915
	3779.71	0.00165	0.00535	0.00138	0.00182	0.00185	0.00363	0.00506008	0.0032088	0.00350131	0.00522433	0.00113963	0.0020303
	3779.47	0.00165	0.00534	0.00138	0.00182	0.00185	0.00363	0.00518853	0.00356269	0.00350378	0.00527496	0.00127576	0.00223773
	3779.23	0.00164	0.00533	0.00138	0.00182	0.00185	0.00362	0.00521498	0.00366464	0.0034185	0.00519925	0.00142265	0.00238527
	3778.99	0.00164	0.00532	0.00138	0.00182	0.00185	0.00362	0.00514605	0.00350346	0.00327207	0.00501955	0.00155374	0.00245595
	3778.75	0.00163	0.00531	0.00138	0.00182	0.00185	0.00362	0.00502039	0.00315294	0.00309661	0.00479527	0.00164675	0.00245645
	3778.51	0.00163	0.0053	0.00138	0.00182	0.00185	0.00362	0.00488051	0.00272275	0.00291657	0.00458595	0.00168944	0.00241014
	3778.27	0.00162	0.0053	0.00138	0.00182	0.00185	0.00362	0.00475826	0.00231141	0.00274986	0.00443104	0.00168024	0.00234147
	3778.03	0.00161	0.00529	0.00138	0.00183	0.00185	0.00362	0.00466863	0.00198392	0.00260705	0.00434499	0.00162347	0.0022703
	3777.78	0.00161	0.00528	0.00138	0.00183	0.00185	0.00361	0.00461355	0.00176986	0.00249596	0.0043236	0.00152682	0.00220606
	3777.54	0.00161	0.00528	0.00138	0.00183	0.00185	0.00361	0.00458438	0.0016679	0.00241986	0.00434733	0.00139546	0.00215138
	3777.3	0.0016	0.00527	0.00138	0.00183	0.00185	0.00361	0.00456646	0.00165247	0.00237638	0.00438963	0.00123362	0.00210201
	3777.06	0.0016	0.00527	0.00138	0.00183	0.00185	0.00361	0.00454284	0.0016844	0.00235588	0.00442524	0.00104569	0.00205192
	3776.82	0.00159	0.00526	0.00138	0.00183	0.00184	0.0036	0.00450074	0.00172195	0.00234117	0.00443678	0.00083873	0.00199433
	3776.58	0.00159	0.00526	0.00138	0.00184	0.00184	0.0036	0.00443609	0.00173366	0.00231304	0.00442096	0.00062564	0.00192649
	3776.34	0.00158	0.00526	0.00138	0.00184	0.00184	0.0036	0.00435445	0.00170385	0.00225511	0.00438532	0.00042335	0.00184994
	3776.1	0.00158	0.00525	0.00137	0.00184	0.00184	0.0036	0.00427119	0.00163385	0.00215925	0.00434768	0.00025384	0.0017708
	3775.86	0.00157	0.00525	0.00137	0.00184	0.00184	0.00359	0.00420186	0.00153757	0.0020287	0.004322	0.00013648	0.00169559
	3775.61	0.00157	0.00525	0.00137	0.00185	0.00184	0.00359	0.00415867	0.00143425	0.00187566	0.00431638	8.174e-05	0.00163147
	3775.37	0.00156	0.00525	0.00137	0.00185	0.00184	0.00358	0.00414241	0.00134286	0.0017218	0.00432628	8.819e-05	0.00158332
	3775.13	0.00156	0.00525	0.00137	0.00185	0.00184	0.00358	0.00414325	0.00127622	0.00158901	0.00433759	0.00014088	0.00155343
	3774.89	0.00155	0.00525	0.00137	0.00185	0.00184	0.00358	0.00414206	0.0012391	0.00149736	0.0043316	0.00021718	0.00153999
	3774.65	0.00155	0.00525	0.00137	0.00186	0.00184	0.00357	0.00411686	0.00122832	0.00145922	0.00429108	0.00029471	0.00153975
	3774.41	0.00155	0.00525	0.00137	0.00186	0.00184	0.00357	0.0040532	0.00123368	0.00147792	0.00420669	0.00036051	0.00154472
	3774.17	0.00154	0.00525	0.00137	0.00186	0.00184	0.00357	0.00394986	0.00124157	0.00154555	0.00408158	0.00041326	0.00154545
	3773.93	0.00154	0.00526	0.00137	0.00187	0.00184	0.00356	0.00381946	0.00123571	0.00164516	0.00393059	0.00046419	0.00152868
	3773.69	0.00154	0.00526	0.00136	0.00187	0.00184	0.00356	0.00368707	0.00120405	0.00175316	0.00377661	0.00052742	0.00148276
	3773.45	0.00153	0.00526	0.00136	0.00187	0.00184	0.00355	0.00358129	0.00114093	0.00184479	0.00364314	0.00061459	0.00139951
	3773.2	0.00153	0.00527	0.00136	0.00188	0.00184	0.00355	0.00352633	0.00105248	0.00190136	0.00355095	0.00072851	0.001282
	3772.96	0.00152	0.00527	0.00136	0.00188	0.00184	0.00354	0.00353558	0.0009556	0.00191583	0.00351068	0.00086099	0.00114336
	3772.72	0.00152	0.00528	0.00136	0.00189	0.00184	0.00354	0.00360634	0.0008761	0.00189662	0.00352033	0.00099563	0.00100916
	3772.48	0.00152	0.00528	0.00136	0.00189	0.00184	0.00353	0.00372221	0.00084257	0.00186586	0.00356481	0.0011154	0.00091045
	3772.24	0.00152	0.00529	0.00136	0.0019	0.00184	0.00353	0.00385612	0.00087802	0.00185342	0.00361998	0.00120577	0.00087528
	3772	0.00151	0.0053	0.00136	0.0019	0.00184	0.00353	0.00397515	0.0009935	0.00188868	0.00365505	0.00126145	0.00092038
	3771.76	0.00151	0.00531	0.00136	0.00191	0.00185	0.00352	0.00404931	0.00118634	0.0019891	0.00364288	0.00128203	0.0010442
	3771.52	0.00151	0.00532	0.00135	0.00191	0.00185	0.00352	0.00405519	0.00144128	0.00215931	0.00356244	0.0012728	0.00123113
	3771.28	0.00151	0.00533	0.00135	0.00192	0.00185	0.00351	0.0039807	0.00173954	0.00238793	0.00340783	0.00123625	0.0014559
	3771.03	0.0015	0.00534	0.00135	0.00192	0.00185	0.00351	0.00382619	0.00206128	0.00265213	0.00318976	0.00117303	0.00169321
	3770.79	0.0015	0.00535	0.00135	0.00193	0.00185	0.0035	0.00360886	0.00238791	0.00292378	0.00294228	0.00107764	0.0019255
	3770.55	0.0015	0.00536	0.00135	0.00194	0.00185	0.0035	0.00337048	0.00269563	0.00316975	0.00272866	0.0009448	0.00214381
	3770.31	0.0015	0.00537	0.00135	0.00194	0.00185	0.00349	0.00318252	0.00294784	0.00335557	0.00264143	0.0007733	0.00234521
	3770.07	0.0015	0.00539	0.00135	0.00195	0.00186	0.00349	0.00313415	0.00309379	0.00345201	0.00277424	0.00057785	0.00252219
	3769.83	0.0015	0.0054	0.00135	0.00196	0.00186	0.00348	0.00328847	0.00308558	0.00344458	0.00315936	0.00038847	0.00265685
	3769.59	0.0015	0.00542	0.00135	0.00196	0.00186	0.00348	0.00361891	0.00291249	0.00334521	0.00371606	0.00023733	0.0027206
	3769.35	0.0015	0.00543	0.00135	0.00197	0.00187	0.00347	0.00402462	0.00261519	0.00318223	0.0042942	0.00014179	0.00269269
	3769.11	0.0015	0.00545	0.00135	0.00198	0.00187	0.00347	0.00439378	0.00226212	0.00298425	0.00476786	9.885e-05	0.00256842
	3768.86	0.0015	0.00547	0.00135	0.00199	0.00187	0.00346	0.00465957	0.00191881	0.00276797	0.00508705	9.458e-05	0.00236184
	3768.62	0.0015	0.00549	0.00135	0.002	0.00188	0.00346	0.00480315	0.00163028	0.00254365	0.00525635	0.00011752	0.0020992
	3768.38	0.0015	0.0055	0.00135	0.00201	0.00188	0.00345	0.00483451	0.00142423	0.00231891	0.00530491	0.00016516	0.00181259
	3768.14	0.0015	0.00552	0.00135	0.00202	0.00189	0.00345	0.00477444	0.00131286	0.00210606	0.00526377	0.00024141	0.00153561
	3767.9	0.0015	0.00555	0.00135	0.00203	0.00189	0.00344	0.00464841	0.00129858	0.00192011	0.00516144	0.00035219	0.00129879
	3767.66	0.0015	0.00557	0.00136	0.00204	0.0019	0.00344	0.004481	0.00137661	0.00177888	0.0050196	0.00050195	0.00112656
	3767.42	0.00151	0.00559	0.00136	0.00205	0.0019	0.00343	0.00429536	0.00153445	0.00169613	0.00485682	0.00069119	0.00103236
	3767.18	0.00151	0.00561	0.00136	0.00206	0.00191	0.00343	0.00410628	0.00175978	0.00168123	0.00468622	0.00091383	0.00101843
	3766.94	0.00151	0.00564	0.00136	0.00207	0.00192	0.00342	0.00392075	0.00204389	0.00173843	0.00451568	0.00116197	0.00108207
	3766.7	0.00151	0.00566	0.00137	0.00208	0.00193	0.00342	0.00373658	0.00237898	0.00187106	0.0043506	0.00142143	0.00122198
	3766.45	0.00152	0.00569	0.00137	0.0021	0.00193	0.00341	0.00354596	0.00275321	0.00207935	0.00419475	0.00167457	0.00144296
	3766.21	0.00152	0.00572	0.00137	0.00211	0.00194	0.00341	0.00333871	0.0031345	0.00235503	0.00405192	0.00189324	0.00174871
	3765.97	0.00153	0.00574	0.00138	0.00212	0.00195	0.0034	0.00311222	0.00346205	0.00267222	0.00392866	0.00204213	0.0021322
	3765.73	0.00153	0.00577	0.00138	0.00214	0.00196	0.0034	0.00287907	0.00365411	0.00297816	0.00383328	0.00208756	0.00255465
	3765.49	0.00153	0.0058	0.00138	0.00215	0.00197	0.00339	0.0026649	0.00364603	0.00320544	0.00377234	0.00201403	0.00294816
	3765.25	0.00154	0.00583	0.00139	0.00217	0.00198	0.00338	0.00249868	0.00342895	0.00329904	0.00374805	0.0018399	0.0032361
	3765.01	0.00154	0.00586	0.00139	0.00218	0.00199	0.00338	0.0023977	0.00305507	0.00323926	0.00375833	0.00160728	0.00336566
	3764.77	0.00155	0.00589	0.0014	0.0022	0.00201	0.00337	0.00236618	0.00260989	0.00304449	0.00379873	0.00136624	0.00332106
	3764.53	0.00156	0.00593	0.0014	0.00221	0.00202	0.00337	0.00240034	0.00217999	0.00275624	0.00386504	0.00116155	0.00311795
	3764.28	0.00156	0.00596	0.00141	0.00223	0.00203	0.00336	0.00249137	0.00183071	0.0024276	0.00395117	0.00102802	0.00279019
	3764.04	0.00157	0.00599	0.00142	0.00225	0.00204	0.00335	0.00262734	0.00160248	0.00211333	0.00404863	0.00098794	0.00238416
	3763.8	0.00158	0.00603	0.00142	0.00227	0.00206	0.00335	0.00278916	0.00150584	0.00186243	0.00414357	0.0010506	0.00195381
	3763.56	0.00158	0.00607	0.00143	0.00229	0.00207	0.00334	0.00295511	0.00152091	0.00170894	0.00421911	0.0012079	0.00155632
	3763.32	0.00159	0.0061	0.00144	0.0023	0.00209	0.00334	0.00310007	0.00160084	0.00166338	0.00425911	0.00143393	0.00124196
	3763.08	0.0016	0.00614	0.00145	0.00232	0.00211	0.00333	0.00320518	0.00168368	0.00170787	0.00425293	0.00168815	0.00104481
	3762.84	0.00161	0.00618	0.00145	0.00234	0.00212	0.00332	0.00326329	0.00170876	0.00180229	0.0041999	0.00192419	0.000975
	3762.6	0.00161	0.00622	0.00146	0.00237	0.00214	0.00332	0.00328161	0.00163596	0.00189685	0.00411025	0.00210163	0.00101561
	3762.36	0.00162	0.00626	0.00147	0.00239	0.00216	0.00331	0.00327813	0.00145552	0.00195114	0.00400294	0.00219244	0.0011285
	3762.11	0.00163	0.0063	0.00148	0.00241	0.00218	0.0033	0.00327352	0.00119016	0.00194619	0.00389662	0.00218837	0.00126597
	3761.87	0.00164	0.00634	0.00149	0.00243	0.00219	0.00329	0.00328219	0.00088628	0.00188918	0.00380726	0.00209834	0.00138137
	3761.63	0.00165	0.00638	0.0015	0.00245	0.00221	0.00329	0.00330966	0.00059927	0.00181067	0.00374336	0.00194554	0.00144313
	3761.39	0.00166	0.00642	0.00151	0.00248	0.00223	0.00328	0.00335049	0.00038219	0.00175149	0.00370616	0.00176098	0.00144039
	3761.15	0.00167	0.00647	0.00152	0.0025	0.00226	0.00327	0.0033969	0.00027856	0.00175308	0.00369373	0.00157689	0.00138768
	3760.91	0.00168	0.00651	0.00153	0.00252	0.00228	0.00326	0.00344185	0.00032257	0.00184739	0.00370371	0.00142521	0.00132095
	3760.67	0.00169	0.00655	0.00155	0.00255	0.0023	0.00325	0.00348761	0.00053945	0.00205117	0.00373683	0.00133787	0.00129551
	3760.43	0.0017	0.0066	0.00156	0.00257	0.00232	0.00325	0.00354551	0.00094319	0.00236	0.0037953	0.00134317	0.00137404
	3760.19	0.00171	0.00664	0.00157	0.0026	0.00234	0.00324	0.00363492	0.00151974	0.0027341	0.00387979	0.00145762	0.00161009
	3759.95	0.00172	0.00669	0.00158	0.00262	0.00237	0.00323	0.00376806	0.0022038	0.00309721	0.00397817	0.00167162	0.00200964
	3759.7	0.00173	0.00674	0.0016	0.00265	0.00239	0.00322	0.00393425	0.00287038	0.00334583	0.00406266	0.00193381	0.00249848
	3759.46	0.00175	0.00678	0.00161	0.00267	0.00242	0.00321	0.00408846	0.00337457	0.00339914	0.00409768	0.00216366	0.0029308
	3759.22	0.00176	0.00683	0.00162	0.0027	0.00244	0.0032	0.00417712	0.00362914	0.00324854	0.0040643	0.00229352	0.00316564
	3758.98	0.00177	0.00688	0.00164	0.00273	0.00247	0.00319	0.00417513	0.00364546	0.00295463	0.00397299	0.00230279	0.00314037
	3758.74	0.00178	0.00692	0.00165	0.00275	0.00249	0.00318	0.00409327	0.00350334	0.00260574	0.00385237	0.00221652	0.00288609
	3758.5	0.00179	0.00697	0.00167	0.00278	0.00252	0.00317	0.00396235	0.00329919	0.00227662	0.00373199	0.00208095	0.00248306
	3758.26	0.0018	0.00702	0.00168	0.00281	0.00255	0.00316	0.0038147	0.00311181	0.00201739	0.00363114	0.00193777	0.00202445
	3758.02	0.00182	0.00707	0.0017	0.00284	0.00257	0.00315	0.00367599	0.00299457	0.00185737	0.00356002	0.00181412	0.00159397
	3757.78	0.00183	0.00712	0.00171	0.00287	0.0026	0.00314	0.00356371	0.0029789	0.00181264	0.00352169	0.00172401	0.00126371
	3757.53	0.00184	0.00717	0.00173	0.00289	0.00263	0.00313	0.0034882	0.00307665	0.00188991	0.00351632	0.00166484	0.00108954
	3757.29	0.00185	0.00722	0.00175	0.00292	0.00266	0.00312	0.00345299	0.00327741	0.00208322	0.00354077	0.00162247	0.00110968
	3757.05	0.00186	0.00726	0.00176	0.00295	0.00269	0.00311	0.00345663	0.00354615	0.00237014	0.00359313	0.00157403	0.00133244
	3756.81	0.00188	0.00731	0.00178	0.00298	0.00272	0.0031	0.00349166	0.00381943	0.00270487	0.00367193	0.00149787	0.00172305
	3756.57	0.00189	0.00736	0.0018	0.00301	0.00275	0.00308	0.00354482	0.0040178	0.00302398	0.00377258	0.00138472	0.00219946
	3756.33	0.0019	0.00741	0.00181	0.00304	0.00278	0.00307	0.00359829	0.00407341	0.00326305	0.00388483	0.00124659	0.00265353
	3756.09	0.00191	0.00746	0.00183	0.00307	0.00281	0.00306	0.00363396	0.00395429	0.0033842	0.00398924	0.00111196	0.00299075
	3755.85	0.00193	0.00751	0.00185	0.0031	0.00284	0.00305	0.0036358	0.00367763	0.00338626	0.00405953	0.00101624	0.00316413
	3755.61	0.00194	0.00756	0.00187	0.00313	0.00287	0.00304	0.0035934	0.00329244	0.00330007	0.00406977	0.00098629	0.00317937
	3755.36	0.00195	0.00761	0.00188	0.00316	0.0029	0.00302	0.00350038	0.00285954	0.00317237	0.0039993	0.00103697	0.00307902
	3755.12	0.00196	0.00766	0.0019	0.00319	0.00293	0.00301	0.00335773	0.0024359	0.00305024	0.00383686	0.00117066	0.00291826
	3754.88	0.00197	0.00771	0.00192	0.00322	0.00296	0.003	0.00317315	0.00206968	0.00297292	0.00358257	0.00138137	0.00274945
	3754.64	0.00199	0.00776	0.00194	0.00325	0.00299	0.00299	0.00296348	0.00179925	0.00296812	0.00325136	0.00165491	0.0026114
	3754.4	0.002	0.0078	0.00196	0.00328	0.00302	0.00297	0.0027526	0.00165225	0.00304924	0.00287429	0.00196952	0.00252746
	3754.16	0.00201	0.00785	0.00198	0.00331	0.00305	0.00296	0.00257014	0.00164611	0.00321524	0.0024978	0.002297	0.00250026
	3753.92	0.00202	0.0079	0.00199	0.00334	0.00308	0.00295	0.002445	0.00178866	0.00345242	0.00217579	0.00260792	0.00251561
	3753.68	0.00203	0.00795	0.00201	0.00337	0.00311	0.00294	0.00239992	0.0020833	0.00373968	0.0019605	0.00287775	0.00254531
	3753.44	0.00204	0.00799	0.00203	0.00339	0.00314	0.00292	0.00245103	0.0025419	0.00405652	0.00189786	0.00309196	0.00256196
	3753.2	0.00206	0.00804	0.00205	0.00342	0.00317	0.00291	0.00260866	0.00319389	0.00439226	0.00202259	0.00324924	0.00254943
	3752.95	0.00207	0.00809	0.00207	0.00345	0.0032	0.0029	0.00288446	0.00409011	0.00474597	0.00236145	0.00336059	0.0025224
	3752.71	0.00208	0.00813	0.00209	0.00348	0.00323	0.00289	0.00329104	0.00527003	0.00511733	0.00292672	0.00344395	0.00253703
	3752.47	0.00209	0.00818	0.00211	0.00351	0.00326	0.00287	0.00380815	0.00667799	0.00548714	0.00366799	0.0035129	0.00269262
	3752.23	0.0021	0.00822	0.00212	0.00354	0.00329	0.00286	0.00433813	0.00805528	0.00579916	0.00440995	0.00356003	0.00307545
	3751.99	0.00211	0.00826	0.00214	0.00356	0.00332	0.00285	0.00470503	0.00899974	0.00597218	0.00488525	0.00355868	0.00365133
	3751.75	0.00212	0.00831	0.00216	0.00359	0.00335	0.00284	0.0047835	0.00926352	0.00597109	0.00494742	0.00348278	0.00424943
	3751.51	0.00213	0.00835	0.00218	0.00362	0.00338	0.00283	0.00460321	0.0089385	0.00583119	0.0046781	0.00333498	0.00469706
	3751.27	0.00214	0.00839	0.0022	0.00365	0.00341	0.00281	0.00427217	0.00828352	0.00562067	0.00424627	0.00313778	0.0049259
	3751.03	0.00215	0.00843	0.00221	0.00367	0.00344	0.0028	0.00388115	0.00751825	0.00539359	0.00376631	0.00291334	0.00495248
	3750.78	0.00216	0.00847	0.00223	0.0037	0.00347	0.00279	0.0034812	0.00676999	0.00518578	0.00328105	0.00267805	0.00482333
	3750.54	0.00216	0.00851	0.00225	0.00372	0.00349	0.00278	0.0031085	0.00610571	0.00502791	0.0027994	0.00243963	0.00458866
	3750.3	0.00217	0.00855	0.00227	0.00375	0.00352	0.00277	0.00280475	0.00557687	0.00495352	0.0023288	0.00220737	0.00429966
	3750.06	0.00218	0.00859	0.00228	0.00377	0.00355	0.00276	0.00263523	0.00524198	0.0050027	0.0019055	0.00199409	0.00402432
	3749.82	0.00219	0.00863	0.0023	0.0038	0.00357	0.00275	0.00268152	0.00515984	0.00520337	0.00161299	0.00182711	0.0038435
	3749.58	0.0022	0.00866	0.00232	0.00382	0.0036	0.00274	0.00298769	0.0053381	0.00552497	0.00156907	0.0017427	0.00382667
	3749.34	0.0022	0.0087	0.00233	0.00384	0.00363	0.00273	0.00347394	0.00566965	0.00584727	0.0018287	0.00177021	0.00396708
	3749.1	0.00221	0.00873	0.00235	0.00386	0.00365	0.00272	0.00394897	0.0059611	0.00601483	0.00229476	0.00189765	0.00415531
	3748.86	0.00222	0.00877	0.00237	0.00389	0.00367	0.00271	0.0042627	0.00607152	0.00595575	0.00278577	0.00208315	0.00426143
	3748.62	0.00222	0.0088	0.00238	0.00391	0.0037	0.0027	0.00439313	0.00599266	0.00570464	0.00317932	0.00227834	0.00422715
	3748.37	0.00223	0.00883	0.0024	0.00393	0.00372	0.00269	0.00439744	0.00579456	0.00534626	0.00344553	0.00245844	0.00407407
	3748.13	0.00224	0.00886	0.00241	0.00395	0.00374	0.00268	0.00433292	0.00555455	0.00495548	0.00360422	0.00260937	0.0038567
	3747.89	0.00224	0.00889	0.00243	0.00397	0.00376	0.00268	0.00423528	0.0053265	0.00458662	0.00368548	0.00272564	0.00363293
	3747.65	0.00225	0.00892	0.00244	0.00398	0.00379	0.00267	0.00411426	0.00513587	0.00427482	0.00371451	0.00280486	0.00344996
	3747.41	0.00225	0.00895	0.00246	0.004	0.00381	0.00266	0.00396734	0.00498494	0.00404094	0.00370649	0.00284989	0.00333829
	3747.17	0.00226	0.00898	0.00247	0.00402	0.00383	0.00266	0.00378705	0.00485754	0.00389233	0.0036718	0.00287267	0.00330849
	3746.93	0.00226	0.00901	0.00248	0.00404	0.00384	0.00265	0.00357178	0.00472918	0.00382271	0.00361716	0.00289355	0.00334725
	3746.69	0.00226	0.00903	0.0025	0.00405	0.00386	0.00265	0.00332947	0.00458005	0.00381518	0.00354604	0.0029376	0.00342374
	3746.45	0.00227	0.00906	0.00251	0.00407	0.00388	0.00264	0.00307306	0.00440543	0.00385151	0.00345763	0.00302993	0.00349989
	3746.2	0.00227	0.00908	0.00252	0.00408	0.0039	0.00264	0.00281586	0.00422413	0.00392178	0.00334708	0.00319257	0.00354504
	3745.96	0.00227	0.0091	0.00253	0.00409	0.00391	0.00263	0.00256206	0.00408293	0.0040335	0.00320058	0.00344164	0.00354526
	3745.72	0.00228	0.00912	0.00254	0.00411	0.00393	0.00263	0.00229739	0.00406357	0.00422161	0.00299002	0.00379387	0.00351351
	3745.48	0.00228	0.00914	0.00255	0.00412	0.00394	0.00263	0.00198473	0.00429478	0.00455812	0.00266724	0.00426783	0.00350095
	3745.24	0.00228	0.00916	0.00256	0.00413	0.00395	0.00263	0.00156391	0.00496364	0.00515101	0.00216208	0.00487853	0.00361196
	3745	0.00228	0.00918	0.00257	0.00414	0.00397	0.00262	0.000980832	0.0062711	0.00610105	0.00141405	0.00559121	0.00401228
	3744.76	0.00228	0.0092	0.00258	0.00415	0.00398	0.00262	0.000322567	0.00816159	0.00731176	0.000529117	0.00620989	0.00483477
	3744.52	0.00228	0.00921	0.00259	0.00415	0.00399	0.00262	0	0.00986825	0.00822968	0	0.006343	0.00588147
	3744.28	0.00228	0.00923	0.0026	0.00416	0.004	0.00262	0.00039286	0.0102842	0.00818413	0.000299662	0.00579301	0.00654288
	3744.03	0.00228	0.00924	0.00261	0.00417	0.00401	0.00262	0.00122592	0.00933848	0.00726183	0.00113234	0.00488669	0.00647719
	3743.79	0.00228	0.00925	0.00261	0.00417	0.00401	0.00263	0.00204213	0.00782476	0.00605158	0.00196606	0.00402701	0.00590267
	3743.55	0.00228	0.00927	0.00262	0.00418	0.00402	0.00263	0.00266743	0.00633864	0.00494389	0.00259499	0.0033529	0.00513968
	3743.31	0.00228	0.00928	0.00263	0.00418	0.00403	0.00263	0.00310224	0.005085	0.00406054	0.00302048	0.00285938	0.00437554
	3743.07	0.00228	0.00929	0.00263	0.00418	0.00403	0.00263	0.00338257	0.00408708	0.00340998	0.00328855	0.00251558	0.00369107
	3742.83	0.00228	0.0093	0.00264	0.00419	0.00403	0.00264	0.00354282	0.00332104	0.00297501	0.00344112	0.00230527	0.00312612
	3742.59	0.00228	0.0093	0.00264	0.00419	0.00404	0.00264	0.00361077	0.0027658	0.00273922	0.00351123	0.00222785	0.00270496
	3742.35	0.00228	0.00931	0.00265	0.00419	0.00404	0.00264	0.00361085	0.00241229	0.00268675	0.00352684	0.00228555	0.00244638
	3742.11	0.00227	0.00932	0.00265	0.00419	0.00404	0.00265	0.00356878	0.00225889	0.0027961	0.00351679	0.00246977	0.00235928
	3741.87	0.00227	0.00932	0.00265	0.00418	0.00404	0.00265	0.00350955	0.00230371	0.00303236	0.00350666	0.00275158	0.00243639
	3741.62	0.00227	0.00933	0.00266	0.00418	0.00404	0.00266	0.0034604	0.00252769	0.00334264	0.00352139	0.00306994	0.00264791
	3741.38	0.00226	0.00933	0.00266	0.00418	0.00404	0.00267	0.00344397	0.00288319	0.00365417	0.00357634	0.00333895	0.00293329
	3741.14	0.00226	0.00933	0.00266	0.00417	0.00403	0.00267	0.00347291	0.00328887	0.00388955	0.00366885	0.00347121	0.00321103
	3740.9	0.00225	0.00933	0.00266	0.00417	0.00403	0.00268	0.00354236	0.00364781	0.00398838	0.00377806	0.0034154	0.00340046
	3740.66	0.00225	0.00934	0.00266	0.00416	0.00402	0.00269	0.00363485	0.00388522	0.00393097	0.00387402	0.00318325	0.0034533
	3740.42	0.00224	0.00934	0.00266	0.00415	0.00402	0.0027	0.00372718	0.00397561	0.00373952	0.0039341	0.00284139	0.00336707
	3740.18	0.00224	0.00933	0.00266	0.00415	0.00401	0.0027	0.00380097	0.00394294	0.00346186	0.00395122	0.00247673	0.00317395
	3739.94	0.00223	0.00933	0.00265	0.00414	0.004	0.00271	0.00384535	0.00383834	0.00314743	0.00393203	0.00216222	0.00292049
	3739.7	0.00223	0.00933	0.00265	0.00413	0.00399	0.00272	0.00385516	0.0037157	0.002839	0.00388747	0.00194366	0.0026496
	3739.45	0.00222	0.00933	0.00265	0.00411	0.00398	0.00273	0.00382759	0.00361695	0.00256815	0.00382873	0.00183999	0.00239391
	3739.21	0.00221	0.00932	0.00265	0.0041	0.00397	0.00274	0.0037621	0.00356328	0.00236075	0.00376257	0.00185048	0.00217495
	3738.97	0.00221	0.00932	0.00264	0.00409	0.00396	0.00275	0.00365988	0.00355521	0.0022365	0.00369092	0.00195866	0.0020043
	3738.73	0.0022	0.00931	0.00264	0.00408	0.00395	0.00276	0.00352629	0.00357443	0.00220878	0.00360988	0.00213441	0.00188379
	3738.49	0.00219	0.0093	0.00263	0.00406	0.00394	0.00277	0.00337181	0.00359532	0.0022784	0.00351475	0.00234128	0.00180767
	3738.25	0.00218	0.0093	0.00263	0.00405	0.00392	0.00278	0.00320312	0.00359822	0.00243329	0.00339952	0.00254391	0.0017651
	3738.01	0.00217	0.00929	0.00262	0.00403	0.00391	0.00279	0.0030212	0.00358238	0.00265406	0.00326286	0.00272074	0.0017498
	3737.77	0.00217	0.00928	0.00261	0.00401	0.00389	0.0028	0.00281553	0.00357012	0.00292359	0.00310833	0.00286767	0.00176522
	3737.53	0.00216	0.00927	0.00261	0.00399	0.00387	0.00281	0.00256907	0.0036	0.00323589	0.0029457	0.00299944	0.00183096
	3737.28	0.00215	0.00926	0.0026	0.00397	0.00386	0.00282	0.00227019	0.00371623	0.00359298	0.00279236	0.00314162	0.00197441
	3737.04	0.00214	0.00925	0.00259	0.00395	0.00384	0.00283	0.00192299	0.00395722	0.00400204	0.00267385	0.00332445	0.00222465
	3736.8	0.00213	0.00924	0.00258	0.00393	0.00382	0.00285	0.00156116	0.00434691	0.0044637	0.00261978	0.0035703	0.00259477
	3736.56	0.00212	0.00923	0.00257	0.00391	0.0038	0.00286	0.00124712	0.00489071	0.004965	0.00265955	0.00388849	0.00307117
	3736.32	0.00211	0.00921	0.00256	0.00389	0.00378	0.00287	0.00105556	0.00557891	0.00548058	0.00280806	0.0042665	0.00361142
	3736.08	0.0021	0.0092	0.00255	0.00387	0.00375	0.00288	0.00104489	0.00639602	0.00598009	0.00306172	0.00467068	0.00416156
	3735.84	0.00208	0.00919	0.00254	0.00384	0.00373	0.00289	0.00124294	0.00732056	0.0064351	0.00339938	0.00505116	0.00467554
	3735.6	0.00207	0.00917	0.00253	0.00382	0.00371	0.0029	0.00164344	0.00829952	0.00681314	0.00378543	0.0053389	0.00512268
	3735.36	0.00206	0.00916	0.00252	0.00379	0.00368	0.00291	0.00220246	0.009207	0.00706703	0.00416674	0.00545702	0.00546929
	3735.12	0.00205	0.00915	0.0025	0.00377	0.00366	0.00292	0.00283486	0.00982159	0.00713598	0.00446953	0.00533371	0.00566894
	3734.87	0.00204	0.00913	0.00249	0.00374	0.00363	0.00293	0.00341292	0.00990072	0.00697919	0.00462275	0.00496063	0.00566879
	3734.63	0.00203	0.00911	0.00248	0.00371	0.00361	0.00294	0.00382822	0.0093475	0.00662528	0.00461249	0.00442574	0.00545278
	3734.39	0.00201	0.0091	0.00246	0.00369	0.00358	0.00295	0.00405461	0.00830085	0.00617207	0.00449623	0.00387848	0.00506392
	3734.15	0.002	0.00908	0.00245	0.00366	0.00355	0.00296	0.00414148	0.0070382	0.00573435	0.00435663	0.00344301	0.00458802
	3733.91	0.00199	0.00906	0.00244	0.00363	0.00353	0.00297	0.0041482	0.00580725	0.00539386	0.00425004	0.0031751	0.00410981
	3733.67	0.00198	0.00905	0.00242	0.0036	0.0035	0.00298	0.00411245	0.00475589	0.00518851	0.00420493	0.00307475	0.00369287
	3733.43	0.00196	0.00903	0.00241	0.00357	0.00347	0.00299	0.00404734	0.00394689	0.00512965	0.00423333	0.00311856	0.00338422
	3733.19	0.00195	0.00901	0.00239	0.00354	0.00344	0.00299	0.0039504	0.00340176	0.00521228	0.00434094	0.00327222	0.00322414
	3732.95	0.00194	0.00899	0.00237	0.00351	0.00341	0.003	0.00381327	0.0031195	0.0054185	0.00452661	0.0034903	0.00325278
	3732.7	0.00192	0.00898	0.00236	0.00348	0.00338	0.00301	0.00363389	0.0030774	0.00569844	0.00477464	0.00370594	0.00348945
	3732.46	0.00191	0.00896	0.00234	0.00345	0.00335	0.00302	0.00343406	0.00320775	0.00595926	0.00503614	0.00382825	0.00389724
	3732.22	0.00189	0.00894	0.00233	0.00341	0.00332	0.00302	0.00326677	0.00338154	0.00607612	0.00522987	0.00376689	0.00435049
	3731.98	0.00188	0.00892	0.00231	0.00338	0.00329	0.00303	0.00319954	0.00344776	0.00595733	0.00528018	0.00349632	0.00466486
	3731.74	0.00187	0.0089	0.00229	0.00335	0.00326	0.00303	0.00326433	0.00331512	0.00561178	0.00518121	0.00308537	0.00470998
	3731.5	0.00185	0.00888	0.00227	0.00331	0.00323	0.00304	0.00343694	0.00299894	0.00513779	0.00499611	0.00264978	0.00448586
	3731.26	0.00184	0.00886	0.00226	0.00328	0.00319	0.00304	0.00366702	0.00257846	0.0046446	0.00480425	0.002278	0.00408975
	3731.02	0.00182	0.00884	0.00224	0.00325	0.00316	0.00305	0.00391013	0.00213429	0.00420249	0.00465722	0.00200306	0.00363806
	3730.78	0.00181	0.00882	0.00222	0.00321	0.00313	0.00305	0.00413728	0.00171763	0.00383514	0.0045738	0.00181573	0.00321538
	3730.53	0.0018	0.0088	0.0022	0.00318	0.0031	0.00305	0.00433107	0.00135265	0.00353689	0.00455188	0.0016893	0.00286557
	3730.29	0.00178	0.00878	0.00219	0.00315	0.00307	0.00306	0.00447888	0.00104945	0.00329116	0.0045751	0.00159418	0.00260225
	3730.05	0.00177	0.00876	0.00217	0.00311	0.00303	0.00306	0.00457009	0.00080971	0.00308027	0.00461909	0.00150717	0.00241938
	3729.81	0.00175	0.00874	0.00215	0.00308	0.003	0.00306	0.00459624	0.00063321	0.00289208	0.00465698	0.00141862	0.00230216
	3729.57	0.00174	0.00872	0.00213	0.00304	0.00297	0.00306	0.0045551	0.00051833	0.00272149	0.00466244	0.00133238	0.0022351
	3729.33	0.00173	0.0087	0.00211	0.00301	0.00294	0.00306	0.00445046	0.0004617	0.0025687	0.0046158	0.00126322	0.0022083
	3729.09	0.00171	0.00868	0.0021	0.00297	0.0029	0.00306	0.00429417	0.00045517	0.00243934	0.00450696	0.00123308	0.00221924
	3728.85	0.0017	0.00866	0.00208	0.00294	0.00287	0.00306	0.00410523	0.0004883	0.00233655	0.00433919	0.00126179	0.00226857
	3728.61	0.00168	0.00865	0.00206	0.0029	0.00284	0.00305	0.00390566	0.00055135	0.00226435	0.00412637	0.00136084	0.00235547
	3728.37	0.00167	0.00863	0.00204	0.00287	0.00281	0.00305	0.00371603	0.00064002	0.00222531	0.00389296	0.00152951	0.00247577
	3728.12	0.00166	0.00861	0.00203	0.00284	0.00278	0.00305	0.00355416	0.00076195	0.00222407	0.00366902	0.00175386	0.00262101
	3727.88	0.00164	0.00859	0.00201	0.0028	0.00275	0.00304	0.0034344	0.00093741	0.00227203	0.00349006	0.00201186	0.00278356
	3727.64	0.00163	0.00857	0.00199	0.00277	0.00271	0.00304	0.00336972	0.00119962	0.00238502	0.00339318	0.00227242	0.00295601
	3727.4	0.00162	0.00855	0.00197	0.00273	0.00268	0.00304	0.00337376	0.00158494	0.00257945	0.00341212	0.00250115	0.00313401
	3727.16	0.0016	0.00853	0.00196	0.0027	0.00265	0.00303	0.00345877	0.00211787	0.00286311	0.00356639	0.00266284	0.00331018
	3726.92	0.00159	0.00851	0.00194	0.00267	0.00262	0.00302	0.00363079	0.00279229	0.0032207	0.00384646	0.00273591	0.00347153
	3726.68	0.00158	0.00849	0.00192	0.00263	0.00259	0.00302	0.00387939	0.00355816	0.00360734	0.00420168	0.00271856	0.0035919
	3726.44	0.00157	0.00847	0.00191	0.0026	0.00256	0.00301	0.00417106	0.00432877	0.00395743	0.00454694	0.00263923	0.00364125
	3726.2	0.00155	0.00845	0.00189	0.00257	0.00254	0.003	0.00445948	0.00500971	0.004207	0.00479513	0.00254065	0.00359575
	3725.95	0.00154	0.00843	0.00188	0.00254	0.00251	0.003	0.00469516	0.00552477	0.00431751	0.00488665	0.00246511	0.00345181
	3725.71	0.00153	0.00841	0.00186	0.00251	0.00248	0.00299	0.00484169	0.00582935	0.00428342	0.00480557	0.00243342	0.00323024
	3725.47	0.00152	0.0084	0.00185	0.00247	0.00245	0.00298	0.00488186	0.00590375	0.00412671	0.00457647	0.00243716	0.00297336
	3725.23	0.00151	0.00838	0.00183	0.00244	0.00243	0.00297	0.00481785	0.00574674	0.00388747	0.00424884	0.00244588	0.00273579
	3724.99	0.0015	0.00836	0.00182	0.00241	0.0024	0.00296	0.00467467	0.00537817	0.0036136	0.00388884	0.00241999	0.00257027
	3724.75	0.00149	0.00834	0.0018	0.00238	0.00237	0.00295	0.0044938	0.0048447	0.00335323	0.00355926	0.00232957	0.00251099
	3724.51	0.00148	0.00832	0.00179	0.00235	0.00235	0.00294	0.00432092	0.0042242	0.00314863	0.00330542	0.00216842	0.00256653
	3724.27	0.00147	0.00831	0.00177	0.00232	0.00232	0.00293	0.00419657	0.00361517	0.00303108	0.00314523	0.00196076	0.00271814
	3724.03	0.00146	0.00829	0.00176	0.0023	0.0023	0.00292	0.00414398	0.00311943	0.00301839	0.00306892	0.00175274	0.00293182
	3723.79	0.00145	0.00827	0.00175	0.00227	0.00228	0.0029	0.00416835	0.00282296	0.00311801	0.00305194	0.0015973	0.00317191
	3723.54	0.00144	0.00825	0.00174	0.00224	0.00225	0.00289	0.00426228	0.00278897	0.00332796	0.00306319	0.0015411	0.00341298
	3723.3	0.00143	0.00824	0.00173	0.00222	0.00223	0.00288	0.00440628	0.00304727	0.00363459	0.00307459	0.00161344	0.00363709
	3723.06	0.00142	0.00822	0.00171	0.00219	0.00221	0.00287	0.0045713	0.00358384	0.00400528	0.00306631	0.00181646	0.00383258
	3722.82	0.00142	0.0082	0.0017	0.00216	0.00219	0.00285	0.00471803	0.00431511	0.00437692	0.00303171	0.00211578	0.00397956
	3722.58	0.00141	0.00819	0.00169	0.00214	0.00217	0.00284	0.00479935	0.00507395	0.00465683	0.00298242	0.00243464	0.00404952
	3722.34	0.0014	0.00817	0.00168	0.00211	0.00215	0.00283	0.00478251	0.00563522	0.00474591	0.00294922	0.00267205	0.00400637
	3722.1	0.00139	0.00815	0.00167	0.00209	0.00213	0.00282	0.00467219	0.00580606	0.0045898	0.00296852	0.0027478	0.00383016
	3721.86	0.00139	0.00814	0.00167	0.00207	0.00212	0.0028	0.00451649	0.00552559	0.0042153	0.00305967	0.00264631	0.00353194
	3721.62	0.00138	0.00812	0.00166	0.00205	0.0021	0.00279	0.00437631	0.0048881	0.0037172	0.00321375	0.0024209	0.00315675
	3721.37	0.00138	0.00811	0.00165	0.00202	0.00208	0.00277	0.00429752	0.00406884	0.00320573	0.00340594	0.00215269	0.002764
	3721.13	0.00137	0.00809	0.00164	0.002	0.00207	0.00276	0.00429628	0.00323585	0.00276411	0.00360852	0.00191366	0.00240564
	3720.89	0.00137	0.00807	0.00163	0.00198	0.00205	0.00275	0.00436713	0.00250505	0.00243418	0.00379949	0.00175	0.00211698
	3720.65	0.00136	0.00806	0.00163	0.00196	0.00204	0.00273	0.00449187	0.00193714	0.00222367	0.00396224	0.00168251	0.00191704
	3720.41	0.00136	0.00804	0.00162	0.00194	0.00203	0.00272	0.00464764	0.00155349	0.00212047	0.00408505	0.00171888	0.00181089
	3720.17	0.00135	0.00803	0.00162	0.00193	0.00201	0.00271	0.00480968	0.0013502	0.00210036	0.004159	0.00185796	0.00179391
	3719.93	0.00135	0.00801	0.00161	0.00191	0.002	0.00269	0.00495398	0.00130542	0.00213432	0.00417874	0.00209106	0.0018502
	3719.69	0.00135	0.008	0.00161	0.00189	0.00199	0.00268	0.00506307	0.00138308	0.00219334	0.00414552	0.00239621	0.00195888
	3719.45	0.00134	0.00798	0.0016	0.00187	0.00198	0.00267	0.00513101	0.00153263	0.00225342	0.00407063	0.00273295	0.00209227
	3719.2	0.00134	0.00796	0.0016	0.00186	0.00197	0.00265	0.00516614	0.00169534	0.0023012	0.00397761	0.00303894	0.00222534
	3718.96	0.00134	0.00795	0.0016	0.00184	0.00196	0.00264	0.0051885	0.00181598	0.00233437	0.00389734	0.00324631	0.00233369
	3718.72	0.00134	0.00793	0.00159	0.00183	0.00195	0.00263	0.00521793	0.00185911	0.0023627	0.00385641	0.00330364	0.00240592
	3718.48	0.00134	0.00792	0.00159	0.00181	0.00195	0.00261	0.00525978	0.00182209	0.00240211	0.00386578	0.00319979	0.00244042
	3718.24	0.00134	0.0079	0.00159	0.0018	0.00194	0.0026	0.00529939	0.00172939	0.00246434	0.00391871	0.00296702	0.00244194
	3718	0.00133	0.00788	0.00159	0.00179	0.00193	0.00259	0.00531115	0.00161817	0.0025548	0.00399875	0.00266451	0.00241763
	3717.76	0.00133	0.00787	0.00159	0.00178	0.00193	0.00258	0.00527064	0.00152233	0.00266701	0.00408953	0.00235602	0.00237061
	3717.52	0.00133	0.00785	0.00159	0.00176	0.00192	0.00257	0.00516463	0.00146373	0.00278842	0.00417885	0.00209202	0.00230209
	3717.28	0.00133	0.00784	0.00159	0.00175	0.00192	0.00255	0.00499804	0.00144854	0.00289979	0.00426246	0.00190122	0.00221074
	3717.04	0.00133	0.00782	0.00158	0.00174	0.00191	0.00254	0.00479279	0.00146829	0.00298138	0.0043411	0.00179088	0.00209429
	3716.79	0.00133	0.0078	0.00159	0.00173	0.00191	0.00253	0.00458369	0.00150619	0.00301606	0.00441762	0.00175048	0.00195463
	3716.55	0.00133	0.00779	0.00159	0.00172	0.00191	0.00252	0.00440861	0.00154394	0.00299457	0.00449472	0.00176044	0.00179785
	3716.31	0.00133	0.00777	0.00159	0.00171	0.0019	0.00251	0.00429532	0.00156679	0.00291725	0.00457049	0.00180109	0.00163822
	3716.07	0.00133	0.00775	0.00159	0.0017	0.0019	0.0025	0.00425293	0.00156831	0.00279405	0.00463873	0.00186019	0.00149355
	3715.83	0.00133	0.00773	0.00159	0.0017	0.0019	0.00249	0.00426924	0.00155131	0.0026414	0.00468855	0.00193223	0.00138793
	3715.59	0.00134	0.00772	0.00159	0.00169	0.0019	0.00248	0.00431717	0.00152191	0.00247828	0.00470846	0.00201551	0.00134474
	3715.35	0.00134	0.0077	0.00159	0.00168	0.0019	0.00248	0.00436366	0.00148768	0.00232151	0.00469022	0.0021043	0.00138214
	3715.11	0.00134	0.00768	0.00159	0.00167	0.0019	0.00247	0.00438332	0.00145126	0.00218359	0.00463353	0.00218446	0.00150572
	3714.87	0.00134	0.00766	0.0016	0.00167	0.0019	0.00246	0.00436728	0.00141267	0.00207348	0.00454894	0.0022342	0.00170543
	3714.62	0.00134	0.00764	0.0016	0.00166	0.0019	0.00245	0.00432225	0.00136848	0.00199669	0.00445297	0.00223151	0.00195642
	3714.38	0.00134	0.00762	0.0016	0.00165	0.0019	0.00245	0.00426516	0.00131947	0.00195826	0.00436617	0.0021662	0.00222699
	3714.14	0.00134	0.0076	0.0016	0.00165	0.0019	0.00244	0.00420814	0.00127311	0.00196631	0.00430223	0.00204541	0.00248918
	3713.9	0.00134	0.00758	0.00161	0.00164	0.0019	0.00243	0.00415162	0.00124542	0.00203134	0.00426723	0.00188969	0.00272807
	3713.66	0.00135	0.00756	0.00161	0.00164	0.0019	0.00243	0.00407999	0.00126328	0.00217026	0.00425809	0.00172791	0.00294509
	3713.42	0.00135	0.00754	0.00161	0.00163	0.0019	0.00242	0.0039667	0.00136256	0.0024055	0.00426808	0.00159049	0.00315506
	3713.18	0.00135	0.00752	0.00162	0.00163	0.0019	0.00242	0.00377953	0.001588	0.0027635	0.00429041	0.00150422	0.00337989
	3712.94	0.00135	0.00749	0.00162	0.00162	0.0019	0.00242	0.00349	0.00198773	0.00326971	0.00431924	0.0014916	0.00364059
	3712.7	0.00135	0.00747	0.00162	0.00162	0.0019	0.00241	0.00309797	0.00259275	0.00392607	0.00435003	0.00156618	0.00394353
	3712.45	0.00135	0.00745	0.00163	0.00161	0.00191	0.00241	0.00266532	0.00336588	0.00467506	0.00437914	0.00172602	0.00426064
	3712.21	0.00135	0.00743	0.00163	0.00161	0.00191	0.00241	0.00233502	0.00415221	0.00537223	0.00439628	0.00193658	0.00451823
	3711.97	0.00136	0.0074	0.00163	0.00161	0.00191	0.00241	0.00226159	0.00471175	0.00583304	0.00438582	0.00213261	0.00463128
	3711.73	0.00136	0.00738	0.00164	0.0016	0.00191	0.0024	0.00245985	0.00488155	0.00596473	0.00433236	0.00225368	0.00457069
	3711.49	0.00136	0.00735	0.00164	0.0016	0.00191	0.0024	0.00279486	0.00468734	0.00582737	0.00423484	0.00228166	0.00438846
	3711.25	0.00136	0.00733	0.00164	0.00159	0.00191	0.0024	0.00311146	0.00428004	0.00555526	0.00410078	0.0022337	0.00416561
	3711.01	0.00136	0.0073	0.00164	0.00159	0.00192	0.0024	0.00332936	0.00381394	0.00526282	0.00394107	0.00213699	0.0039685
	3710.77	0.00136	0.00727	0.00165	0.00159	0.00192	0.0024	0.00343399	0.00339652	0.00501301	0.00376319	0.00201503	0.0038328
	3710.53	0.00136	0.00725	0.00165	0.00158	0.00192	0.0024	0.00344656	0.00309205	0.00482651	0.00357638	0.00189017	0.00377449
	3710.29	0.00136	0.00722	0.00165	0.00158	0.00192	0.00241	0.00340449	0.00293881	0.00469878	0.00339183	0.00178517	0.0037947
	3710.04	0.00136	0.00719	0.00165	0.00158	0.00192	0.00241	0.00335803	0.00295113	0.00460155	0.00323	0.00172283	0.00387839
	3709.8	0.00136	0.00716	0.00166	0.00157	0.00192	0.00241	0.00336318	0.00310955	0.00449045	0.00311623	0.0017232	0.00398781
	3709.56	0.00136	0.00713	0.00166	0.00157	0.00192	0.00241	0.00346697	0.00334752	0.00430912	0.00307884	0.00178448	0.00405963
	3709.32	0.00136	0.0071	0.00166	0.00157	0.00193	0.00241	0.00368003	0.00356033	0.00401433	0.00313057	0.00187338	0.00402337
	3709.08	0.00136	0.00707	0.00166	0.00156	0.00193	0.00242	0.00396437	0.00364906	0.00360559	0.00325558	0.00193327	0.00384027
	3708.84	0.00135	0.00704	0.00166	0.00156	0.00193	0.00242	0.00425858	0.00357378	0.00312841	0.00341724	0.0019169	0.00352838
	3708.6	0.00135	0.00701	0.00166	0.00156	0.00193	0.00243	0.00451047	0.00336177	0.00265012	0.00357607	0.00181186	0.00314998
	3708.36	0.00135	0.00698	0.00166	0.00155	0.00193	0.00243	0.0046966	0.00307556	0.00223094	0.00370743	0.0016406	0.00277802
	3708.12	0.00135	0.00695	0.00166	0.00155	0.00193	0.00243	0.00481533	0.002773	0.00191165	0.00379702	0.00144188	0.0024741
	3707.87	0.00135	0.00692	0.00166	0.00154	0.00193	0.00244	0.00487163	0.00249352	0.00171358	0.00383968	0.00125409	0.00227534
	3707.63	0.00135	0.00688	0.00166	0.00154	0.00193	0.00245	0.00487125	0.0022531	0.00164239	0.0038335	0.0011053	0.002196
	3707.39	0.00134	0.00685	0.00166	0.00154	0.00193	0.00245	0.00481796	0.00205209	0.00168829	0.00378164	0.00100983	0.00222242
	3707.15	0.00134	0.00682	0.00166	0.00153	0.00193	0.00246	0.00471847	0.00188163	0.00182693	0.0036951	0.00096759	0.00231907
	3706.91	0.00134	0.00678	0.00166	0.00153	0.00193	0.00246	0.00458602	0.00173144	0.00202084	0.00359519	0.00096883	0.00243116
	3706.67	0.00133	0.00675	0.00166	0.00153	0.00192	0.00247	0.00444513	0.00159735	0.00222189	0.00351248	0.00100396	0.00249995
	3706.43	0.00133	0.00671	0.00166	0.00152	0.00192	0.00248	0.00432721	0.00148146	0.00238168	0.00348222	0.00106902	0.00247836
	3706.19	0.00133	0.00668	0.00166	0.00152	0.00192	0.00248	0.00426465	0.0013914	0.00246079	0.00353244	0.0011704	0.00235015
	3705.95	0.00132	0.00664	0.00166	0.00152	0.00192	0.00249	0.00428092	0.00133429	0.00244081	0.00367609	0.00131889	0.00213875
	3705.7	0.00132	0.00661	0.00166	0.00151	0.00192	0.0025	0.00437975	0.00130982	0.00232485	0.00390365	0.00152246	0.00189895
	3705.46	0.00132	0.00657	0.00165	0.00151	0.00192	0.00251	0.0045428	0.00130775	0.00213884	0.00418595	0.0017739	0.00169968
	3705.22	0.00131	0.00653	0.00165	0.00151	0.00192	0.00252	0.00473324	0.00131027	0.00192191	0.00447996	0.00204785	0.00159978
	3704.98	0.00131	0.0065	0.00165	0.0015	0.00191	0.00253	0.00490835	0.00129893	0.00171925	0.00474289	0.00230478	0.00163068
	3704.74	0.0013	0.00646	0.00164	0.0015	0.00191	0.00253	0.00503067	0.00126257	0.00157019	0.0049401	0.00250371	0.00178766
	3704.5	0.0013	0.00643	0.00164	0.0015	0.00191	0.00254	0.00507661	0.00120271	0.00150181	0.00505158	0.00261482	0.00203406
	3704.26	0.0013	0.00639	0.00164	0.0015	0.00191	0.00255	0.00504195	0.00113564	0.00152573	0.00507164	0.00262958	0.00231869
	3704.02	0.00129	0.00635	0.00164	0.00149	0.00191	0.00256	0.00493709	0.00108808	0.00163923	0.00500393	0.00256295	0.00259376
	3703.78	0.00129	0.00632	0.00163	0.00149	0.0019	0.00257	0.00478131	0.00109085	0.00183161	0.0048571	0.00244359	0.00283185
	3703.54	0.00128	0.00628	0.00163	0.00149	0.0019	0.00258	0.00459293	0.00117171	0.00208846	0.00463839	0.00230568	0.00302861
	3703.29	0.00128	0.00624	0.00162	0.00149	0.0019	0.00259	0.00438681	0.00135147	0.00240001	0.004354	0.00217664	0.00320331
	3703.05	0.00127	0.00621	0.00162	0.00149	0.0019	0.0026	0.00417095	0.00164078	0.00276227	0.00400894	0.00207538	0.00338594
	3702.81	0.00127	0.00617	0.00162	0.00148	0.00189	0.00261	0.00395276	0.00203708	0.00317156	0.00361529	0.00201322	0.00360472
	3702.57	0.00126	0.00613	0.00161	0.00148	0.00189	0.00262	0.00374398	0.00251671	0.00361603	0.00320149	0.00200101	0.00386985
	3702.33	0.00126	0.0061	0.00161	0.00148	0.00189	0.00263	0.00356867	0.00302525	0.00405891	0.00282151	0.00204993	0.00415853
	3702.09	0.00125	0.00606	0.0016	0.00148	0.00189	0.00265	0.00346316	0.00347383	0.0044321	0.00255363	0.00217239	0.00441092
	3701.85	0.00125	0.00603	0.0016	0.00148	0.00189	0.00266	0.00346231	0.00376026	0.00464768	0.00247265	0.00236717	0.00454398
	3701.61	0.00124	0.00599	0.00159	0.00148	0.00189	0.00267	0.00357058	0.00381592	0.00464008	0.00259911	0.002612	0.00449287
	3701.37	0.00124	0.00596	0.00159	0.00148	0.00189	0.00268	0.00375147	0.00365045	0.00440927	0.00287543	0.00286236	0.00425517
	3701.12	0.00123	0.00592	0.00158	0.00148	0.00188	0.00269	0.00394855	0.00334284	0.0040216	0.00320238	0.00307455	0.00388821
	3700.88	0.00123	0.00589	0.00158	0.00149	0.00188	0.0027	0.00411686	0.00299102	0.00356957	0.00349966	0.00322402	0.00347603
	3700.64	0.00123	0.00586	0.00157	0.00149	0.00188	0.00271	0.00423923	0.00266576	0.00312894	0.00373233	0.00330884	0.00308412
	3700.4	0.00122	0.00582	0.00157	0.00149	0.00188	0.00273	0.00432078	0.00239881	0.00274316	0.00390226	0.00334157	0.00275191
	3700.16	0.00122	0.00579	0.00157	0.00149	0.00189	0.00274	0.00437961	0.00218641	0.00242757	0.00402957	0.00334005	0.00249482
	3699.92	0.00122	0.00576	0.00156	0.0015	0.00189	0.00275	0.00443858	0.00200663	0.00217841	0.00413789	0.00331835	0.00231287
	3699.68	0.00121	0.00573	0.00156	0.0015	0.00189	0.00276	0.00451789	0.00183157	0.00198408	0.00424533	0.00328188	0.00219843
	3699.44	0.00121	0.0057	0.00155	0.00151	0.00189	0.00277	0.00463187	0.0016406	0.0018349	0.00436136	0.003224	0.00214171
	3699.2	0.00121	0.00567	0.00155	0.00151	0.00189	0.00279	0.00478382	0.00143209	0.0017289	0.00448364	0.00312982	0.00213288
	3698.95	0.00121	0.00564	0.00155	0.00152	0.00189	0.0028	0.00496543	0.00122433	0.00167449	0.00460309	0.00298393	0.00216507
	3698.71	0.0012	0.00561	0.00154	0.00153	0.0019	0.00281	0.00515918	0.00105259	0.0016854	0.00470754	0.00278021	0.00223086
	3698.47	0.0012	0.00559	0.00154	0.00153	0.0019	0.00283	0.00534527	0.00095218	0.0017704	0.00478892	0.00252843	0.00232194
	3698.23	0.0012	0.00556	0.00153	0.00154	0.00191	0.00284	0.00550505	0.00094616	0.00192533	0.00484331	0.00225657	0.00242826
	3697.99	0.0012	0.00554	0.00153	0.00155	0.00191	0.00285	0.00562557	0.00103788	0.00212338	0.00487252	0.00200432	0.00253465
	3697.75	0.0012	0.00551	0.00153	0.00156	0.00192	0.00286	0.00569687	0.00120855	0.00231922	0.0048788	0.00181224	0.00262125
	3697.51	0.0012	0.00549	0.00153	0.00157	0.00192	0.00288	0.00571335	0.00142632	0.00245748	0.00486275	0.00171103	0.00266977
	3697.27	0.0012	0.00547	0.00152	0.00158	0.00193	0.00289	0.0056716	0.00165508	0.0024883	0.0048219	0.00171279	0.00266514
	3697.03	0.0012	0.00544	0.00152	0.0016	0.00194	0.0029	0.00557035	0.00186513	0.00238483	0.00475079	0.00180819	0.00260322
	3696.79	0.0012	0.00542	0.00152	0.00161	0.00195	0.00292	0.00541012	0.00203863	0.00215125	0.00464371	0.00196955	0.00248914
	3696.54	0.0012	0.00541	0.00152	0.00162	0.00196	0.00293	0.00519931	0.00216812	0.00182639	0.00449863	0.00216209	0.00234134
	3696.3	0.00121	0.00539	0.00152	0.00164	0.00197	0.00294	0.00495056	0.00225042	0.00146795	0.00431876	0.00235107	0.00218115
	3696.06	0.00121	0.00537	0.00152	0.00165	0.00198	0.00296	0.00468421	0.00228223	0.00113722	0.00411425	0.00251277	0.00202985
	3695.82	0.00121	0.00535	0.00152	0.00167	0.00199	0.00297	0.00442497	0.00225836	0.00088013	0.00390153	0.00263699	0.00189995
	3695.58	0.00122	0.00534	0.00152	0.00168	0.002	0.00299	0.00419879	0.00217401	0.00071772	0.0037016	0.00272573	0.00179504
	3695.34	0.00122	0.00533	0.00152	0.0017	0.00201	0.003	0.00403073	0.00203259	0.00064894	0.00353687	0.00278929	0.00171158
	3695.1	0.00122	0.00531	0.00152	0.00172	0.00203	0.00301	0.00393935	0.0018485	0.00065961	0.00343019	0.00284199	0.00164543
	3694.86	0.00123	0.0053	0.00152	0.00174	0.00204	0.00303	0.00393506	0.00164726	0.00073365	0.00340063	0.00289906	0.00159666
	3694.62	0.00123	0.00529	0.00152	0.00176	0.00206	0.00304	0.00401616	0.00145938	0.00086005	0.00345984	0.00297386	0.00157451
	3694.37	0.00124	0.00528	0.00152	0.00178	0.00207	0.00306	0.00416731	0.0013089	0.00103617	0.00360724	0.0030761	0.00159761
	3694.13	0.00125	0.00528	0.00152	0.0018	0.00209	0.00307	0.00436039	0.00120708	0.00126245	0.00382472	0.00320846	0.00168793
	3693.89	0.00125	0.00527	0.00153	0.00182	0.00211	0.00309	0.00455612	0.00114764	0.00153605	0.00407416	0.00336593	0.00186326
	3693.65	0.00126	0.00526	0.00153	0.00185	0.00213	0.0031	0.00471349	0.00111134	0.00184775	0.00430503	0.00353474	0.00212583
	3693.41	0.00127	0.00526	0.00153	0.00187	0.00215	0.00311	0.00480182	0.00107806	0.00218175	0.00446519	0.00369618	0.00246024
	3693.17	0.00128	0.00526	0.00154	0.00189	0.00217	0.00313	0.00480694	0.00104005	0.00251994	0.00451543	0.00383429	0.00283378
	3692.93	0.00129	0.00525	0.00154	0.00192	0.00219	0.00314	0.00473413	0.00100971	0.00284907	0.0044377	0.00393919	0.00320492
	3692.69	0.00129	0.00525	0.00155	0.00195	0.00221	0.00316	0.00460371	0.00102329	0.00316334	0.00423741	0.0040095	0.00353299
	3692.45	0.0013	0.00526	0.00155	0.00197	0.00223	0.00317	0.00444245	0.0011347	0.00346553	0.00393863	0.00405291	0.00378461
	3692.21	0.00131	0.00526	0.00156	0.002	0.00225	0.00319	0.00427893	0.00141139	0.00376379	0.00358164	0.00408125	0.00394042
	3691.96	0.00132	0.00526	0.00156	0.00203	0.00228	0.0032	0.004139	0.00191612	0.00406477	0.003226	0.00410626	0.00399683
	3691.72	0.00134	0.00526	0.00157	0.00205	0.0023	0.00322	0.00404213	0.00268188	0.00436895	0.00295071	0.00413451	0.00397497
	3691.48	0.00135	0.00527	0.00157	0.00208	0.00233	0.00323	0.0039964	0.00366649	0.00466089	0.00284656	0.00416616	0.00391984
	3691.24	0.00136	0.00528	0.00158	0.00211	0.00235	0.00324	0.00399085	0.00471783	0.00491347	0.00297828	0.00419546	0.00389791
	3691	0.00137	0.00528	0.00159	0.00214	0.00238	0.00326	0.00399681	0.00560539	0.00509397	0.00332872	0.00422225	0.00395566
	3690.76	0.00138	0.00529	0.00159	0.00217	0.0024	0.00327	0.00398323	0.00613757	0.00519006	0.00378288	0.0042594	0.00409603
	3690.52	0.00139	0.0053	0.0016	0.0022	0.00243	0.00329	0.00393482	0.00626227	0.0052148	0.00420041	0.00433209	0.00427669
	3690.28	0.00141	0.00531	0.00161	0.00223	0.00246	0.0033	0.00385622	0.0060586	0.00519587	0.00449635	0.00446884	0.00444228
	3690.04	0.00142	0.00532	0.00162	0.00227	0.00249	0.00332	0.00375841	0.00565879	0.00516059	0.00465404	0.00469168	0.00455409
	3689.79	0.00143	0.00534	0.00163	0.0023	0.00252	0.00333	0.00365323	0.00518649	0.0051272	0.00469408	0.00501411	0.00459586
	3689.55	0.00145	0.00535	0.00163	0.00233	0.00254	0.00334	0.00355284	0.00473993	0.00510765	0.00464565	0.00543829	0.00457108
	3689.31	0.00146	0.00536	0.00164	0.00236	0.00257	0.00336	0.00347551	0.0044062	0.00510717	0.00453728	0.00594454	0.00449495
	3689.07	0.00148	0.00538	0.00165	0.00239	0.0026	0.00337	0.00345696	0.00426886	0.00512073	0.00439919	0.00647074	0.00438844
	3688.83	0.00149	0.00539	0.00166	0.00243	0.00263	0.00339	0.003552	0.00438731	0.00512716	0.00426876	0.00688338	0.00427479
	3688.59	0.0015	0.00541	0.00167	0.00246	0.00266	0.0034	0.00381106	0.00473876	0.00507913	0.00419269	0.00699272	0.00416563
	3688.35	0.00152	0.00543	0.00168	0.00249	0.00269	0.00341	0.00421396	0.00515776	0.00492302	0.0041998	0.0066566	0.00405354
	3688.11	0.00153	0.00545	0.00169	0.00253	0.00273	0.00343	0.00464448	0.00540424	0.00463889	0.00426927	0.00593017	0.00390976
	3687.87	0.00155	0.00547	0.0017	0.00256	0.00276	0.00344	0.00497095	0.00533866	0.0042628	0.00434722	0.00503807	0.0037175
	3687.62	0.00156	0.00549	0.00171	0.00259	0.00279	0.00345	0.00514041	0.00499341	0.00385916	0.00439378	0.00420086	0.00348803
	3687.38	0.00158	0.00551	0.00172	0.00262	0.00282	0.00347	0.00517143	0.00449282	0.00348118	0.00440218	0.00352198	0.00324907
	3687.14	0.00159	0.00553	0.00173	0.00266	0.00285	0.00348	0.00511198	0.00395782	0.00316318	0.00438774	0.0030162	0.00303425
	3686.9	0.00161	0.00555	0.00174	0.00269	0.00288	0.00349	0.00500952	0.00347419	0.00292283	0.004372	0.00265862	0.00286844
	3686.66	0.00162	0.00557	0.00175	0.00272	0.00291	0.0035	0.00490756	0.00308879	0.00276918	0.00437461	0.00242232	0.00277024
	3686.42	0.00164	0.00559	0.00176	0.00275	0.00294	0.00352	0.00484337	0.00281381	0.00269855	0.00441121	0.00228516	0.00274295
	3686.18	0.00165	0.00561	0.00177	0.00278	0.00297	0.00353	0.00484778	0.00263126	0.00269489	0.00448819	0.0022324	0.0027751
	3685.94	0.00166	0.00564	0.00178	0.00282	0.003	0.00354	0.00493855	0.00249973	0.00273043	0.00460257	0.00225149	0.00284313
	3685.7	0.00168	0.00566	0.00179	0.00285	0.00303	0.00355	0.00511739	0.00237086	0.00277194	0.0047411	0.00232942	0.00291672
	3685.46	0.00169	0.00568	0.00181	0.00288	0.00306	0.00356	0.00536633	0.00220654	0.00279181	0.00488326	0.00245223	0.00297233
	3685.21	0.00171	0.0057	0.00182	0.00291	0.00309	0.00357	0.00565242	0.00199495	0.00277659	0.00500678	0.00260555	0.00299746
	3684.97	0.00172	0.00573	0.00183	0.00294	0.00312	0.00358	0.00593187	0.00175621	0.00273	0.00509229	0.00277583	0.00299705
	3684.73	0.00173	0.00575	0.00184	0.00297	0.00315	0.0036	0.00616126	0.0015321	0.00267089	0.00512727	0.00295362	0.00298662
	3684.49	0.00175	0.00578	0.00185	0.00299	0.00318	0.00361	0.00630381	0.00136922	0.00262153	0.00510727	0.00313182	0.00298566
	3684.25	0.00176	0.0058	0.00186	0.00302	0.00321	0.00362	0.00634152	0.00129599	0.00259694	0.00503762	0.00330575	0.00300315
	3684.01	0.00177	0.00582	0.00187	0.00305	0.00324	0.00363	0.00627608	0.00131111	0.00259998	0.00493036	0.00347161	0.00303694
	3683.77	0.00178	0.00585	0.00188	0.00307	0.00327	0.00363	0.00612757	0.00138279	0.00262054	0.00480153	0.00362358	0.00307208
	3683.53	0.0018	0.00587	0.00189	0.0031	0.00329	0.00364	0.00592592	0.0014663	0.00264235	0.00466766	0.00375567	0.00308829
	3683.29	0.00181	0.00589	0.00189	0.00313	0.00332	0.00365	0.00570359	0.00152006	0.00265268	0.00454425	0.00385965	0.00306847
	3683.04	0.00182	0.00592	0.0019	0.00315	0.00334	0.00366	0.0054877	0.00151943	0.00264722	0.00444327	0.00392679	0.00300517
	3682.8	0.00183	0.00594	0.00191	0.00317	0.00337	0.00367	0.00529745	0.00146015	0.00263106	0.00437265	0.00394965	0.00290244
	3682.56	0.00184	0.00596	0.00192	0.0032	0.00339	0.00368	0.00514355	0.00135676	0.00261365	0.00433267	0.00392656	0.00277358
	3682.32	0.00185	0.00598	0.00193	0.00322	0.00342	0.00368	0.00502669	0.00123467	0.00260424	0.00431775	0.00386155	0.00263801
	3682.08	0.00186	0.006	0.00194	0.00324	0.00344	0.00369	0.00494113	0.00112535	0.00260915	0.004315	0.00376789	0.00251852
	3681.84	0.00187	0.00603	0.00195	0.00326	0.00346	0.0037	0.00487616	0.00106052	0.00262935	0.00430914	0.00366504	0.00243465
	3681.6	0.00188	0.00605	0.00195	0.00328	0.00348	0.00371	0.00482191	0.00107302	0.00266457	0.00428866	0.00357465	0.00240426
	3681.36	0.00189	0.00607	0.00196	0.0033	0.0035	0.00371	0.0047729	0.00119436	0.00271716	0.00425182	0.00351406	0.00243868
	3681.12	0.0019	0.00609	0.00197	0.00331	0.00352	0.00372	0.00473207	0.00145374	0.00279296	0.00420717	0.00349198	0.00254443
	3680.87	0.00191	0.00611	0.00198	0.00333	0.00354	0.00372	0.00470919	0.00186894	0.002902	0.00417461	0.00350615	0.00272271
	3680.63	0.00191	0.00613	0.00198	0.00335	0.00356	0.00373	0.00472074	0.00243695	0.00305302	0.00418034	0.00354282	0.00296917
	3680.39	0.00192	0.00614	0.00199	0.00336	0.00357	0.00373	0.00478146	0.00311737	0.00324702	0.00424771	0.00357884	0.00326913
	3680.15	0.00193	0.00616	0.002	0.00337	0.00359	0.00374	0.00490313	0.00382525	0.00347136	0.00439165	0.00358662	0.00359919
	3679.91	0.00193	0.00618	0.002	0.00339	0.00361	0.00374	0.00508294	0.00443901	0.00369968	0.00460493	0.00354429	0.00393209
	3679.67	0.00194	0.0062	0.00201	0.0034	0.00362	0.00375	0.00530434	0.00483535	0.00389652	0.0048568	0.00344663	0.00424015
	3679.43	0.00195	0.00621	0.00201	0.00341	0.00363	0.00375	0.00554084	0.00494128	0.00403422	0.00510089	0.00331366	0.00450761
	3679.19	0.00195	0.00623	0.00202	0.00342	0.00365	0.00375	0.00576791	0.00477568	0.00410451	0.0052962	0.00318613	0.00473215
	3678.95	0.00196	0.00624	0.00202	0.00343	0.00366	0.00376	0.00597564	0.00444877	0.00412749	0.00542425	0.00311096	0.00492583
	3678.71	0.00196	0.00626	0.00203	0.00344	0.00367	0.00376	0.00617019	0.00411105	0.00414037	0.00549551	0.00312537	0.0051032
	3678.46	0.00196	0.00627	0.00203	0.00344	0.00368	0.00376	0.00636436	0.00389349	0.00418393	0.00553266	0.0032471	0.00527406
	3678.22	0.00197	0.00628	0.00203	0.00345	0.00369	0.00376	0.00656751	0.00386982	0.00428864	0.00555728	0.00347769	0.00544063
	3677.98	0.00197	0.0063	0.00204	0.00346	0.00369	0.00376	0.00677941	0.00405285	0.0044735	0.00557827	0.00381016	0.00560003
	3677.74	0.00197	0.00631	0.00204	0.00346	0.0037	0.00377	0.00698918	0.00441254	0.00474495	0.00559136	0.00423676	0.00574861
	3677.5	0.00198	0.00632	0.00205	0.00347	0.00371	0.00377	0.0071741	0.00489696	0.00510296	0.00557941	0.00475388	0.0058835
	3677.26	0.00198	0.00633	0.00205	0.00347	0.00371	0.00377	0.00730412	0.00545567	0.00554159	0.00551692	0.00536034	0.00600868
	3677.02	0.00198	0.00634	0.00205	0.00347	0.00372	0.00377	0.00734261	0.00605495	0.0060533	0.00537432	0.00605609	0.00613632
	3676.78	0.00198	0.00635	0.00205	0.00347	0.00372	0.00377	0.00725247	0.00669472	0.00662783	0.00512625	0.00683476	0.00629191
	3676.54	0.00198	0.00635	0.00206	0.00347	0.00372	0.00377	0.00699715	0.00741944	0.00725029	0.00475583	0.00767327	0.00651311
	3676.29	0.00199	0.00636	0.00206	0.00347	0.00373	0.00377	0.00654848	0.00831109	0.00789869	0.00427002	0.00851581	0.0068538
	3676.05	0.00199	0.00637	0.00206	0.00347	0.00373	0.00377	0.0058953	0.00944952	0.00853167	0.00371611	0.00925347	0.00736506
	3675.81	0.00199	0.00638	0.00206	0.00347	0.00373	0.00377	0.00507823	0.0108018	0.00906709	0.00320959	0.00970855	0.00805515
	3675.57	0.00199	0.00638	0.00206	0.00347	0.00373	0.00377	0.004252	0.0120822	0.00937226	0.00294109	0.00968353	0.00880774
	3675.33	0.00199	0.00639	0.00207	0.00347	0.00373	0.00377	0.00368402	0.0127713	0.00931168	0.00305918	0.00910193	0.0093628
	3675.09	0.00199	0.00639	0.00207	0.00346	0.00372	0.00377	0.00355784	0.0124772	0.00885957	0.00348602	0.0081367	0.00946517
	3674.85	0.00199	0.00639	0.00207	0.00346	0.00372	0.00377	0.00379559	0.0112907	0.00813195	0.00397171	0.00710253	0.00906136
	3674.61	0.00199	0.0064	0.00207	0.00346	0.00372	0.00377	0.00418858	0.00964025	0.00729336	0.00433857	0.00622398	0.00829799
	3674.37	0.00199	0.0064	0.00207	0.00345	0.00372	0.00377	0.0045953	0.00793388	0.00646393	0.0045604	0.0055581	0.00737303
	3674.12	0.00199	0.0064	0.00207	0.00345	0.00371	0.00377	0.00496378	0.00640109	0.00570444	0.00467443	0.00507252	0.00643435
	3673.88	0.00199	0.0064	0.00207	0.00344	0.00371	0.00377	0.00528249	0.00512503	0.00504415	0.00472355	0.00471429	0.00557246
	3673.64	0.00199	0.00641	0.00207	0.00344	0.0037	0.00376	0.00554991	0.00411233	0.0045029	0.00473632	0.00444418	0.00484253
	3673.4	0.00199	0.00641	0.00207	0.00343	0.0037	0.00376	0.00576323	0.00333847	0.0040979	0.00473051	0.00423944	0.00428031
	3673.16	0.00199	0.00641	0.00208	0.00343	0.00369	0.00376	0.00591855	0.00276682	0.00384255	0.00471633	0.00409141	0.00390582
	3672.92	0.00198	0.00641	0.00208	0.00342	0.00369	0.00376	0.00601189	0.00235989	0.0037415	0.00470164	0.00399715	0.00372405
	3672.68	0.00198	0.00641	0.00208	0.00341	0.00368	0.00376	0.00604316	0.00208121	0.00378681	0.00469259	0.00395802	0.00372099
	3672.44	0.00198	0.00641	0.00208	0.00341	0.00367	0.00376	0.00601823	0.00190352	0.00395876	0.00469741	0.0039735	0.00387049
	3672.2	0.00198	0.00641	0.00208	0.0034	0.00367	0.00376	0.00594775	0.00181381	0.00423294	0.00472505	0.00404382	0.00414354
	3671.96	0.00198	0.0064	0.00208	0.00339	0.00366	0.00375	0.00584764	0.00182064	0.00458462	0.00478925	0.00416892	0.00451911
	3671.71	0.00198	0.0064	0.00208	0.00339	0.00365	0.00375	0.00573782	0.00195679	0.00499449	0.00490725	0.00434799	0.00499067
	3671.47	0.00198	0.0064	0.00208	0.00338	0.00365	0.00375	0.00564252	0.00227961	0.00544153	0.00509866	0.00457565	0.00556057
	3671.23	0.00198	0.0064	0.00209	0.00337	0.00364	0.00375	0.00558945	0.00284657	0.00589187	0.00537231	0.00482992	0.00621949
	3670.99	0.00198	0.0064	0.00209	0.00337	0.00363	0.00375	0.00560044	0.00366389	0.00628203	0.00570108	0.00506318	0.00690672
	3670.75	0.00198	0.0064	0.00209	0.00336	0.00362	0.00375	0.00567004	0.00462336	0.00652615	0.00599825	0.00520867	0.00748871
	3670.51	0.00199	0.00639	0.00209	0.00336	0.00362	0.00375	0.00575365	0.00551497	0.00656553	0.00614658	0.00521731	0.0078139
	3670.27	0.00199	0.00639	0.00209	0.00335	0.00361	0.00375	0.00579401	0.00615157	0.00641781	0.00607814	0.00509918	0.0078162
	3670.03	0.00199	0.00639	0.0021	0.00334	0.0036	0.00375	0.00576019	0.00648005	0.0061635	0.00581962	0.00491131	0.00755783
	3669.79	0.00199	0.00639	0.0021	0.00334	0.00359	0.00375	0.00566223	0.00656206	0.005891	0.00545009	0.0047127	0.00716943
	3669.54	0.00199	0.00638	0.0021	0.00333	0.00359	0.00374	0.00553343	0.00648931	0.00566004	0.00505418	0.0045359	0.00677861
	3669.3	0.00199	0.00638	0.0021	0.00333	0.00358	0.00374	0.00542002	0.00632525	0.00549401	0.00470872	0.00438612	0.00648015
	3669.06	0.002	0.00638	0.00211	0.00333	0.00357	0.00374	0.00536724	0.00609398	0.00538465	0.00448456	0.00424926	0.0063261
	3668.82	0.002	0.00638	0.00211	0.00332	0.00357	0.00374	0.00540792	0.00578659	0.00529441	0.00443449	0.0041035	0.00631015
	3668.58	0.002	0.00638	0.00211	0.00332	0.00356	0.00374	0.00554624	0.00539177	0.00517135	0.00456889	0.00393534	0.00636975
	3668.34	0.002	0.00638	0.00212	0.00332	0.00356	0.00374	0.00574795	0.00491629	0.00497306	0.0048399	0.00375234	0.00640813
	3668.1	0.00201	0.00637	0.00212	0.00331	0.00355	0.00374	0.00596019	0.00439353	0.00468758	0.00516711	0.00358155	0.00634428
	3667.86	0.00201	0.00637	0.00213	0.00331	0.00355	0.00374	0.00613953	0.00386961	0.00433633	0.00547468	0.00345671	0.00614592
	3667.62	0.00202	0.00637	0.00213	0.00331	0.00354	0.00375	0.0062617	0.00338482	0.00395821	0.00571549	0.0034012	0.00583036
	3667.38	0.00202	0.00637	0.00214	0.00331	0.00354	0.00375	0.00632348	0.00296651	0.00359652	0.00586974	0.00342329	0.00544686
	3667.13	0.00203	0.00637	0.00214	0.00331	0.00353	0.00375	0.00633538	0.00262526	0.00328489	0.0059376	0.00351314	0.00505316
	3666.89	0.00203	0.00637	0.00215	0.00331	0.00353	0.00375	0.0063149	0.00235941	0.0030444	0.00592928	0.00364318	0.00470081
	3666.65	0.00204	0.00637	0.00215	0.00331	0.00353	0.00375	0.00628231	0.00215626	0.00288066	0.00586086	0.00377476	0.00442842
	3666.41	0.00204	0.00637	0.00216	0.00331	0.00353	0.00375	0.00625631	0.00199803	0.00278245	0.00575247	0.00386757	0.00425178
	3666.17	0.00205	0.00637	0.00216	0.00332	0.00353	0.00375	0.00624937	0.00186811	0.00272802	0.00562447	0.00389461	0.00416836
	3665.93	0.00206	0.00638	0.00217	0.00332	0.00353	0.00376	0.00626325	0.00175821	0.00269277	0.00549505	0.00385275	0.00416036
	3665.69	0.00206	0.00638	0.00218	0.00332	0.00353	0.00376	0.00629105	0.00167392	0.00266084	0.00537557	0.00376331	0.004206
	3665.45	0.00207	0.00638	0.00218	0.00333	0.00353	0.00376	0.00631948	0.00163191	0.00263072	0.00527104	0.003664	0.00428989
	3665.21	0.00208	0.00638	0.00219	0.00333	0.00353	0.00376	0.00633826	0.00165277	0.00261466	0.0051806	0.00359204	0.00440357
	3664.96	0.00209	0.00639	0.0022	0.00334	0.00353	0.00376	0.00634335	0.00174921	0.0026289	0.00510209	0.00356773	0.00454125
	3664.72	0.0021	0.00639	0.00221	0.00334	0.00353	0.00377	0.00633958	0.00191671	0.00268444	0.00503412	0.00358947	0.00469105
	3664.48	0.00211	0.00639	0.00221	0.00335	0.00353	0.00377	0.00634103	0.00212993	0.00277887	0.00497878	0.00363459	0.00483024
	3664.24	0.00212	0.0064	0.00222	0.00336	0.00354	0.00377	0.00636051	0.00234861	0.0028953	0.00494111	0.00367416	0.00492853
	3664	0.00213	0.0064	0.00223	0.00336	0.00354	0.00378	0.00640546	0.00252875	0.00300917	0.00492688	0.00368754	0.00495717
	3663.76	0.00214	0.00641	0.00224	0.00337	0.00355	0.00378	0.00647184	0.00263601	0.00309819	0.00494184	0.00367103	0.00490183
	3663.52	0.00215	0.00642	0.00225	0.00338	0.00355	0.00378	0.00654383	0.00265337	0.00315005	0.00498715	0.00363838	0.00476966
	3663.28	0.00216	0.00642	0.00226	0.00339	0.00356	0.00379	0.00660023	0.00258399	0.00316681	0.00506121	0.00361208	0.00458905
	3663.04	0.00217	0.00643	0.00226	0.0034	0.00356	0.00379	0.00661978	0.00244803	0.00316199	0.0051561	0.00360883	0.00440162
	3662.79	0.00218	0.00644	0.00227	0.00341	0.00357	0.00379	0.00659282	0.00227469	0.00315434	0.00526159	0.00363192	0.00425041
	3662.55	0.00219	0.00645	0.00228	0.00342	0.00358	0.0038	0.00652616	0.00209491	0.00316072	0.00536627	0.00366529	0.00416478
	3662.31	0.0022	0.00646	0.00229	0.00344	0.00359	0.0038	0.00644269	0.00193561	0.00319015	0.00546008	0.00368364	0.00415395
	3662.07	0.00221	0.00647	0.0023	0.00345	0.0036	0.00381	0.00637219	0.00181509	0.00324157	0.00553672	0.00366257	0.00420485
	3661.83	0.00223	0.00647	0.00231	0.00346	0.00361	0.00381	0.00634114	0.00174146	0.00330543	0.0055923	0.00359236	0.0042923
	3661.59	0.00224	0.00648	0.00232	0.00347	0.00362	0.00381	0.00636062	0.00171685	0.00336868	0.00562496	0.00348051	0.00438917
	3661.35	0.00225	0.0065	0.00233	0.00349	0.00363	0.00382	0.00642316	0.00173903	0.0034167	0.00563259	0.00335175	0.00447495
	3661.11	0.00226	0.00651	0.00234	0.0035	0.00364	0.00382	0.00650459	0.0018032	0.00343697	0.00561378	0.00323811	0.00453912
	3660.87	0.00228	0.00652	0.00235	0.00352	0.00365	0.00383	0.00657258	0.00190364	0.00342141	0.00557024	0.0031679	0.00458002
	3660.63	0.00229	0.00653	0.00236	0.00353	0.00366	0.00383	0.00660065	0.00203514	0.00336692	0.00550927	0.00315907	0.00460011
	3660.38	0.0023	0.00654	0.00237	0.00355	0.00368	0.00384	0.00657948	0.00219353	0.00327903	0.00544638	0.00321626	0.00460555
	3660.14	0.00232	0.00656	0.00238	0.00356	0.00369	0.00384	0.00652219	0.00237785	0.00317015	0.0054046	0.00333362	0.00459968
	3659.9	0.00233	0.00657	0.00239	0.00358	0.0037	0.00385	0.00645979	0.00258602	0.00305964	0.00540713	0.00349751	0.00458582
	3659.66	0.00234	0.00658	0.0024	0.00359	0.00372	0.00385	0.00642837	0.00281314	0.0029694	0.00546945	0.00369012	0.00456737
	3659.42	0.00236	0.0066	0.00241	0.00361	0.00373	0.00386	0.00645478	0.00304766	0.00291851	0.00559064	0.00388989	0.00454663
	3659.18	0.00237	0.00661	0.00242	0.00363	0.00375	0.00386	0.00654366	0.00326908	0.00291745	0.00574949	0.00406904	0.00452606
	3658.94	0.00238	0.00663	0.00243	0.00364	0.00376	0.00386	0.00667656	0.00345227	0.00296426	0.00590858	0.00419755	0.00450509
	3658.7	0.0024	0.00664	0.00244	0.00366	0.00378	0.00387	0.00681893	0.0035756	0.00304584	0.00602695	0.004249	0.00448128
	3658.46	0.00241	0.00666	0.00245	0.00368	0.00379	0.00387	0.00693342	0.0036301	0.00314199	0.00607375	0.00421001	0.00445249
	3658.21	0.00242	0.00667	0.00246	0.00369	0.00381	0.00388	0.00699092	0.0036266	0.00323476	0.00604015	0.00408893	0.00441698
	3657.97	0.00244	0.00669	0.00247	0.00371	0.00383	0.00388	0.00697763	0.00359595	0.00331424	0.00594127	0.00391638	0.00438085
	3657.73	0.00245	0.0067	0.00248	0.00373	0.00384	0.00389	0.00689167	0.00358835	0.0033833	0.00581325	0.00374429	0.00435729
	3657.49	0.00246	0.00672	0.00249	0.00375	0.00386	0.00389	0.00673938	0.00366513	0.00345856	0.00570765	0.00363679	0.00437184
	3657.25	0.00248	0.00674	0.0025	0.00376	0.00388	0.00389	0.00653091	0.0038907	0.00356527	0.00568273	0.00366498	0.00445429
	3657.01	0.00249	0.00675	0.00251	0.00378	0.0039	0.0039	0.00628132	0.00431079	0.00373218	0.00579059	0.00388683	0.00463895
	3656.77	0.0025	0.00677	0.00251	0.0038	0.00391	0.0039	0.00601784	0.0049179	0.00397866	0.00605243	0.00432118	0.00494427
	3656.53	0.00251	0.00679	0.00252	0.00381	0.00393	0.0039	0.00578878	0.0056075	0.00428956	0.0064241	0.00491005	0.0053486
	3656.29	0.00253	0.0068	0.00253	0.00383	0.00395	0.00391	0.0056613	0.0061775	0.00460584	0.00678448	0.00551114	0.00577628
	3656.04	0.00254	0.00682	0.00254	0.00385	0.00397	0.00391	0.00568717	0.00641618	0.00483861	0.00699479	0.00595607	0.00611908
	3655.8	0.00255	0.00684	0.00255	0.00386	0.00398	0.00391	0.00586738	0.00622908	0.00492196	0.00699506	0.00614972	0.00629927
	3655.56	0.00256	0.00685	0.00255	0.00388	0.004	0.00392	0.00615449	0.00568147	0.00484169	0.00683325	0.0061055	0.00630484
	3655.32	0.00257	0.00687	0.00256	0.00389	0.00402	0.00392	0.00649033	0.00492618	0.00462804	0.00660607	0.00590411	0.00617532
	3655.08	0.00259	0.00689	0.00257	0.00391	0.00404	0.00392	0.00682576	0.00411663	0.00432639	0.00639238	0.00562403	0.00596735
	3654.84	0.0026	0.00691	0.00258	0.00393	0.00406	0.00392	0.00712982	0.00336578	0.00398017	0.00623391	0.00531501	0.0057305
	3654.6	0.00261	0.00692	0.00258	0.00394	0.00407	0.00393	0.00738324	0.00274581	0.00362654	0.00614043	0.00499769	0.0055022
	3654.36	0.00262	0.00694	0.00259	0.00395	0.00409	0.00393	0.00757351	0.00229683	0.00330146	0.00610095	0.00468203	0.0053112
	3654.12	0.00263	0.00696	0.00259	0.00397	0.00411	0.00393	0.00769539	0.00203495	0.00304237	0.00609285	0.00437878	0.0051797
	3653.88	0.00264	0.00697	0.0026	0.00398	0.00413	0.00393	0.00774919	0.00195038	0.0028864	0.00608857	0.00411244	0.00512386
	3653.63	0.00265	0.00699	0.0026	0.004	0.00414	0.00393	0.00774202	0.00201235	0.00286444	0.00606343	0.00391782	0.00514982
	3653.39	0.00266	0.00701	0.00261	0.00401	0.00416	0.00393	0.00768471	0.00217259	0.00299095	0.00599921	0.00382845	0.00524862
	3653.15	0.00267	0.00702	0.00261	0.00402	0.00418	0.00393	0.00758628	0.00238614	0.00326043	0.00588818	0.00386301	0.00539816
	3652.91	0.00268	0.00704	0.00262	0.00403	0.00419	0.00393	0.00745046	0.00262679	0.00365062	0.00572962	0.00401213	0.00556975
	3652.67	0.00269	0.00706	0.00262	0.00405	0.00421	0.00393	0.00727403	0.00290041	0.00413388	0.00552797	0.00424369	0.00573699
	3652.43	0.00269	0.00707	0.00263	0.00406	0.00422	0.00393	0.00704866	0.00324989	0.00468559	0.00529031	0.00451037	0.00588338
	3652.19	0.0027	0.00709	0.00263	0.00407	0.00424	0.00393	0.00676659	0.00374622	0.00528914	0.00502701	0.00476314	0.00600826
	3651.95	0.00271	0.0071	0.00263	0.00408	0.00425	0.00393	0.00642771	0.00447556	0.0059352	0.00475829	0.00496503	0.0061295
	3651.71	0.00272	0.00712	0.00263	0.00409	0.00427	0.00393	0.00605353	0.0055077	0.0066116	0.00452358	0.00510536	0.00628363
	3651.46	0.00273	0.00714	0.00264	0.0041	0.00428	0.00393	0.00569567	0.00684569	0.00729921	0.00438608	0.00520913	0.0065196
	3651.22	0.00273	0.00715	0.00264	0.00411	0.0043	0.00393	0.00543516	0.00837457	0.00796436	0.00442257	0.00534167	0.00688063
	3650.98	0.00274	0.00717	0.00264	0.00412	0.00431	0.00393	0.00535509	0.00985468	0.00856948	0.00468112	0.00558126	0.00737823
	3650.74	0.00275	0.00718	0.00264	0.00412	0.00432	0.00392	0.00549298	0.011003	0.00908733	0.00513975	0.00597359	0.00797892
	3650.5	0.00275	0.00719	0.00264	0.00413	0.00434	0.00392	0.00580512	0.0116174	0.00950744	0.00569557	0.00649173	0.00861058
	3650.26	0.00276	0.00721	0.00264	0.00414	0.00435	0.00392	0.00619941	0.0116446	0.00982859	0.00621597	0.00704145	0.00919738
	3650.02	0.00276	0.00722	0.00264	0.00414	0.00436	0.00392	0.00657969	0.0111517	0.0100387	0.00659646	0.00749773	0.00967627
	3649.78	0.00277	0.00724	0.00264	0.00415	0.00437	0.00391	0.00688083	0.0102777	0.0101096	0.00678565	0.00775244	0.0100053
	3649.54	0.00277	0.00725	0.00264	0.00416	0.00439	0.00391	0.00706519	0.00919845	0.0100147	0.00678299	0.00774692	0.010163
	3649.29	0.00278	0.00726	0.00264	0.00416	0.0044	0.00391	0.00712312	0.00810457	0.00975874	0.00662856	0.00750073	0.010157
	3649.05	0.00278	0.00727	0.00264	0.00417	0.00441	0.0039	0.00706548	0.0071712	0.00939723	0.00638056	0.0071023	0.0100268
	3648.81	0.00278	0.00729	0.00264	0.00417	0.00442	0.0039	0.00691675	0.00651934	0.0090192	0.00609076	0.00666363	0.00983336
	3648.57	0.00279	0.0073	0.00264	0.00417	0.00443	0.00389	0.00671395	0.00620236	0.0087127	0.00579182	0.00627027	0.00963463
	3648.33	0.00279	0.00731	0.00264	0.00418	0.00444	0.00389	0.00650175	0.00622254	0.00852985	0.00550213	0.00595445	0.00947289
	3648.09	0.00279	0.00732	0.00263	0.00418	0.00444	0.00388	0.00633554	0.00654539	0.00847963	0.00523275	0.00570359	0.00936696
	3647.85	0.0028	0.00733	0.00263	0.00418	0.00445	0.00388	0.00628566	0.00710297	0.00851873	0.00501027	0.00547846	0.00931072
	3647.61	0.0028	0.00734	0.00263	0.00419	0.00446	0.00387	0.00642387	0.00776826	0.00855409	0.00487863	0.00523314	0.0092689
	3647.37	0.0028	0.00735	0.00263	0.00419	0.00447	0.00387	0.00678889	0.00834175	0.00846057	0.00489318	0.004939	0.00918376
	3647.13	0.0028	0.00737	0.00262	0.00419	0.00448	0.00386	0.00733071	0.00859216	0.00813143	0.0050823	0.00460417	0.00899162
	3646.88	0.0028	0.00738	0.00262	0.00419	0.00448	0.00385	0.00790696	0.00837159	0.00754662	0.00540767	0.00427268	0.00865843
	3646.64	0.00281	0.00739	0.00262	0.00419	0.00449	0.00385	0.00836522	0.00770121	0.00678869	0.00578285	0.0039986	0.00820097
	3646.4	0.00281	0.0074	0.00261	0.00419	0.00449	0.00384	0.00864068	0.00673986	0.00598492	0.00612956	0.00380809	0.0076708
	3646.16	0.00281	0.0074	0.00261	0.0042	0.0045	0.00383	0.00875793	0.00567697	0.00523634	0.00641462	0.00369486	0.00712312
	3645.92	0.00281	0.00741	0.00261	0.0042	0.00451	0.00383	0.00878494	0.00465276	0.00458992	0.00664218	0.00363153	0.00659774
	3645.68	0.00281	0.00742	0.0026	0.0042	0.00451	0.00382	0.00878717	0.00374691	0.00404879	0.00683002	0.00358747	0.00611365
	3645.44	0.00281	0.00743	0.0026	0.0042	0.00452	0.00381	0.00881316	0.00299627	0.00359691	0.00699595	0.00353343	0.00568168
	3645.2	0.00281	0.00744	0.00259	0.0042	0.00452	0.0038	0.00888708	0.00241536	0.00321512	0.00714694	0.00345032	0.00530891
	3644.96	0.00281	0.00745	0.00259	0.0042	0.00452	0.00379	0.00901148	0.00200869	0.00288991	0.00728003	0.00332849	0.00500355
	3644.71	0.00281	0.00746	0.00258	0.0042	0.00453	0.00378	0.0091713	0.00177325	0.00261769	0.0073858	0.00316914	0.00477334
	3644.47	0.00281	0.00746	0.00258	0.0042	0.00453	0.00378	0.00934232	0.00170311	0.00240233	0.00745161	0.00298469	0.00462592
	3644.23	0.00281	0.00747	0.00257	0.0042	0.00453	0.00377	0.00949962	0.00178472	0.00225202	0.00747075	0.00279479	0.0045655
	3643.99	0.00281	0.00748	0.00257	0.00419	0.00454	0.00376	0.00962678	0.00199849	0.00217168	0.00744577	0.00262187	0.00459007
	3643.75	0.00281	0.00749	0.00256	0.00419	0.00454	0.00375	0.00971623	0.00231632	0.00215921	0.0073883	0.00248522	0.00468822
	3643.51	0.00281	0.00749	0.00256	0.00419	0.00454	0.00374	0.00976803	0.00269985	0.00220276	0.00731511	0.00239704	0.00483731
	3643.27	0.00281	0.0075	0.00255	0.00419	0.00454	0.00373	0.00978598	0.00309692	0.00228329	0.00724329	0.00236064	0.00500556
	3643.03	0.00281	0.00751	0.00255	0.00419	0.00455	0.00372	0.00977229	0.0034468	0.00237695	0.00718579	0.00236989	0.00515569
	3642.79	0.00281	0.00751	0.00254	0.00419	0.00455	0.00371	0.00972556	0.00368769	0.00246311	0.00714439	0.00241103	0.00525327
	3642.55	0.0028	0.00752	0.00254	0.00419	0.00455	0.0037	0.00964626	0.00377263	0.00253037	0.00711413	0.00246733	0.0052804
	3642.3	0.0028	0.00753	0.00253	0.00419	0.00455	0.00368	0.00953914	0.00368266	0.00257933	0.00708466	0.00252139	0.0052427
	3642.06	0.0028	0.00753	0.00253	0.00419	0.00455	0.00367	0.00941755	0.00343688	0.00262052	0.00704817	0.00255982	0.00517027
	3641.82	0.0028	0.00754	0.00252	0.00419	0.00455	0.00366	0.00930188	0.00308414	0.00266637	0.00700327	0.00257399	0.00510408
	3641.58	0.0028	0.00755	0.00251	0.00419	0.00456	0.00365	0.00921345	0.00268985	0.00272543	0.00695631	0.00255849	0.0050838
	3641.34	0.0028	0.00755	0.00251	0.00419	0.00456	0.00364	0.0091664	0.00231829	0.00279754	0.00691552	0.0025119	0.00513205
	3641.1	0.0028	0.00756	0.0025	0.0042	0.00456	0.00363	0.0091653	0.00201758	0.00287302	0.00688845	0.00243629	0.00524785
	3640.86	0.0028	0.00757	0.0025	0.0042	0.00456	0.00362	0.0092029	0.00181262	0.00293818	0.00687775	0.00234085	0.00541003
	3640.62	0.00279	0.00757	0.00249	0.0042	0.00456	0.0036	0.00926483	0.00170635	0.00297976	0.00687955	0.00224104	0.0055853
	3640.38	0.00279	0.00758	0.00249	0.0042	0.00456	0.00359	0.00933244	0.00168324	0.00299191	0.00688622	0.00216126	0.0057419
	3640.13	0.00279	0.00759	0.00248	0.0042	0.00456	0.00358	0.00939027	0.00172003	0.00297719	0.00688829	0.0021282	0.00585683
	3639.89	0.00279	0.00759	0.00248	0.0042	0.00456	0.00357	0.00942769	0.00179058	0.00294714	0.00687673	0.00216582	0.00592
	3639.65	0.00279	0.0076	0.00247	0.00421	0.00457	0.00356	0.00943902	0.00187564	0.00291888	0.00684451	0.00228646	0.00593582
	3639.41	0.00279	0.0076	0.00247	0.00421	0.00457	0.00354	0.00942452	0.00196528	0.00290938	0.0067864	0.00248504	0.00591486
	3639.17	0.00279	0.00761	0.00246	0.00421	0.00457	0.00353	0.00938771	0.00205729	0.00293212	0.00670156	0.00273919	0.00586894
	3638.93	0.00279	0.00762	0.00246	0.00422	0.00457	0.00352	0.00933391	0.00215381	0.00299113	0.00659191	0.00301258	0.00580429
	3638.69	0.00279	0.00762	0.00246	0.00422	0.00457	0.00351	0.00927286	0.00225669	0.00308264	0.00646487	0.00326519	0.00572469
	3638.45	0.00278	0.00763	0.00245	0.00423	0.00458	0.00349	0.0092186	0.00236069	0.00319264	0.00633414	0.00346351	0.00563093
	3638.21	0.00278	0.00764	0.00245	0.00423	0.00458	0.00348	0.00918893	0.00245283	0.0033016	0.00621842	0.00359103	0.00552838
	3637.96	0.00278	0.00764	0.00244	0.00424	0.00458	0.00347	0.00920106	0.00251342	0.00338774	0.00613656	0.0036521	0.00542791
	3637.72	0.00278	0.00765	0.00244	0.00424	0.00458	0.00345	0.00926491	0.00252455	0.00343484	0.00610099	0.00366772	0.00534587
	3637.48	0.00278	0.00766	0.00244	0.00425	0.00459	0.00344	0.00937735	0.00247718	0.00343494	0.00611222	0.00366363	0.00529798
	3637.24	0.00278	0.00766	0.00243	0.00426	0.00459	0.00343	0.00952104	0.00237748	0.00338968	0.00615912	0.00365995	0.00529173
	3637	0.00278	0.00767	0.00243	0.00426	0.00459	0.00342	0.00966906	0.00224643	0.00330802	0.00622471	0.00366384	0.00532307
	3636.76	0.00278	0.00768	0.00243	0.00427	0.0046	0.0034	0.0097933	0.00211511	0.00320151	0.00629489	0.00366989	0.00537691
	3636.52	0.00278	0.00769	0.00243	0.00428	0.0046	0.00339	0.00987155	0.00201794	0.00308233	0.00636263	0.00366668	0.00543122
	3636.28	0.00278	0.00769	0.00243	0.00429	0.00461	0.00338	0.00989427	0.0019847	0.0029605	0.0064318	0.0036465	0.00546476
	3636.04	0.00278	0.0077	0.00242	0.0043	0.00461	0.00337	0.00986502	0.00203595	0.00284522	0.00651249	0.00360887	0.00546282
	3635.8	0.00278	0.00771	0.00242	0.00431	0.00462	0.00335	0.00979947	0.00217818	0.00274727	0.0066154	0.00356383	0.00542376
	3635.55	0.00279	0.00772	0.00242	0.00432	0.00462	0.00334	0.00971921	0.00240749	0.0026805	0.00674402	0.00352876	0.00536158
	3635.31	0.00279	0.00772	0.00242	0.00433	0.00463	0.00333	0.00964527	0.00270987	0.00266219	0.00688906	0.00352294	0.00530374
	3635.07	0.00279	0.00773	0.00242	0.00434	0.00463	0.00332	0.00959126	0.00306783	0.00271325	0.007027	0.00356198	0.00528515
	3634.83	0.00279	0.00774	0.00242	0.00435	0.00464	0.00331	0.00956235	0.00345985	0.00285242	0.0071228	0.00365376	0.00534234
	3634.59	0.00279	0.00775	0.00242	0.00436	0.00465	0.00329	0.009554	0.00385872	0.00308898	0.00713819	0.0037951	0.00550104
	3634.35	0.00279	0.00776	0.00242	0.00437	0.00465	0.00328	0.00955642	0.00422784	0.00341118	0.00704538	0.00397469	0.00576652
	3634.11	0.0028	0.00777	0.00242	0.00439	0.00466	0.00327	0.00956002	0.00452017	0.00377685	0.00684664	0.00417095	0.00610974
	3633.87	0.0028	0.00777	0.00242	0.0044	0.00467	0.00326	0.00955875	0.00468667	0.0041148	0.00658437	0.00435853	0.00646602
	3633.63	0.0028	0.00778	0.00243	0.00442	0.00468	0.00325	0.00955786	0.00469974	0.00434906	0.00633466	0.00451574	0.00675468
	3633.38	0.0028	0.00779	0.00243	0.00443	0.00469	0.00324	0.00956595	0.0045651	0.00442942	0.00617115	0.00463126	0.00691297
	3633.14	0.00281	0.0078	0.00243	0.00444	0.0047	0.00323	0.00959315	0.00432381	0.00435607	0.00612912	0.00470676	0.00692501
	3632.9	0.00281	0.00781	0.00243	0.00446	0.00471	0.00322	0.00964142	0.00403595	0.00417153	0.0061973	0.00475251	0.00682241
	3632.66	0.00282	0.00782	0.00244	0.00448	0.00472	0.00321	0.00970692	0.0037591	0.00394125	0.00633252	0.00477977	0.00666869
	3632.42	0.00282	0.00783	0.00244	0.00449	0.00473	0.0032	0.00978193	0.00354002	0.00372898	0.00648356	0.00479834	0.00653303
	3632.18	0.00282	0.00784	0.00245	0.00451	0.00474	0.00319	0.00985411	0.0034101	0.00358534	0.00660354	0.00481523	0.00647534
	3631.94	0.00283	0.00785	0.00245	0.00453	0.00475	0.00318	0.00990976	0.00338734	0.00354172	0.0066563	0.0048361	0.00653373
	3631.7	0.00283	0.00786	0.00246	0.00454	0.00476	0.00318	0.00993473	0.0034775	0.00361125	0.00661874	0.00486558	0.00672071
	3631.46	0.00284	0.00787	0.00246	0.00456	0.00477	0.00317	0.00991558	0.00367894	0.00378913	0.00647894	0.00490964	0.00702262
	3631.21	0.00285	0.00788	0.00247	0.00458	0.00479	0.00316	0.00983934	0.00398572	0.00406141	0.0062348	0.00497569	0.0074032
	3630.97	0.00285	0.00789	0.00247	0.0046	0.0048	0.00315	0.00969825	0.00439302	0.00440974	0.00589288	0.00507267	0.00781692
	3630.73	0.00286	0.0079	0.00248	0.00462	0.00481	0.00315	0.00948708	0.00490377	0.00482004	0.00546343	0.00521363	0.00821728
	3630.49	0.00287	0.00791	0.00249	0.00464	0.00483	0.00314	0.00920975	0.00553441	0.00528318	0.00496404	0.0054194	0.00856623
	3630.25	0.00287	0.00792	0.0025	0.00466	0.00484	0.00314	0.00888329	0.00631132	0.00579593	0.00442471	0.00571767	0.00883575
	3630.01	0.00288	0.00793	0.0025	0.00467	0.00486	0.00313	0.00854966	0.00726407	0.00634995	0.00390116	0.00614581	0.00901021
	3629.77	0.00289	0.00794	0.00251	0.0047	0.00487	0.00313	0.00829476	0.00839714	0.00692165	0.00349391	0.00673837	0.00908603
	3629.53	0.0029	0.00795	0.00252	0.00472	0.00489	0.00312	0.00825904	0.00964125	0.00745437	0.00335506	0.00750012	0.00907502
	3629.29	0.00291	0.00796	0.00253	0.00474	0.0049	0.00312	0.00860344	0.0107992	0.00785133	0.00364329	0.00835611	0.00899943
	3629.05	0.00292	0.00797	0.00254	0.00476	0.00492	0.00312	0.00937476	0.0115712	0.00800868	0.00438429	0.00913487	0.00889045
	3628.8	0.00293	0.00799	0.00255	0.00478	0.00494	0.00311	0.0103825	0.0117105	0.00788117	0.00535264	0.00962841	0.00877181
	3628.56	0.00294	0.008	0.00256	0.0048	0.00496	0.00311	0.0112956	0.0112014	0.00751606	0.00620898	0.00972767	0.0086477
	3628.32	0.00295	0.00801	0.00257	0.00482	0.00497	0.00311	0.0118952	0.0102559	0.00701791	0.00675828	0.00947515	0.00850693
	3628.08	0.00296	0.00802	0.00259	0.00484	0.00499	0.00311	0.0121641	0.00915293	0.0064814	0.00701245	0.00900123	0.00833952
	3627.84	0.00297	0.00803	0.0026	0.00487	0.00501	0.00311	0.0121889	0.00810717	0.00596512	0.0070736	0.00843707	0.0081436
	3627.6	0.00298	0.00804	0.00261	0.00489	0.00503	0.00311	0.012067	0.00723891	0.00549509	0.00703826	0.00786937	0.00792587
	3627.36	0.00299	0.00805	0.00263	0.00491	0.00505	0.00311	0.0118703	0.00659448	0.00508137	0.00696959	0.00734474	0.00769486
	3627.12	0.00301	0.00807	0.00264	0.00493	0.00507	0.00311	0.0116465	0.00617239	0.00472834	0.00690088	0.00687634	0.00746094
	3626.88	0.00302	0.00808	0.00265	0.00496	0.00509	0.00312	0.0114292	0.00594243	0.00444071	0.00684969	0.00646321	0.00723402
	3626.63	0.00303	0.00809	0.00267	0.00498	0.00511	0.00312	0.0112453	0.00585231	0.0042222	0.00682632	0.0060977	0.00702572
	3626.39	0.00305	0.0081	0.00268	0.005	0.00513	0.00312	0.0111169	0.00583486	0.00407595	0.00683755	0.00577594	0.00684639
	3626.15	0.00306	0.00811	0.0027	0.00502	0.00515	0.00313	0.0110641	0.00581815	0.00400047	0.00688909	0.00550321	0.00670631
	3625.91	0.00307	0.00813	0.00271	0.00505	0.00517	0.00313	0.0110979	0.00574413	0.00398889	0.00698079	0.00529601	0.00661337
	3625.67	0.00309	0.00814	0.00273	0.00507	0.00519	0.00314	0.0112151	0.00558737	0.00402808	0.0071038	0.00517786	0.00657203
	3625.43	0.0031	0.00815	0.00275	0.00509	0.00521	0.00315	0.011399	0.00536249	0.00410367	0.0072419	0.00516884	0.006584
	3625.19	0.00312	0.00816	0.00276	0.00511	0.00523	0.00315	0.0116251	0.00511529	0.00420166	0.00737549	0.00527449	0.00664637
	3624.95	0.00314	0.00817	0.00278	0.00514	0.00525	0.00316	0.0118682	0.00490064	0.00431227	0.00748877	0.00548107	0.00675843
	3624.71	0.00315	0.00819	0.0028	0.00516	0.00527	0.00317	0.0121072	0.00476024	0.00442664	0.00757403	0.00575612	0.0069172
	3624.46	0.00317	0.0082	0.00282	0.00518	0.0053	0.00318	0.0123246	0.0047108	0.00453436	0.00763376	0.00605246	0.00711821
	3624.22	0.00319	0.00821	0.00284	0.00521	0.00532	0.00319	0.0125053	0.00474254	0.00462089	0.00767947	0.00631707	0.00734963
	3623.98	0.0032	0.00822	0.00286	0.00523	0.00534	0.0032	0.0126393	0.0048261	0.0046687	0.00772939	0.0065011	0.00759301
	3623.74	0.00322	0.00824	0.00287	0.00525	0.00536	0.00321	0.0127233	0.00492452	0.00466419	0.00780477	0.0065737	0.00782407
	3623.5	0.00324	0.00825	0.00289	0.00527	0.00539	0.00322	0.0127654	0.00500741	0.0046026	0.00792082	0.00653599	0.00801925
	3623.26	0.00326	0.00826	0.00291	0.0053	0.00541	0.00323	0.0127862	0.00506324	0.0044949	0.00808306	0.00641858	0.00816407
	3623.02	0.00328	0.00827	0.00293	0.00532	0.00543	0.00325	0.0128131	0.00509851	0.00436764	0.00828451	0.00627389	0.0082579
	3622.78	0.0033	0.00829	0.00295	0.00534	0.00545	0.00326	0.012872	0.00513326	0.00425609	0.00850771	0.00615852	0.00831236
	3622.54	0.00331	0.0083	0.00297	0.00536	0.00547	0.00327	0.0129771	0.0051887	0.00419499	0.00873008	0.00611513	0.00834363
	3622.3	0.00333	0.00831	0.00299	0.00538	0.0055	0.00329	0.0131233	0.00527963	0.0042136	0.00892463	0.00616279	0.0083679
	3622.05	0.00335	0.00832	0.00302	0.00541	0.00552	0.00331	0.0132829	0.00541232	0.00432589	0.00906539	0.00629426	0.00839344
	3621.81	0.00337	0.00834	0.00304	0.00543	0.00554	0.00332	0.0134105	0.0055859	0.00452881	0.00912979	0.006482	0.00842211
	3621.57	0.00339	0.00835	0.00306	0.00545	0.00556	0.00334	0.0134519	0.00580061	0.00480258	0.00909966	0.00668789	0.00845078
	3621.33	0.00341	0.00836	0.00308	0.00547	0.00558	0.00335	0.0133629	0.00606171	0.00511559	0.00896723	0.00687414	0.00847991
	3621.09	0.00343	0.00837	0.0031	0.00549	0.00561	0.00337	0.0131217	0.00638121	0.00543442	0.00873429	0.00701062	0.00851682
	3620.85	0.00345	0.00838	0.00312	0.00551	0.00563	0.00339	0.0127404	0.00677094	0.00572583	0.00841628	0.00707775	0.00857871
	3620.61	0.00347	0.0084	0.00314	0.00553	0.00565	0.00341	0.0122657	0.00723051	0.00596461	0.00804298	0.00706048	0.00868804
	3620.37	0.00349	0.00841	0.00316	0.00555	0.00567	0.00343	0.0117808	0.00773075	0.00613278	0.00766566	0.00694793	0.00886445
	3620.13	0.00351	0.00842	0.00318	0.00557	0.00569	0.00345	0.0113901	0.00820768	0.00622502	0.00735458	0.00673504	0.00911096
	3619.88	0.00353	0.00843	0.00321	0.00559	0.00571	0.00347	0.0111916	0.00856876	0.00625629	0.00718873	0.00643934	0.00940551
	3619.64	0.00356	0.00845	0.00323	0.00561	0.00573	0.00349	0.0112222	0.00873509	0.00626189	0.00721926	0.00611019	0.00969892
	3619.4	0.00358	0.00846	0.00325	0.00562	0.00575	0.00351	0.0114298	0.00868926	0.00628862	0.00743544	0.00582411	0.00993915
	3619.16	0.0036	0.00847	0.00327	0.00564	0.00577	0.00353	0.0116935	0.00849589	0.00637488	0.00776702	0.00565856	0.0101003
	3618.92	0.00362	0.00848	0.00329	0.00566	0.00579	0.00355	0.0118949	0.0082651	0.00653034	0.00812588	0.0056655	0.0101925
	3618.68	0.00364	0.00849	0.00331	0.00568	0.00581	0.00357	0.0119687	0.00809763	0.00673485	0.00844533	0.00585603	0.0102495
	3618.44	0.00366	0.00851	0.00333	0.00569	0.00583	0.00359	0.0119177	0.00804641	0.00694123	0.00869594	0.00620643	0.0103058
	3618.2	0.00368	0.00852	0.00335	0.00571	0.00585	0.00362	0.0118008	0.00810116	0.00708924	0.00888113	0.00666204	0.0103798
	3617.96	0.0037	0.00853	0.00337	0.00573	0.00586	0.00364	0.011711	0.00819694	0.00711668	0.00902186	0.00714523	0.0104639
	3617.71	0.00372	0.00854	0.00339	0.00574	0.00588	0.00366	0.0117407	0.00823294	0.00698441	0.00914365	0.00756825	0.0105289
	3617.47	0.00374	0.00855	0.00341	0.00576	0.0059	0.00368	0.0119358	0.00812123	0.00669539	0.00926074	0.00786169	0.01054
	3617.23	0.00376	0.00856	0.00343	0.00577	0.00592	0.00371	0.0122742	0.007831	0.00630445	0.00937295	0.00800239	0.0104803
	3616.99	0.00377	0.00857	0.00345	0.00579	0.00593	0.00373	0.0126791	0.00740669	0.00589194	0.00946679	0.00801937	0.0103613
	3616.75	0.00379	0.00859	0.00347	0.0058	0.00595	0.00375	0.0130623	0.00694269	0.00553308	0.00952803	0.00797044	0.0102176
	3616.51	0.00381	0.0086	0.00348	0.00582	0.00596	0.00378	0.0133568	0.00654261	0.00527708	0.00954687	0.00791181	0.0100915
	3616.27	0.00383	0.00861	0.0035	0.00583	0.00598	0.0038	0.0135256	0.00629159	0.00514737	0.00952046	0.00787563	0.010017
	3616.03	0.00385	0.00862	0.00352	0.00584	0.00599	0.00382	0.0135557	0.00624557	0.00515058	0.00944953	0.00786493	0.0100156
	3615.79	0.00386	0.00863	0.00354	0.00586	0.006	0.00384	0.0134502	0.00642449	0.00528388	0.00933603	0.00785701	0.0100911
	3615.55	0.00388	0.00864	0.00355	0.00587	0.00602	0.00387	0.0132334	0.00680641	0.00553374	0.00918498	0.0078113	0.0102304
	3615.3	0.0039	0.00865	0.00357	0.00588	0.00603	0.00389	0.0129522	0.00732024	0.00587306	0.00900391	0.00768303	0.0104046
	3615.06	0.00391	0.00866	0.00358	0.00589	0.00604	0.00391	0.0126789	0.00785158	0.00625458	0.00880605	0.00744648	0.0105752
	3614.82	0.00393	0.00867	0.0036	0.0059	0.00605	0.00394	0.0124917	0.0082782	0.00661503	0.00861032	0.00711017	0.0107061
	3614.58	0.00394	0.00868	0.00361	0.00591	0.00606	0.00396	0.0124439	0.00852109	0.00689587	0.008437	0.00672292	0.0107807
	3614.34	0.00396	0.00869	0.00363	0.00592	0.00607	0.00398	0.0125379	0.00858414	0.00706346	0.0083024	0.00635152	0.0108081
	3614.1	0.00397	0.00869	0.00364	0.00593	0.00608	0.004	0.0127339	0.00854284	0.00711952	0.00821599	0.00605262	0.0108157
	3613.86	0.00398	0.0087	0.00365	0.00594	0.00609	0.00402	0.0129741	0.00850739	0.00709293	0.00818302	0.00585607	0.0108344
	3613.62	0.004	0.00871	0.00366	0.00595	0.0061	0.00404	0.0132039	0.00857502	0.00702906	0.00820719	0.00576593	0.0108894
	3613.38	0.00401	0.00872	0.00367	0.00596	0.00611	0.00406	0.0133857	0.00879982	0.00697631	0.00829335	0.00576762	0.010996
	3613.13	0.00402	0.00873	0.00368	0.00596	0.00611	0.00408	0.0135019	0.0091667	0.00697461	0.00844354	0.00583906	0.011154
	3612.89	0.00403	0.00873	0.00369	0.00597	0.00612	0.0041	0.0135587	0.00958082	0.00704388	0.00865011	0.00595787	0.0113467
	3612.65	0.00404	0.00874	0.0037	0.00598	0.00613	0.00412	0.0135901	0.0098844	0.0071683	0.0088903	0.0061093	0.0115395
	3612.41	0.00405	0.00875	0.00371	0.00598	0.00613	0.00414	0.0136447	0.00992186	0.00730095	0.0091281	0.00628708	0.0116894
	3612.17	0.00406	0.00875	0.00372	0.00599	0.00613	0.00416	0.0137597	0.00962451	0.00738028	0.00933073	0.00649194	0.0117619
	3611.93	0.00407	0.00876	0.00372	0.00599	0.00614	0.00418	0.0139388	0.0090443	0.00736464	0.00948212	0.00672833	0.0117439
	3611.69	0.00407	0.00877	0.00373	0.006	0.00614	0.0042	0.0141553	0.00831655	0.00724624	0.00958511	0.00699523	0.0116452
	3611.45	0.00408	0.00877	0.00373	0.006	0.00614	0.00421	0.0143711	0.00758272	0.00704843	0.00964825	0.0072883	0.0114914
	3611.21	0.00408	0.00878	0.00374	0.00601	0.00615	0.00423	0.014552	0.00694955	0.00680592	0.0096807	0.00760135	0.0113111
	3610.97	0.00409	0.00878	0.00374	0.00601	0.00615	0.00425	0.0146727	0.00647815	0.00655248	0.00968387	0.00792851	0.0111309
	3610.72	0.00409	0.00878	0.00375	0.00601	0.00615	0.00426	0.0147173	0.00620004	0.0063168	0.00965528	0.00826519	0.010975
	3610.48	0.0041	0.00879	0.00375	0.00602	0.00615	0.00428	0.01468	0.00613206	0.00612341	0.00959044	0.00860471	0.0108659
	3610.24	0.0041	0.00879	0.00375	0.00602	0.00615	0.00429	0.0145662	0.00628591	0.00599696	0.00948773	0.00893833	0.0108254
	3610	0.0041	0.00879	0.00375	0.00602	0.00615	0.0043	0.0144001	0.00666202	0.00596388	0.00935464	0.00924663	0.0108701
	3609.76	0.0041	0.00879	0.00375	0.00602	0.00615	0.00432	0.0142303	0.00723264	0.00604826	0.00921339	0.00950025	0.0110042
	3609.52	0.0041	0.00879	0.00375	0.00602	0.00614	0.00433	0.0141265	0.00791857	0.00626127	0.00910099	0.00966144	0.0112138
	3609.28	0.0041	0.0088	0.00375	0.00602	0.00614	0.00434	0.014151	0.0085907	0.00658334	0.00905557	0.00970496	0.0114635
	3609.04	0.0041	0.0088	0.00374	0.00602	0.00614	0.00435	0.0143155	0.00911523	0.00696385	0.00909059	0.00963813	0.0117132
	3608.8	0.0041	0.0088	0.00374	0.00602	0.00613	0.00436	0.01457	0.0094268	0.00734418	0.00918463	0.00950141	0.0119433
	3608.55	0.0041	0.00879	0.00374	0.00602	0.00613	0.00437	0.0148418	0.0095504	0.00768464	0.00929722	0.00934905	0.0121622
	3608.31	0.00409	0.00879	0.00373	0.00602	0.00613	0.00438	0.0150757	0.00956889	0.00797517	0.00939611	0.00922099	0.0123973
	3608.07	0.00409	0.00879	0.00373	0.00602	0.00612	0.00438	0.0152509	0.00957112	0.00822437	0.00946761	0.00913461	0.0126732
	3607.83	0.00408	0.00879	0.00372	0.00602	0.00611	0.00439	0.0153761	0.00962074	0.00844573	0.00951501	0.00908378	0.0129991
	3607.59	0.00408	0.00878	0.00371	0.00602	0.00611	0.0044	0.0154744	0.0097367	0.00864339	0.00955192	0.00904543	0.0133563
	3607.35	0.00407	0.00878	0.00371	0.00601	0.0061	0.0044	0.0155717	0.00988712	0.00880495	0.00959632	0.00898428	0.0136959
	3607.11	0.00406	0.00877	0.0037	0.00601	0.0061	0.00441	0.0156832	0.00999546	0.00890202	0.00966124	0.00886547	0.0139443
	3606.87	0.00405	0.00877	0.00369	0.00601	0.00609	0.00441	0.0158032	0.00997317	0.00889999	0.00974791	0.00867051	0.0140313
	3606.63	0.00405	0.00876	0.00368	0.006	0.00608	0.00441	0.0159066	0.00976388	0.00877687	0.00984328	0.00841217	0.0139261
	3606.38	0.00404	0.00876	0.00367	0.006	0.00607	0.00442	0.0159651	0.00937906	0.00853712	0.00993201	0.00813432	0.0136552
	3606.14	0.00403	0.00875	0.00366	0.006	0.00607	0.00442	0.0159662	0.00888704	0.00820888	0.0100038	0.00789364	0.0132843
	3605.9	0.00402	0.00874	0.00365	0.00599	0.00606	0.00442	0.0159178	0.00837591	0.00782946	0.0100611	0.00774142	0.0128906
	3605.66	0.004	0.00873	0.00363	0.00599	0.00605	0.00442	0.0158447	0.00792252	0.00743815	0.0101135	0.00771244	0.0125367
	3605.42	0.00399	0.00872	0.00362	0.00598	0.00604	0.00442	0.0157797	0.00757426	0.00706613	0.0101735	0.00782601	0.0122639
	3605.18	0.00398	0.00871	0.00361	0.00598	0.00603	0.00442	0.0157531	0.00734915	0.00673969	0.0102495	0.00808081	0.0120898
	3604.94	0.00397	0.0087	0.00359	0.00597	0.00602	0.00442	0.0157862	0.00724315	0.00647934	0.010342	0.00845452	0.0120142
	3604.7	0.00395	0.00869	0.00358	0.00597	0.00601	0.00441	0.0158817	0.00723838	0.00629797	0.0104414	0.00890239	0.0120178
	3604.46	0.00394	0.00867	0.00356	0.00596	0.006	0.00441	0.016022	0.00731277	0.00620017	0.0105307	0.0093611	0.0120704
	3604.22	0.00393	0.00866	0.00355	0.00596	0.00599	0.00441	0.0161718	0.00744723	0.0061803	0.0105883	0.00975878	0.0121341
	3603.97	0.00391	0.00864	0.00353	0.00595	0.00598	0.0044	0.01629	0.00762665	0.00622639	0.010597	0.0100287	0.012177
	3603.73	0.00389	0.00863	0.00352	0.00595	0.00597	0.0044	0.0163418	0.00783293	0.00632273	0.0105478	0.0101224	0.0121794
	3603.49	0.00388	0.00861	0.0035	0.00594	0.00596	0.00439	0.0163109	0.00803774	0.00645334	0.0104433	0.0100208	0.012141
	3603.25	0.00386	0.00859	0.00348	0.00593	0.00595	0.00438	0.0162042	0.00819936	0.00660615	0.010296	0.00973851	0.0120819
	3603.01	0.00385	0.00858	0.00347	0.00593	0.00594	0.00438	0.0160501	0.0082693	0.00677358	0.0101254	0.00932837	0.0120372
	3602.77	0.00383	0.00856	0.00345	0.00592	0.00593	0.00437	0.0158893	0.00821386	0.00695379	0.00995145	0.00887219	0.0120475
	3602.53	0.00381	0.00854	0.00343	0.00591	0.00592	0.00436	0.0157604	0.00803038	0.0071513	0.00978971	0.00846584	0.0121481
	3602.29	0.00379	0.00852	0.00341	0.00591	0.00591	0.00435	0.0156893	0.00776124	0.00737274	0.00964767	0.00819536	0.0123551
	3602.05	0.00378	0.0085	0.00339	0.0059	0.0059	0.00434	0.0156836	0.00748536	0.00762407	0.0095261	0.00811618	0.0126612
	3601.8	0.00376	0.00847	0.00338	0.00589	0.00589	0.00433	0.0157325	0.00729724	0.00790175	0.00942257	0.00824099	0.0130348
	3601.56	0.00374	0.00845	0.00336	0.00589	0.00588	0.00432	0.0158142	0.0072798	0.00818769	0.00933629	0.00853533	0.0134224
	3601.32	0.00372	0.00843	0.00334	0.00588	0.00587	0.00431	0.0158987	0.00747315	0.00844474	0.00926967	0.00892204	0.013757
	3601.08	0.0037	0.0084	0.00332	0.00587	0.00586	0.0043	0.0159538	0.00785392	0.0086207	0.00922627	0.00929376	0.0139707
	3600.84	0.00369	0.00838	0.0033	0.00586	0.00585	0.00429	0.0159547	0.00833467	0.00866377	0.00920854	0.00954278	0.0140197
	3600.6	0.00367	0.00835	0.00328	0.00586	0.00585	0.00428	0.0158912	0.00879302	0.00854515	0.00921146	0.00959858	0.0139001
	3600.36	0.00365	0.00832	0.00326	0.00585	0.00584	0.00426	0.0157737	0.00912162	0.00827411	0.00922498	0.00945141	0.0136548
	3600.12	0.00363	0.00829	0.00324	0.00584	0.00583	0.00425	0.0156295	0.00926829	0.00789665	0.00923785	0.00915095	0.0133577
	3599.88	0.00361	0.00826	0.00322	0.00583	0.00582	0.00424	0.0154932	0.00924347	0.00747966	0.00924623	0.00877902	0.0130879
	3599.63	0.00359	0.00823	0.0032	0.00583	0.00581	0.00422	0.0154006	0.00909733	0.00708905	0.00925505	0.00841576	0.0129081
	3599.39	0.00357	0.0082	0.00318	0.00582	0.0058	0.00421	0.0153783	0.00888636	0.00677693	0.00927902	0.00812024	0.0128509
	3599.15	0.00355	0.00817	0.00316	0.00581	0.00579	0.0042	0.0154411	0.00865145	0.00657463	0.00933704	0.00792258	0.0129188
	3598.91	0.00354	0.00814	0.00314	0.0058	0.00579	0.00418	0.0155843	0.00841013	0.0064916	0.00944201	0.00782696	0.0130841
	3598.67	0.00352	0.00811	0.00312	0.0058	0.00578	0.00417	0.0157811	0.00816014	0.00651532	0.0095947	0.00781997	0.0132959
	3598.43	0.0035	0.00808	0.0031	0.00579	0.00577	0.00415	0.0159853	0.00789361	0.0066135	0.00977578	0.00787861	0.0134873
	3598.19	0.00348	0.00804	0.00309	0.00578	0.00576	0.00414	0.0161451	0.00761446	0.00674292	0.00994898	0.00797914	0.0135972
	3597.95	0.00346	0.00801	0.00307	0.00577	0.00576	0.00412	0.0162246	0.00734329	0.0068585	0.0100743	0.00810214	0.0135851
	3597.71	0.00345	0.00797	0.00305	0.00576	0.00575	0.0041	0.0162167	0.00711343	0.00692455	0.0101226	0.00823513	0.0134423
	3597.47	0.00343	0.00793	0.00303	0.00576	0.00574	0.00409	0.0161444	0.00695983	0.0069196	0.0100867	0.00836772	0.0131896
	3597.22	0.00341	0.0079	0.00301	0.00575	0.00574	0.00407	0.0160486	0.00690598	0.00683819	0.00998078	0.00848961	0.012869
	3596.98	0.00339	0.00786	0.00299	0.00574	0.00573	0.00406	0.015975	0.00695808	0.00669006	0.0098357	0.00858695	0.012531
	3596.74	0.00338	0.00782	0.00297	0.00574	0.00573	0.00404	0.0159582	0.00710643	0.00649556	0.00969153	0.00864612	0.0122242
	3596.5	0.00336	0.00778	0.00295	0.00573	0.00572	0.00402	0.0160129	0.00732699	0.00628423	0.00958834	0.00865387	0.0119888
	3596.26	0.00334	0.00775	0.00294	0.00572	0.00572	0.00401	0.01613	0.00758796	0.00608891	0.00956045	0.00860177	0.0118509
	3596.02	0.00333	0.00771	0.00292	0.00571	0.00571	0.00399	0.0162777	0.00784757	0.00594222	0.00962945	0.00849227	0.0118197
	3595.78	0.00331	0.00767	0.0029	0.00571	0.00571	0.00398	0.0164077	0.00805798	0.00586551	0.00979241	0.00833713	0.0118833
	3595.54	0.0033	0.00763	0.00288	0.0057	0.0057	0.00396	0.0164759	0.00817031	0.00586056	0.0100204	0.00815947	0.0120088
	3595.3	0.00328	0.00759	0.00287	0.00569	0.0057	0.00394	0.0164606	0.00814783	0.00590757	0.0102592	0.0079863	0.0121523
	3595.05	0.00327	0.00755	0.00285	0.00569	0.0057	0.00393	0.0163761	0.0079844	0.00597439	0.0104515	0.00784143	0.0122713
	3594.81	0.00325	0.0075	0.00283	0.00568	0.00569	0.00391	0.0162588	0.00770967	0.0060316	0.0105576	0.00773819	0.0123405
	3594.57	0.00324	0.00746	0.00282	0.00567	0.00569	0.00389	0.0161466	0.00738301	0.00606886	0.0105642	0.00768004	0.0123569
	3594.33	0.00322	0.00742	0.0028	0.00566	0.00569	0.00388	0.0160633	0.0070765	0.00609148	0.0104767	0.00766437	0.0123307
	3594.09	0.00321	0.00738	0.00278	0.00566	0.00569	0.00386	0.0160165	0.00685746	0.00611546	0.010311	0.00768713	0.0122797
	3593.85	0.0032	0.00734	0.00277	0.00565	0.00568	0.00384	0.0160027	0.00677583	0.0061519	0.0100846	0.00774278	0.0122197
	3593.61	0.00319	0.00729	0.00275	0.00564	0.00568	0.00383	0.0160165	0.00684963	0.00619806	0.00982211	0.00782562	0.0121586
	3593.37	0.00317	0.00725	0.00274	0.00564	0.00568	0.00381	0.0160558	0.00705197	0.00622932	0.00955463	0.00792459	0.012098
	3593.13	0.00316	0.00721	0.00272	0.00563	0.00568	0.00379	0.0161223	0.00730846	0.00620775	0.00931786	0.0080268	0.0120334
	3592.88	0.00315	0.00717	0.00271	0.00563	0.00568	0.00378	0.0162195	0.00751899	0.00609594	0.00914323	0.00811864	0.0119566
	3592.64	0.00314	0.00713	0.0027	0.00562	0.00568	0.00376	0.0163458	0.00759689	0.0058802	0.00904522	0.00819561	0.0118596
	3592.4	0.00313	0.00708	0.00268	0.00561	0.00568	0.00375	0.016493	0.00750512	0.00557789	0.0090177	0.00826017	0.0117401
	3592.16	0.00312	0.00704	0.00267	0.00561	0.00568	0.00373	0.0166482	0.00726214	0.00523189	0.00904368	0.00832289	0.0116018
	3591.92	0.00311	0.007	0.00265	0.0056	0.00567	0.00371	0.016798	0.00692335	0.00489231	0.00910671	0.00839384	0.0114528
	3591.68	0.0031	0.00696	0.00264	0.00559	0.00567	0.0037	0.016933	0.00655567	0.00460337	0.00919775	0.00847578	0.0113056
	3591.44	0.00309	0.00692	0.00263	0.00559	0.00567	0.00368	0.0170495	0.00621671	0.00439291	0.0093169	0.00856261	0.0111733
	3591.2	0.00308	0.00688	0.00262	0.00558	0.00567	0.00367	0.0171493	0.00594567	0.00427064	0.00946664	0.00863758	0.01107
	3590.96	0.00307	0.00683	0.0026	0.00558	0.00567	0.00365	0.0172412	0.00575942	0.00422863	0.00964697	0.00868107	0.0110079
	3590.72	0.00306	0.00679	0.00259	0.00557	0.00567	0.00364	0.0173333	0.00566051	0.00424839	0.0098479	0.00867664	0.0109904
	3590.47	0.00306	0.00675	0.00258	0.00557	0.00567	0.00362	0.0174331	0.00564585	0.00431098	0.0100491	0.0086198	0.0110161
	3590.23	0.00305	0.00671	0.00257	0.00556	0.00568	0.00361	0.0175404	0.00571979	0.004409	0.0102226	0.00852084	0.0110766
	3589.99	0.00304	0.00668	0.00256	0.00556	0.00568	0.00359	0.0176488	0.00590103	0.00455072	0.0103373	0.00840498	0.0111643
	3589.75	0.00303	0.00664	0.00255	0.00555	0.00568	0.00358	0.0177427	0.00622026	0.00475851	0.0103639	0.00830607	0.0112725
	3589.51	0.00303	0.0066	0.00254	0.00555	0.00568	0.00356	0.0178031	0.00670693	0.00505901	0.0102796	0.00826225	0.0114003
	3589.27	0.00302	0.00656	0.00253	0.00554	0.00568	0.00355	0.0178095	0.00736771	0.00547077	0.0100755	0.00830613	0.011552
	3589.03	0.00302	0.00653	0.00251	0.00554	0.00568	0.00353	0.0177524	0.00815891	0.00598563	0.00976998	0.00845405	0.0117356
	3588.79	0.00301	0.00649	0.0025	0.00553	0.00568	0.00352	0.0176387	0.00897718	0.00655811	0.00941542	0.00868859	0.0119558
	3588.55	0.003	0.00646	0.00249	0.00553	0.00568	0.00351	0.0174994	0.00969023	0.00711835	0.00908996	0.00895633	0.012215
	3588.3	0.003	0.00642	0.00249	0.00552	0.00568	0.00349	0.0173767	0.0101988	0.00760315	0.0088655	0.009183	0.0125084
	3588.06	0.00299	0.00639	0.00248	0.00552	0.00568	0.00348	0.017306	0.0104877	0.00798204	0.00877758	0.00930906	0.0128293
	3587.82	0.00299	0.00636	0.00247	0.00551	0.00568	0.00346	0.0173035	0.0106169	0.00825974	0.00882438	0.00930617	0.0131694
	3587.58	0.00298	0.00632	0.00246	0.00551	0.00568	0.00345	0.0173699	0.0106774	0.00844898	0.00898243	0.00918228	0.0135166
	3587.34	0.00298	0.00629	0.00245	0.0055	0.00568	0.00344	0.017501	0.0107434	0.00854735	0.00922957	0.00897529	0.0138476
	3587.1	0.00297	0.00627	0.00244	0.0055	0.00568	0.00342	0.0176875	0.0108393	0.00852336	0.00954345	0.00874468	0.0141233
	3586.86	0.00297	0.00624	0.00243	0.0055	0.00568	0.00341	0.0179143	0.0109303	0.00833012	0.00989349	0.00856042	0.0142892
	3586.62	0.00297	0.00621	0.00242	0.00549	0.00568	0.0034	0.0181521	0.0109378	0.00793605	0.0102332	0.00847957	0.0142967
	3586.38	0.00296	0.00618	0.00241	0.00549	0.00569	0.00339	0.0183629	0.0107833	0.00736391	0.0105075	0.00851812	0.0141297
	3586.14	0.00296	0.00616	0.00241	0.00549	0.00569	0.00337	0.0185104	0.0104386	0.00669221	0.0106762	0.00864068	0.0138184
	3585.89	0.00295	0.00614	0.0024	0.00548	0.00569	0.00336	0.0185752	0.00993749	0.00602056	0.010729	0.00878107	0.0134228
	3585.65	0.00295	0.00611	0.00239	0.00548	0.00569	0.00335	0.0185545	0.00934882	0.0054287	0.0106819	0.00887709	0.0130056
	3585.41	0.00295	0.00609	0.00238	0.00548	0.00569	0.00334	0.0184598	0.0087448	0.00495828	0.0105667	0.00889311	0.012612
	3585.17	0.00294	0.00607	0.00237	0.00548	0.00569	0.00332	0.0183089	0.00818079	0.00461494	0.0104189	0.00882544	0.0122659
	3584.93	0.00294	0.00606	0.00237	0.00547	0.00569	0.00331	0.0181234	0.00768976	0.00438306	0.0102742	0.00869849	0.0119744
	3584.69	0.00294	0.00604	0.00236	0.00547	0.00569	0.0033	0.0179285	0.00728407	0.00423568	0.0101647	0.00855422	0.0117346
	3584.45	0.00293	0.00602	0.00235	0.00547	0.00569	0.00329	0.0177493	0.00695927	0.00414552	0.0101153	0.00844091	0.0115405
	3584.21	0.00293	0.00601	0.00235	0.00547	0.00569	0.00328	0.0176076	0.00669694	0.00409081	0.0101396	0.00839762	0.0113874
	3583.97	0.00293	0.006	0.00234	0.00547	0.00569	0.00327	0.0175146	0.00646949	0.00405934	0.0102309	0.00843882	0.0112738
	3583.72	0.00292	0.00599	0.00233	0.00546	0.00569	0.00325	0.0174696	0.00624953	0.00404846	0.0103659	0.00854456	0.0112036
	3583.48	0.00292	0.00598	0.00232	0.00546	0.00568	0.00324	0.0174589	0.00601793	0.00406427	0.0105065	0.00866703	0.0111852
	3583.24	0.00292	0.00597	0.00232	0.00546	0.00568	0.00323	0.0174638	0.00577223	0.0041134	0.0106131	0.00874846	0.0112264
	3583	0.00291	0.00596	0.00231	0.00546	0.00568	0.00322	0.0174678	0.00552772	0.00419888	0.0106575	0.00874421	0.0113279
	3582.76	0.00291	0.00596	0.0023	0.00546	0.00568	0.00321	0.0174617	0.00531526	0.00431789	0.0106285	0.0086407	0.0114819
	3582.52	0.00291	0.00595	0.0023	0.00546	0.00568	0.0032	0.0174438	0.00516982	0.00446405	0.0105334	0.00846041	0.0116719
	3582.28	0.00291	0.00595	0.00229	0.00546	0.00568	0.00319	0.0174171	0.00512315	0.00462966	0.0103926	0.00825147	0.011877
	3582.04	0.0029	0.00595	0.00229	0.00546	0.00568	0.00318	0.0173817	0.00519575	0.00481011	0.0102305	0.00806861	0.0120789
	3581.8	0.0029	0.00595	0.00228	0.00547	0.00568	0.00317	0.017332	0.00539326	0.0050031	0.010068	0.00795667	0.0122685
	3581.55	0.0029	0.00596	0.00227	0.00547	0.00568	0.00316	0.0172613	0.00570767	0.00520893	0.00992068	0.00793986	0.0124482
	3581.31	0.00289	0.00596	0.00227	0.00547	0.00568	0.00315	0.0171634	0.00611883	0.00542168	0.00979786	0.00802046	0.0126277
	3581.07	0.00289	0.00597	0.00226	0.00547	0.00568	0.00314	0.0170409	0.00659573	0.00562909	0.00970473	0.00818261	0.0128181
	3580.83	0.00289	0.00597	0.00226	0.00547	0.00568	0.00313	0.016909	0.00709776	0.00580873	0.00964567	0.00840097	0.0130214
	3580.59	0.00289	0.00598	0.00225	0.00548	0.00568	0.00312	0.0167963	0.00757508	0.00593088	0.00962399	0.00864686	0.0132242
	3580.35	0.00288	0.00599	0.00225	0.00548	0.00567	0.00312	0.0167376	0.00797308	0.00596713	0.00964308	0.00888765	0.0133974
	3580.11	0.00288	0.00601	0.00224	0.00548	0.00567	0.00311	0.0167624	0.0082412	0.00590032	0.00970526	0.00909353	0.013502
	3579.87	0.00288	0.00602	0.00224	0.00549	0.00567	0.0031	0.0168832	0.0083444	0.00573253	0.00980898	0.00923443	0.0135043
	3579.63	0.00288	0.00603	0.00223	0.00549	0.00567	0.00309	0.0170843	0.00827718	0.00549142	0.00994667	0.00928779	0.0133935
	3579.39	0.00287	0.00605	0.00223	0.0055	0.00567	0.00308	0.017331	0.00806846	0.00522041	0.0101064	0.00924446	0.01319
	3579.14	0.00287	0.00607	0.00222	0.0055	0.00567	0.00307	0.0175792	0.00777619	0.00496833	0.0102746	0.00911505	0.0129407
	3578.9	0.00287	0.00609	0.00222	0.00551	0.00567	0.00307	0.0177931	0.00747454	0.00477572	0.0104348	0.00893041	0.0127055
	3578.66	0.00287	0.00611	0.00221	0.00551	0.00567	0.00306	0.017954	0.00723367	0.00466654	0.0105724	0.0087367	0.012541
	3578.42	0.00286	0.00613	0.00221	0.00552	0.00567	0.00305	0.018063	0.00710598	0.00464448	0.0106746	0.00858283	0.0124844
	3578.18	0.00286	0.00615	0.00221	0.00552	0.00567	0.00305	0.0181327	0.00711122	0.0046967	0.0107296	0.0085103	0.0125454
	3577.94	0.00286	0.00618	0.0022	0.00553	0.00567	0.00304	0.0181826	0.0072373	0.00480042	0.0107291	0.00853741	0.0127095
	3577.7	0.00286	0.0062	0.0022	0.00554	0.00567	0.00303	0.0182291	0.00744224	0.00492897	0.0106708	0.00865606	0.0129441
	3577.46	0.00285	0.00623	0.0022	0.00555	0.00567	0.00303	0.0182826	0.00766629	0.00505914	0.0105622	0.00882968	0.0132111
	3577.22	0.00285	0.00626	0.00219	0.00555	0.00567	0.00302	0.0183445	0.0078496	0.00517416	0.010422	0.0090056	0.0134764
	3576.97	0.00285	0.00628	0.00219	0.00556	0.00567	0.00301	0.0184109	0.00794949	0.00526481	0.0102777	0.00913252	0.0137196
	3576.73	0.00285	0.00631	0.00219	0.00557	0.00567	0.00301	0.0184766	0.0079538	0.00532885	0.0101603	0.00917772	0.0139351
	3576.49	0.00284	0.00634	0.00218	0.00558	0.00567	0.003	0.018537	0.00788098	0.00536683	0.0100925	0.00913964	0.0141254
	3576.25	0.00284	0.00638	0.00218	0.00559	0.00567	0.003	0.018591	0.00776882	0.0053791	0.0100848	0.00904478	0.0142935
	3576.01	0.00284	0.00641	0.00218	0.0056	0.00567	0.00299	0.0186379	0.00766123	0.00536713	0.0101342	0.00893632	0.0144369
	3575.77	0.00284	0.00644	0.00218	0.00561	0.00567	0.00299	0.0186759	0.00759235	0.0053327	0.0102262	0.00885851	0.0145438
	3575.53	0.00284	0.00648	0.00217	0.00562	0.00567	0.00299	0.018702	0.00758023	0.00528089	0.0103433	0.00884693	0.014599
	3575.29	0.00284	0.00651	0.00217	0.00563	0.00567	0.00298	0.0187141	0.00762361	0.00522124	0.0104693	0.00891913	0.0145877
	3575.05	0.00284	0.00655	0.00217	0.00564	0.00567	0.00298	0.0187126	0.00770479	0.00516972	0.010593	0.00907511	0.014506
	3574.8	0.00283	0.00658	0.00217	0.00566	0.00567	0.00297	0.0187053	0.00779474	0.00514283	0.0107103	0.00929496	0.0143642
	3574.56	0.00283	0.00662	0.00217	0.00567	0.00568	0.00297	0.0187058	0.00785931	0.00515462	0.0108221	0.00954956	0.0141864
	3574.32	0.00283	0.00666	0.00216	0.00568	0.00568	0.00297	0.0187301	0.00786676	0.00520943	0.0109296	0.00980206	0.0140025
	3574.08	0.00283	0.00669	0.00216	0.00569	0.00568	0.00296	0.018788	0.00779643	0.00529926	0.0110299	0.0100216	0.01384
	3573.84	0.00283	0.00673	0.00216	0.00571	0.00568	0.00296	0.0188798	0.00764321	0.00540559	0.0111146	0.0101859	0.0137122
	3573.6	0.00283	0.00677	0.00216	0.00572	0.00569	0.00296	0.0189941	0.00742004	0.00550394	0.0111708	0.0102904	0.0136175
	3573.36	0.00283	0.00681	0.00216	0.00573	0.00569	0.00296	0.0191098	0.00715494	0.00556887	0.0111857	0.0103447	0.0135392
	3573.12	0.00283	0.00684	0.00216	0.00575	0.00569	0.00296	0.0192053	0.00688841	0.00558254	0.011152	0.0103707	0.0134552
	3572.88	0.00283	0.00688	0.00216	0.00576	0.00569	0.00295	0.0192621	0.00666346	0.00553736	0.0110707	0.0103944	0.0133465
	3572.64	0.00283	0.00692	0.00216	0.00578	0.0057	0.00295	0.0192714	0.00651895	0.00543844	0.0109524	0.0104381	0.0132059
	3572.39	0.00283	0.00696	0.00216	0.00579	0.0057	0.00295	0.0192328	0.00647934	0.00530264	0.0108147	0.0105118	0.0130408
	3572.15	0.00283	0.007	0.00216	0.00581	0.0057	0.00295	0.0191514	0.00654833	0.00515505	0.010675	0.0106088	0.0128728
	3571.91	0.00283	0.00703	0.00216	0.00582	0.00571	0.00295	0.019036	0.00670963	0.00502548	0.0105463	0.0107094	0.0127338
	3571.67	0.00283	0.00707	0.00216	0.00584	0.00571	0.00295	0.0188944	0.00692853	0.00494187	0.0104346	0.0107868	0.0126577
	3571.43	0.00283	0.00711	0.00216	0.00585	0.00572	0.00295	0.0187341	0.00716007	0.00492645	0.0103387	0.0108199	0.0126714
	3571.19	0.00283	0.00714	0.00216	0.00587	0.00572	0.00295	0.0185664	0.00735959	0.00498905	0.0102558	0.0108035	0.0127874
	3570.95	0.00284	0.00718	0.00216	0.00588	0.00572	0.00295	0.0184073	0.00749062	0.00512493	0.0101846	0.0107534	0.0129976
	3570.71	0.00284	0.00722	0.00216	0.0059	0.00573	0.00295	0.0182785	0.00753672	0.00531481	0.0101301	0.0107034	0.013275
	3570.47	0.00284	0.00725	0.00216	0.00591	0.00573	0.00295	0.0181983	0.00750578	0.00552909	0.0101004	0.0106929	0.0135792
	3570.22	0.00284	0.00729	0.00216	0.00593	0.00574	0.00295	0.0181752	0.00743273	0.0057388	0.0101039	0.0107523	0.0138706
	3569.98	0.00284	0.00732	0.00216	0.00594	0.00574	0.00295	0.0182012	0.00737144	0.00592635	0.0101436	0.0108889	0.0141265
	3569.74	0.00284	0.00735	0.00216	0.00596	0.00575	0.00295	0.0182521	0.00738491	0.00609255	0.0102152	0.0110879	0.0143474
	3569.5	0.00285	0.00738	0.00216	0.00598	0.00575	0.00295	0.0182938	0.0075345	0.00625606	0.0103065	0.0113165	0.0145553
	3569.26	0.00285	0.00741	0.00216	0.00599	0.00576	0.00295	0.018291	0.00787363	0.00644675	0.010401	0.0115337	0.014788
	3569.02	0.00285	0.00744	0.00216	0.00601	0.00576	0.00295	0.0182172	0.00843474	0.00669868	0.0104791	0.0116975	0.0150862
	3568.78	0.00285	0.00747	0.00216	0.00602	0.00577	0.00295	0.0180659	0.00921465	0.00703351	0.010521	0.0117746	0.0154788
	3568.54	0.00286	0.0075	0.00216	0.00604	0.00578	0.00295	0.0178626	0.0101535	0.00744557	0.0105093	0.0117468	0.0159642
	3568.3	0.00286	0.00753	0.00217	0.00605	0.00578	0.00295	0.017671	0.0111305	0.00789216	0.010435	0.0116243	0.0164986
	3568.05	0.00286	0.00755	0.00217	0.00607	0.00579	0.00296	0.01757	0.0119969	0.00830335	0.0103011	0.0114457	0.0170054
	3567.81	0.00287	0.00758	0.00217	0.00608	0.00579	0.00296	0.0176148	0.0126414	0.00861249	0.0101203	0.0112691	0.0174098
	3567.57	0.00287	0.0076	0.00217	0.0061	0.0058	0.00296	0.0178032	0.0130442	0.00879184	0.00991018	0.0111458	0.0176748
	3567.33	0.00287	0.00762	0.00217	0.00611	0.0058	0.00296	0.0180849	0.0132701	0.00886142	0.00968595	0.0111046	0.0178125
	3567.09	0.00288	0.00764	0.00217	0.00613	0.00581	0.00296	0.0184001	0.0134115	0.00886899	0.00946886	0.0111444	0.0178663
	3566.85	0.00288	0.00766	0.00217	0.00614	0.00581	0.00296	0.0187086	0.0135283	0.00885935	0.00929526	0.0112429	0.0178759
	3566.61	0.00288	0.00768	0.00217	0.00616	0.00582	0.00296	0.0190013	0.0136114	0.00885242	0.0092265	0.0113597	0.0178558
	3566.37	0.00289	0.0077	0.00217	0.00617	0.00583	0.00297	0.0192941	0.0135831	0.00883052	0.00933121	0.0114433	0.0177873
	3566.13	0.00289	0.00771	0.00217	0.00618	0.00583	0.00297	0.0196076	0.0133411	0.00875206	0.00964546	0.0114459	0.0176364
	3565.89	0.00289	0.00772	0.00217	0.0062	0.00584	0.00297	0.0199436	0.0128265	0.00857496	0.0101344	0.0113403	0.0173765
	3565.64	0.0029	0.00774	0.00217	0.00621	0.00584	0.00297	0.0202787	0.012071	0.00828595	0.0106993	0.0111344	0.0170158
	3565.4	0.0029	0.00775	0.00217	0.00622	0.00585	0.00297	0.0205754	0.0111844	0.00791033	0.0112233	0.010865	0.0165964
	3565.16	0.00291	0.00775	0.00217	0.00623	0.00585	0.00297	0.0208018	0.0103048	0.00749739	0.0116214	0.0105816	0.0161774
	3564.92	0.00291	0.00776	0.00217	0.00624	0.00586	0.00297	0.0209412	0.00955103	0.00710389	0.0118517	0.0103299	0.0158165
	3564.68	0.00291	0.00777	0.00216	0.00626	0.00586	0.00298	0.0209905	0.00900002	0.00677864	0.011905	0.0101433	0.0155566
	3564.44	0.00292	0.00777	0.00216	0.00627	0.00587	0.00298	0.0209603	0.00868442	0.00655728	0.0117991	0.0100372	0.0154234
	3564.2	0.00292	0.00777	0.00216	0.00628	0.00587	0.00298	0.0208729	0.00859286	0.00645883	0.0115728	0.0100093	0.015425
	3563.96	0.00293	0.00777	0.00216	0.00629	0.00588	0.00298	0.02076	0.00867636	0.00648066	0.011285	0.0100391	0.0155492
	3563.72	0.00293	0.00777	0.00216	0.0063	0.00588	0.00298	0.0206571	0.00885603	0.00659937	0.0110056	0.0100926	0.0157675
	3563.47	0.00293	0.00777	0.00216	0.0063	0.00589	0.00298	0.0205942	0.00904308	0.00677123	0.0107989	0.0101339	0.0160387
	3563.23	0.00294	0.00777	0.00216	0.00631	0.00589	0.00298	0.0205893	0.00915854	0.00694594	0.0107049	0.0101394	0.0163238
	3562.99	0.00294	0.00776	0.00215	0.00632	0.00589	0.00298	0.0206438	0.00915145	0.00707615	0.010729	0.0101055	0.0165904
	3562.75	0.00294	0.00776	0.00215	0.00633	0.0059	0.00298	0.020749	0.00900367	0.00712887	0.0108468	0.0100498	0.0168179
	3562.51	0.00295	0.00775	0.00215	0.00634	0.0059	0.00298	0.0208914	0.00872493	0.00709048	0.0110188	0.00999872	0.0169972
	3562.27	0.00295	0.00774	0.00215	0.00634	0.0059	0.00298	0.0210577	0.00834657	0.006967	0.0112058	0.00997659	0.0171259
	3562.03	0.00295	0.00773	0.00214	0.00635	0.00591	0.00298	0.0212376	0.00791354	0.00678064	0.0113814	0.00999576	0.0172073
	3561.79	0.00296	0.00772	0.00214	0.00635	0.00591	0.00298	0.0214216	0.00747821	0.0065658	0.0115355	0.0100544	0.0172486
	3561.55	0.00296	0.0077	0.00214	0.00636	0.00591	0.00299	0.0215997	0.00709977	0.00636191	0.01167	0.0101406	0.0172613
	3561.3	0.00296	0.00769	0.00213	0.00636	0.00592	0.00299	0.0217623	0.00683403	0.00620597	0.0117927	0.0102416	0.0172592
	3561.06	0.00297	0.00767	0.00213	0.00637	0.00592	0.00298	0.021899	0.00672649	0.00612447	0.0119091	0.0103519	0.017255
	3560.82	0.00297	0.00765	0.00213	0.00637	0.00592	0.00298	0.0220035	0.00680108	0.00612518	0.0120186	0.0104736	0.0172547
	3560.58	0.00297	0.00763	0.00212	0.00637	0.00592	0.00298	0.022074	0.00704965	0.00619636	0.012112	0.0106134	0.0172528
	3560.34	0.00297	0.00761	0.00212	0.00638	0.00592	0.00298	0.0221173	0.00742739	0.00630456	0.0121749	0.0107744	0.0172329
	3560.1	0.00298	0.00759	0.00211	0.00638	0.00593	0.00298	0.0221468	0.00785961	0.00640601	0.0121948	0.010947	0.0171734
	3559.86	0.00298	0.00757	0.00211	0.00638	0.00593	0.00298	0.0221776	0.00826101	0.00645871	0.0121688	0.0111075	0.0170544
	3559.62	0.00298	0.00755	0.0021	0.00638	0.00593	0.00298	0.0222207	0.00856407	0.00643862	0.0121066	0.0112222	0.016872
	3559.38	0.00298	0.00752	0.0021	0.00638	0.00593	0.00298	0.0222785	0.00873761	0.00634802	0.0120271	0.0112641	0.0166402
	3559.14	0.00299	0.0075	0.00209	0.00638	0.00593	0.00298	0.0223468	0.0087901	0.00620998	0.0119535	0.0112215	0.0163888
	3558.89	0.00299	0.00747	0.00209	0.00638	0.00593	0.00298	0.0224172	0.0087563	0.00605992	0.0119039	0.0111031	0.0161536
	3558.65	0.00299	0.00744	0.00208	0.00638	0.00593	0.00298	0.0224849	0.00867764	0.0059314	0.0118907	0.010936	0.0159673
	3558.41	0.00299	0.00742	0.00208	0.00638	0.00593	0.00298	0.0225513	0.00858821	0.00585095	0.0119186	0.0107556	0.0158535
	3558.17	0.00299	0.00739	0.00207	0.00638	0.00593	0.00298	0.0226261	0.00850623	0.00583094	0.0119866	0.0105959	0.015821
	3557.93	0.003	0.00736	0.00207	0.00638	0.00593	0.00297	0.0227235	0.00843417	0.00587215	0.0120876	0.01048	0.0158637
	3557.69	0.003	0.00733	0.00206	0.00637	0.00593	0.00297	0.0228587	0.00836439	0.00596503	0.0122118	0.0104134	0.0159621
	3557.45	0.003	0.0073	0.00206	0.00637	0.00593	0.00297	0.0230374	0.00828676	0.00609307	0.0123442	0.0103854	0.0160888
	3557.21	0.003	0.00727	0.00205	0.00637	0.00593	0.00297	0.0232522	0.0081972	0.00623769	0.0124684	0.0103756	0.0162139
	3556.97	0.003	0.00724	0.00205	0.00636	0.00593	0.00297	0.0234801	0.00809748	0.00637827	0.0125668	0.0103641	0.0163101
	3556.72	0.003	0.00721	0.00204	0.00636	0.00593	0.00297	0.0236857	0.00799837	0.00649418	0.0126227	0.0103399	0.0163565
	3556.48	0.003	0.00718	0.00204	0.00636	0.00593	0.00296	0.0238323	0.00791492	0.00656703	0.0126247	0.0103072	0.0163446
	3556.24	0.003	0.00715	0.00203	0.00635	0.00593	0.00296	0.0238916	0.00786473	0.00658248	0.0125686	0.0102833	0.0162778
	3556	0.003	0.00712	0.00203	0.00635	0.00593	0.00296	0.0238546	0.00786583	0.00653573	0.0124618	0.0102915	0.0161731
	3555.76	0.003	0.00708	0.00202	0.00634	0.00593	0.00296	0.0237324	0.0079348	0.00643396	0.0123213	0.0103553	0.0160587
	3555.52	0.003	0.00705	0.00202	0.00634	0.00593	0.00296	0.0235547	0.00808269	0.00629706	0.0121705	0.010489	0.0159693
	3555.28	0.003	0.00702	0.00201	0.00633	0.00593	0.00295	0.0233597	0.00831235	0.00615387	0.0120356	0.0106956	0.0159378
	3555.04	0.00301	0.00699	0.002	0.00633	0.00593	0.00295	0.0231856	0.00861278	0.00603576	0.0119363	0.0109659	0.0159872
	3554.8	0.00301	0.00696	0.002	0.00632	0.00593	0.00295	0.0230588	0.00895591	0.00596945	0.0118804	0.0112804	0.0161224
	3554.55	0.00301	0.00693	0.002	0.00632	0.00593	0.00295	0.0229921	0.00929977	0.00597092	0.0118617	0.0116108	0.0163288
	3554.31	0.00301	0.0069	0.00199	0.00631	0.00593	0.00295	0.0229815	0.00959752	0.00604245	0.0118595	0.0119258	0.0165732
	3554.07	0.00301	0.00687	0.00199	0.0063	0.00593	0.00295	0.023008	0.00981098	0.0061734	0.0118446	0.0121958	0.0168149
	3553.83	0.00301	0.00684	0.00198	0.0063	0.00593	0.00294	0.0230478	0.00992624	0.00634696	0.0117895	0.0124	0.0170192
	3553.59	0.00301	0.00681	0.00198	0.00629	0.00593	0.00294	0.0230803	0.00995874	0.00654592	0.0116812	0.0125291	0.0171693
	3553.35	0.00301	0.00679	0.00197	0.00629	0.00593	0.00294	0.0230949	0.00994907	0.00675789	0.0115273	0.012585	0.017272
	3553.11	0.00301	0.00676	0.00197	0.00628	0.00593	0.00294	0.0230903	0.00994756	0.0069721	0.0113557	0.0125799	0.0173504
	3552.87	0.00301	0.00673	0.00197	0.00627	0.00593	0.00294	0.0230724	0.00999207	0.00717744	0.0112109	0.0125288	0.0174353
	3552.63	0.00301	0.00671	0.00196	0.00627	0.00593	0.00293	0.0230448	0.010093	0.00735578	0.0111365	0.012448	0.0175501
	3552.39	0.00301	0.00668	0.00196	0.00626	0.00593	0.00293	0.0230058	0.0102217	0.00748111	0.0111619	0.0123491	0.0177001
	3552.14	0.00301	0.00666	0.00196	0.00626	0.00593	0.00293	0.0229458	0.0103204	0.0075258	0.0112845	0.0122384	0.0178663
	3551.9	0.00301	0.00664	0.00195	0.00625	0.00593	0.00293	0.0228538	0.0103239	0.00747192	0.0114658	0.0121184	0.0180153
	3551.66	0.00301	0.00661	0.00195	0.00624	0.00593	0.00293	0.022726	0.0101898	0.00732242	0.0116479	0.0119887	0.0181125
	3551.42	0.00301	0.00659	0.00195	0.00624	0.00593	0.00293	0.0225722	0.00991586	0.00710362	0.0117777	0.0118506	0.0181381
	3551.18	0.00301	0.00657	0.00195	0.00623	0.00594	0.00293	0.0224123	0.00953736	0.00685589	0.0118253	0.0117103	0.0180918
	3550.94	0.00301	0.00655	0.00195	0.00623	0.00594	0.00293	0.0222709	0.00911164	0.006623	0.0117889	0.0115794	0.0179915
	3550.7	0.00301	0.00654	0.00195	0.00622	0.00594	0.00292	0.0221681	0.00869838	0.00644031	0.0116885	0.0114728	0.0178646
	3550.46	0.00301	0.00652	0.00195	0.00622	0.00594	0.00292	0.0221141	0.00834537	0.00632722	0.011554	0.0114051	0.0177411
	3550.22	0.00301	0.0065	0.00195	0.00621	0.00595	0.00292	0.0221065	0.00808129	0.00628576	0.0114155	0.0113895	0.0176487
	3549.97	0.00301	0.00649	0.00195	0.00621	0.00595	0.00292	0.0221331	0.00791716	0.00630133	0.011295	0.0114295	0.0176082
	3549.73	0.00301	0.00647	0.00195	0.00621	0.00595	0.00292	0.0221774	0.00784762	0.00634997	0.0112039	0.0115185	0.0176334
	3549.49	0.00302	0.00646	0.00195	0.0062	0.00596	0.00292	0.022229	0.00786259	0.00640702	0.0111447	0.0116372	0.0177288
	3549.25	0.00302	0.00645	0.00195	0.0062	0.00596	0.00292	0.0222888	0.00794937	0.00645451	0.011113	0.0117575	0.0178873
	3549.01	0.00302	0.00644	0.00195	0.0062	0.00596	0.00292	0.0223737	0.00810134	0.00648843	0.0111035	0.0118463	0.0180911
	3548.77	0.00302	0.00643	0.00195	0.00619	0.00597	0.00292	0.0225089	0.00831672	0.00651837	0.0111117	0.0118747	0.0183129
	3548.53	0.00302	0.00643	0.00195	0.00619	0.00597	0.00292	0.0227175	0.00859537	0.0065641	0.0111348	0.0118246	0.0185205
	3548.29	0.00302	0.00642	0.00195	0.00619	0.00598	0.00292	0.0230093	0.00893183	0.00664728	0.0111691	0.0116933	0.0186813
	3548.05	0.00302	0.00642	0.00196	0.00619	0.00599	0.00292	0.0233693	0.00931139	0.0067825	0.0112085	0.0114969	0.0187672
	3547.81	0.00303	0.00641	0.00196	0.00619	0.00599	0.00292	0.0237552	0.00970449	0.00697292	0.0112439	0.0112687	0.0187668
	3547.56	0.00303	0.00641	0.00196	0.00618	0.006	0.00292	0.0241073	0.0100715	0.00720418	0.011269	0.0110557	0.0186854
	3547.32	0.00303	0.00641	0.00197	0.00618	0.006	0.00292	0.0243623	0.0103697	0.00744785	0.011284	0.010907	0.0185469
	3547.08	0.00303	0.00641	0.00197	0.00618	0.00601	0.00292	0.0244811	0.0105679	0.00767029	0.0113013	0.0108598	0.0183888
	3546.84	0.00303	0.00641	0.00198	0.00618	0.00602	0.00292	0.0244623	0.0106571	0.00784605	0.0113424	0.010929	0.0182488
	3546.6	0.00304	0.00641	0.00198	0.00618	0.00603	0.00292	0.0243443	0.010652	0.00796394	0.0114303	0.0111012	0.0181533
	3546.36	0.00304	0.00642	0.00198	0.00618	0.00603	0.00292	0.0241831	0.010584	0.00803318	0.0115766	0.0113425	0.0181113
	3546.12	0.00304	0.00642	0.00199	0.00618	0.00604	0.00292	0.0240345	0.0104882	0.00807509	0.0117768	0.0116093	0.0181179
	3545.88	0.00304	0.00643	0.00199	0.00619	0.00605	0.00292	0.0239361	0.0103894	0.00811336	0.0120074	0.0118602	0.0181614
	3545.64	0.00305	0.00643	0.002	0.00619	0.00606	0.00292	0.0239033	0.0102973	0.00816253	0.0122343	0.0120655	0.018232
	3545.39	0.00305	0.00644	0.00201	0.00619	0.00607	0.00292	0.0239344	0.0102065	0.00822246	0.0124234	0.0122068	0.0183242
	3545.15	0.00305	0.00645	0.00201	0.00619	0.00608	0.00292	0.0240171	0.0101053	0.0082764	0.0125532	0.0122793	0.0184381
	3544.91	0.00306	0.00646	0.00202	0.0062	0.00609	0.00292	0.0241334	0.00998618	0.0082977	0.0126239	0.0122871	0.0185737
	3544.67	0.00306	0.00647	0.00203	0.0062	0.0061	0.00292	0.0242636	0.0098531	0.00826235	0.0126586	0.012244	0.0187284
	3544.43	0.00306	0.00648	0.00203	0.0062	0.00611	0.00292	0.0243889	0.00972578	0.00815999	0.0126913	0.0121653	0.0188928
	3544.19	0.00307	0.0065	0.00204	0.00621	0.00612	0.00292	0.0244906	0.00962952	0.00799949	0.0127511	0.0120671	0.0190531
	3543.95	0.00307	0.00651	0.00205	0.00621	0.00613	0.00292	0.0245527	0.00958628	0.00780778	0.0128476	0.0119649	0.0191942
	3543.71	0.00307	0.00652	0.00205	0.00622	0.00614	0.00292	0.0245655	0.00960121	0.00761714	0.0129695	0.0118733	0.0193032
	3543.47	0.00308	0.00654	0.00206	0.00622	0.00615	0.00292	0.0245289	0.00965942	0.00745735	0.01309	0.0118062	0.0193706
	3543.22	0.00308	0.00656	0.00207	0.00623	0.00616	0.00292	0.024457	0.00972837	0.00734557	0.013181	0.0117764	0.0193904
	3542.98	0.00308	0.00657	0.00208	0.00623	0.00617	0.00292	0.0243767	0.00976848	0.00728165	0.0132225	0.0117944	0.019356
	3542.74	0.00309	0.00659	0.00208	0.00624	0.00618	0.00292	0.0243226	0.00974645	0.00725369	0.0132145	0.0118653	0.0192652
	3542.5	0.00309	0.00661	0.00209	0.00624	0.00619	0.00291	0.0243233	0.00964681	0.00724271	0.0131741	0.0119863	0.0191176
	3542.26	0.0031	0.00663	0.0021	0.00625	0.00621	0.00291	0.0243907	0.00947687	0.00723322	0.0131291	0.0121448	0.01892
	3542.02	0.0031	0.00664	0.00211	0.00626	0.00622	0.00291	0.0245119	0.00926135	0.00722044	0.0131037	0.0123239	0.0186898
	3541.78	0.0031	0.00666	0.00212	0.00626	0.00623	0.00291	0.0246559	0.0090309	0.00721088	0.0131108	0.0125029	0.0184561
	3541.54	0.00311	0.00668	0.00212	0.00627	0.00624	0.00291	0.0247829	0.00881264	0.00721858	0.0131483	0.0126631	0.0182583
	3541.3	0.00311	0.0067	0.00213	0.00628	0.00625	0.00291	0.0248609	0.0086215	0.00725683	0.0132029	0.0127909	0.018139
	3541.06	0.00312	0.00672	0.00214	0.00629	0.00627	0.00291	0.0248781	0.00846455	0.00733066	0.0132584	0.0128798	0.0181349
	3540.81	0.00312	0.00674	0.00215	0.0063	0.00628	0.0029	0.0248491	0.00834367	0.00743194	0.013304	0.0129318	0.018266
	3540.57	0.00312	0.00676	0.00216	0.0063	0.00629	0.0029	0.0248127	0.00826367	0.00753914	0.0133386	0.012957	0.018523
	3540.33	0.00313	0.00679	0.00217	0.00631	0.0063	0.0029	0.0248169	0.00823585	0.00762403	0.0133719	0.0129698	0.0188689
	3540.09	0.00313	0.00681	0.00217	0.00632	0.00632	0.0029	0.0249002	0.00827359	0.00766185	0.0134155	0.0129834	0.019246
	3539.85	0.00314	0.00683	0.00218	0.00633	0.00633	0.00289	0.0250773	0.00838572	0.00763783	0.0134779	0.0130056	0.0195894
	3539.61	0.00314	0.00685	0.00219	0.00634	0.00634	0.00289	0.0253301	0.0085679	0.00755373	0.0135548	0.0130326	0.019846
	3539.37	0.00314	0.00687	0.0022	0.00635	0.00635	0.00289	0.0256154	0.00879755	0.00742502	0.0136322	0.0130507	0.0199836
	3539.13	0.00315	0.00689	0.0022	0.00636	0.00636	0.00288	0.0258792	0.00903839	0.00727782	0.0136894	0.0130367	0.0200002
	3538.89	0.00315	0.00691	0.00221	0.00637	0.00638	0.00288	0.0260736	0.0092504	0.0071418	0.0137083	0.0129671	0.0199196
	3538.64	0.00316	0.00693	0.00222	0.00638	0.00639	0.00288	0.0261717	0.00940494	0.00704171	0.0136813	0.0128268	0.0197826
	3538.4	0.00316	0.00695	0.00223	0.00639	0.0064	0.00287	0.0261748	0.00949547	0.00699261	0.0136132	0.0126173	0.0196361
	3538.16	0.00316	0.00697	0.00223	0.0064	0.00641	0.00287	0.0261065	0.00954047	0.00699777	0.0135193	0.0123617	0.0195183
	3537.92	0.00317	0.00699	0.00224	0.00641	0.00642	0.00287	0.0260023	0.00957308	0.00704907	0.0134184	0.0121032	0.019453
	3537.68	0.00317	0.00701	0.00225	0.00642	0.00644	0.00286	0.0258966	0.00962684	0.00713033	0.0133248	0.0118971	0.0194453
	3537.44	0.00317	0.00703	0.00225	0.00643	0.00645	0.00286	0.0258145	0.00972068	0.00722253	0.0132459	0.0117993	0.0194861
	3537.2	0.00318	0.00705	0.00226	0.00644	0.00646	0.00285	0.0257692	0.00985281	0.00730681	0.0131805	0.011854	0.0195556
	3536.96	0.00318	0.00707	0.00227	0.00645	0.00647	0.00285	0.0257645	0.0100019	0.00736995	0.0131243	0.0120804	0.0196318
	3536.72	0.00319	0.00709	0.00227	0.00646	0.00648	0.00284	0.0257984	0.0101397	0.00740594	0.0130754	0.0124602	0.0196923
	3536.47	0.00319	0.0071	0.00228	0.00647	0.00649	0.00284	0.0258663	0.0102476	0.00741965	0.0130377	0.0129366	0.0197227
	3536.23	0.00319	0.00712	0.00228	0.00648	0.0065	0.00283	0.0259617	0.0103263	0.00742284	0.0130238	0.0134276	0.0197167
	3535.99	0.00319	0.00714	0.00229	0.0065	0.00651	0.00283	0.0260766	0.0103988	0.00743106	0.0130473	0.0138499	0.0196788
	3535.75	0.0032	0.00715	0.00229	0.00651	0.00653	0.00282	0.0262002	0.0104956	0.00745623	0.0131197	0.0141416	0.019619
	3535.51	0.0032	0.00717	0.0023	0.00652	0.00654	0.00281	0.026318	0.0106401	0.00750239	0.0132417	0.0142785	0.0195517
	3535.27	0.0032	0.00718	0.0023	0.00653	0.00655	0.00281	0.0264144	0.0108343	0.0075635	0.0134035	0.0142736	0.0194916
	3535.03	0.00321	0.0072	0.00231	0.00654	0.00656	0.0028	0.0264762	0.0110574	0.00762648	0.0135856	0.0141699	0.0194519
	3534.79	0.00321	0.00721	0.00231	0.00655	0.00657	0.0028	0.026495	0.0112734	0.00767545	0.0137624	0.0140226	0.0194405
	3534.55	0.00321	0.00723	0.00232	0.00656	0.00658	0.00279	0.0264703	0.0114434	0.00769625	0.0139067	0.0138855	0.0194594
	3534.31	0.00321	0.00724	0.00232	0.00657	0.00659	0.00279	0.0264109	0.0115412	0.00768232	0.0139968	0.013797	0.0195039
	3534.06	0.00322	0.00725	0.00233	0.00659	0.0066	0.00278	0.0263317	0.0115592	0.00763576	0.0140188	0.0137739	0.0195631
	3533.82	0.00322	0.00726	0.00233	0.0066	0.00661	0.00277	0.0262518	0.0115101	0.0075646	0.0139706	0.0138114	0.0196208
	3533.58	0.00322	0.00727	0.00233	0.00661	0.00662	0.00277	0.0261889	0.0114191	0.0074814	0.0138636	0.0138878	0.0196602
	3533.34	0.00322	0.00729	0.00234	0.00662	0.00663	0.00276	0.0261568	0.0113164	0.00739815	0.0137211	0.0139761	0.019668
	3533.1	0.00323	0.0073	0.00234	0.00663	0.00664	0.00276	0.0261626	0.0112267	0.00732175	0.0135743	0.0140526	0.0196401
	3532.86	0.00323	0.0073	0.00234	0.00664	0.00664	0.00275	0.0262079	0.0111653	0.00725622	0.0134558	0.0141036	0.0195847
	3532.62	0.00323	0.00731	0.00234	0.00666	0.00665	0.00274	0.0262897	0.0111386	0.00719928	0.0133935	0.0141276	0.019518
	3532.38	0.00323	0.00732	0.00235	0.00667	0.00666	0.00274	0.0264033	0.0111452	0.00715025	0.0134045	0.014131	0.0194653
	3532.14	0.00323	0.00733	0.00235	0.00668	0.00667	0.00273	0.0265447	0.0111792	0.0071084	0.013492	0.0141222	0.0194494
	3531.89	0.00324	0.00734	0.00235	0.00669	0.00668	0.00273	0.0267098	0.0112303	0.00707605	0.0136466	0.0141067	0.0194851
	3531.65	0.00324	0.00734	0.00235	0.0067	0.00669	0.00272	0.0268934	0.011285	0.00705945	0.0138482	0.0140841	0.0195757
	3531.41	0.00324	0.00735	0.00236	0.00671	0.0067	0.00272	0.027088	0.0113274	0.00706607	0.0140714	0.0140506	0.0197101
	3531.17	0.00324	0.00736	0.00236	0.00673	0.00671	0.00271	0.0272843	0.0113438	0.00710275	0.0142916	0.0140036	0.0198676
	3530.93	0.00325	0.00736	0.00236	0.00674	0.00672	0.00271	0.0274689	0.011328	0.00717349	0.0144925	0.0139475	0.0200242
	3530.69	0.00325	0.00737	0.00236	0.00675	0.00673	0.0027	0.0276293	0.0112856	0.00727816	0.0146668	0.0138951	0.0201622
	3530.45	0.00325	0.00737	0.00236	0.00676	0.00673	0.0027	0.0277529	0.0112349	0.00741356	0.0148155	0.0138684	0.0202761
	3530.21	0.00325	0.00738	0.00236	0.00677	0.00674	0.0027	0.0278316	0.0112022	0.00757399	0.0149427	0.0138922	0.0203733
	3529.97	0.00325	0.00738	0.00237	0.00679	0.00675	0.00269	0.0278621	0.0112129	0.00775185	0.0150499	0.0139863	0.020468
	3529.72	0.00326	0.00738	0.00237	0.0068	0.00676	0.00269	0.027844	0.0112831	0.00793936	0.0151296	0.01416	0.0205747
	3529.48	0.00326	0.00739	0.00237	0.00681	0.00677	0.00269	0.0277832	0.011414	0.00812835	0.0151671	0.0144064	0.0207003
	3529.24	0.00326	0.00739	0.00237	0.00682	0.00678	0.00268	0.0276892	0.0115904	0.00831166	0.0151441	0.0147018	0.0208428
	3529	0.00326	0.00739	0.00237	0.00684	0.00679	0.00268	0.0275741	0.0117867	0.00848266	0.0150457	0.0150088	0.0209889
	3528.76	0.00327	0.00739	0.00237	0.00685	0.0068	0.00268	0.0274528	0.011975	0.00863558	0.0148698	0.0152853	0.0211209
	3528.52	0.00327	0.0074	0.00237	0.00686	0.00681	0.00268	0.0273357	0.0121335	0.00876572	0.0146269	0.015496	0.0212244
	3528.28	0.00327	0.0074	0.00237	0.00687	0.00681	0.00268	0.0272327	0.0122505	0.0088657	0.0143422	0.0156196	0.0212921
	3528.04	0.00327	0.0074	0.00238	0.00689	0.00682	0.00268	0.0271498	0.0123186	0.00892515	0.0140471	0.0156516	0.0213235
	3527.8	0.00328	0.0074	0.00238	0.0069	0.00683	0.00268	0.0270943	0.0123323	0.00892971	0.0137733	0.0156031	0.0213233
	3527.56	0.00328	0.00741	0.00238	0.00691	0.00684	0.00268	0.0270768	0.0122823	0.00886425	0.0135491	0.0154953	0.0212959
	3527.31	0.00328	0.00741	0.00238	0.00692	0.00685	0.00268	0.0271127	0.0121617	0.00872105	0.0133985	0.0153568	0.0212475
	3527.07	0.00328	0.00741	0.00238	0.00694	0.00686	0.00268	0.0272142	0.0119711	0.00850302	0.0133359	0.0152149	0.0211839
	3526.83	0.00329	0.00741	0.00238	0.00695	0.00687	0.00268	0.0273875	0.0117283	0.00823234	0.0133673	0.0150908	0.0211159
	3526.59	0.00329	0.00741	0.00239	0.00696	0.00688	0.00268	0.027624	0.0114697	0.00794685	0.0134871	0.0149956	0.0210623
	3526.35	0.00329	0.00742	0.00239	0.00698	0.00689	0.00269	0.0278985	0.0112422	0.00769226	0.0136802	0.0149274	0.0210462
	3526.11	0.0033	0.00742	0.00239	0.00699	0.0069	0.00269	0.0281739	0.0110871	0.00751239	0.0139264	0.0148739	0.0210908
	3525.87	0.0033	0.00742	0.00239	0.007	0.00691	0.00269	0.0284072	0.0110263	0.00743902	0.0141994	0.0148168	0.0212092
	3525.63	0.0033	0.00742	0.00239	0.00701	0.00693	0.0027	0.0285594	0.0110557	0.00748646	0.0144728	0.0147404	0.0213993
	3525.39	0.00331	0.00743	0.0024	0.00703	0.00694	0.0027	0.0286043	0.0111447	0.00764896	0.01472	0.0146391	0.0216402
	3525.14	0.00331	0.00743	0.0024	0.00704	0.00695	0.00271	0.0285364	0.0112503	0.00790154	0.0149181	0.0145191	0.0218928
	3524.9	0.00332	0.00743	0.0024	0.00705	0.00696	0.00271	0.028374	0.0113319	0.00820373	0.0150522	0.0143998	0.0221108
	3524.66	0.00332	0.00744	0.0024	0.00707	0.00697	0.00272	0.0281578	0.0113699	0.00850892	0.0151188	0.0143067	0.0222556
	3524.42	0.00333	0.00744	0.00241	0.00708	0.00698	0.00272	0.0279399	0.0113719	0.00877087	0.0151258	0.0142625	0.0223046
	3524.18	0.00333	0.00744	0.00241	0.00709	0.007	0.00273	0.0277714	0.0113687	0.00895019	0.0150907	0.0142788	0.022258
	3523.94	0.00334	0.00745	0.00241	0.00711	0.00701	0.00274	0.0276929	0.0113996	0.00902242	0.0150365	0.0143497	0.0221378
	3523.7	0.00334	0.00745	0.00242	0.00712	0.00702	0.00275	0.0277239	0.0114934	0.00898219	0.014985	0.0144529	0.0219808
	3523.46	0.00335	0.00746	0.00242	0.00714	0.00703	0.00276	0.0278626	0.0116534	0.00884494	0.0149543	0.0145567	0.0218287
	3523.22	0.00335	0.00746	0.00242	0.00715	0.00705	0.00277	0.0280819	0.0118515	0.00864806	0.0149537	0.0146304	0.0217172
	3522.97	0.00336	0.00747	0.00243	0.00716	0.00706	0.00277	0.0283419	0.0120358	0.0084445	0.0149834	0.014656	0.0216734
	3522.73	0.00336	0.00748	0.00243	0.00718	0.00707	0.00278	0.0285976	0.0121523	0.00828868	0.0150358	0.0146375	0.0217099
	3522.49	0.00337	0.00748	0.00243	0.00719	0.00709	0.0028	0.028816	0.0121644	0.0082194	0.0150988	0.0145973	0.0218267
	3522.25	0.00337	0.00749	0.00244	0.0072	0.0071	0.00281	0.0289802	0.0120669	0.00824646	0.0151596	0.0145693	0.0220117
	3522.01	0.00338	0.0075	0.00244	0.00722	0.00712	0.00282	0.0290907	0.0118838	0.00834645	0.0152107	0.0145813	0.022244
	3521.77	0.00338	0.00751	0.00244	0.00723	0.00713	0.00283	0.0291576	0.0116571	0.00847251	0.0152481	0.01465	0.022494
	3521.53	0.00339	0.00751	0.00245	0.00724	0.00714	0.00284	0.0291953	0.0114329	0.00856882	0.0152732	0.0147753	0.0227263
	3521.29	0.0034	0.00752	0.00245	0.00726	0.00716	0.00285	0.0292158	0.0112472	0.00858884	0.0152898	0.0149418	0.0229021
	3521.05	0.0034	0.00753	0.00246	0.00727	0.00717	0.00287	0.0292287	0.0111237	0.00850959	0.0153042	0.015127	0.0229894
	3520.81	0.00341	0.00754	0.00246	0.00728	0.00719	0.00288	0.0292402	0.0110726	0.00834082	0.0153227	0.015306	0.0229732
	3520.56	0.00342	0.00755	0.00247	0.0073	0.0072	0.00289	0.0292559	0.0110911	0.00812212	0.0153514	0.015459	0.0228639
	3520.32	0.00342	0.00756	0.00247	0.00731	0.00722	0.00291	0.0292797	0.011169	0.00791119	0.0153933	0.01557	0.0226986
	3520.08	0.00343	0.00758	0.00248	0.00732	0.00724	0.00292	0.0293135	0.0112904	0.00776691	0.0154473	0.015629	0.0225339
	3519.84	0.00344	0.00759	0.00248	0.00734	0.00725	0.00294	0.0293568	0.0114349	0.00773235	0.0155084	0.0156275	0.0224311
	3519.6	0.00344	0.0076	0.00249	0.00735	0.00727	0.00295	0.0294054	0.0115784	0.00782156	0.0155672	0.0155606	0.0224342
	3519.36	0.00345	0.00761	0.00249	0.00736	0.00728	0.00297	0.0294485	0.0116927	0.0080172	0.0156107	0.0154259	0.0225543
	3519.12	0.00346	0.00762	0.0025	0.00737	0.0073	0.00298	0.0294736	0.0117528	0.00827885	0.0156272	0.0152336	0.0227633
	3518.88	0.00347	0.00764	0.0025	0.00739	0.00732	0.003	0.0294679	0.0117388	0.00855489	0.0156076	0.0150047	0.0230008
	3518.64	0.00347	0.00765	0.00251	0.0074	0.00733	0.00301	0.0294237	0.0116438	0.00880025	0.0155503	0.0147735	0.023194
[truncated: 11,900 more rows]
